# Supplementary material for: The Smart Aerial Release Machine, a Universal System for Applying the Sterile Insect Technique
Source: PLoS One. 2014 Jul 18;9(7):e103077. doi: 10.1371/journal.pone.0103077 (PMC4103892; doi:10.1371/journal.pone.0103077)
Supplement: Data S1 — Data of release-recapture trials in Mexico (Excel 2010 file). (XLSX) [file pone.0103077.s008.xlsx]

## Sheet: A.ludens_per_polygon
week	polygon	Area	Long	Wide	Density	Nb_released	FTD	capture	recapture	installed_traps	positive_traps	pcent_positive_traps	pcent_recapt
1	Rv 2	600	4000	1500	2000	1200000	2.83	0	475	24	23	0.958333	0.0395833
2	Rv 2	600	4000	1500	2000	1200000	0.49	0	82	24	22	0.916667	0.00683333
3	Rv 2	600	4000	1500	2000	1200000	0.86	0	144	24	24	1	0.012
4	Rv 2	600	4000	1500	2000	1200000	0.64	0	108	24	24	1	0.009
5	Rv 2	600	4000	1500	2000	1200000	0.5	0	84	24	20	0.833333	0.007
6	Rv 2	600	4000	1500	2000	1200000	1.76	0	296	24	24	1	0.0246667
7	Rv 2	600	4000	1500	2000	1200000	2.83	1	475	24	23	0.958333	0.0395833
8	Rv 2	600	4000	1500	2000	1200000	4.15	0	697	24	24	1	0.0580833
9	Rv 2	600	4000	1500	2000	1200000	6.57	1	1104	24	20	0.833333	0.092
10	Rv 2	600	4000	1500	2000	1200000	3.76	0	632	24	24	1	0.0526667
11	Rv 2	600	4000	1500	1500	900000	6.67	1	1121	24	22	0.916667	0.124556
12	Rv 2	600	4000	1500	1500	900000	3.5	0	588	24	24	1	0.0653333
13	Rv 2	600	4000	1500	1500	900000	5.33	1	895	24	24	1	0.0994444
14	Rv 2	600	4000	1500	1500	900000	1.69	0	284	24	22	0.916667	0.0315556
15	Rv 2	600	4000	1500	1500	900000	4.18	1	702	24	20	0.833333	0.078
16	Rv 2	600	4000	1500	1500	900000	3.25	1	546	24	22	0.916667	0.0606667
17	Rv 2	600	4000	1500	1500	900000	2.75	1	462	24	24	1	0.0513333
18	Rv 2	600	4000	1500	1500	900000	1.99	1	334	24	24	1	0.0371111
19	Rv 2	600	4000	1500	1500	900000	3.96	1	665	24	24	1	0.0738889
20	Rv 2	600	4000	1500	1500	900000	2.02	1	339	24	23	0.958333	0.0376667
21	Rv 2	600	4000	1500	1000	600000	2.7	0	454	24	23	0.958333	0.0756667
22	Rv 2	600	4000	1500	1000	600000	1.88	0	316	24	24	1	0.0526667
23	Rv 2	600	4000	1500	1000	600000	3.6	1	605	24	24	1	0.100833
24	Rv 2	600	4000	1500	1000	600000	4.59	0	771	24	23	0.958333	0.1285
25	Rv 2	600	4000	1500	1000	600000	3.99	0	670	24	22	0.916667	0.111667
26	Rv 2	600	4000	1500	1000	600000	4.54	0	763	24	24	1	0.127167
27	Rv 2	600	4000	1500	1000	600000	7.5	2	1260	24	24	1	0.21
28	Rv 2	600	4000	1500	1000	600000	5.39	0	906	24	22	0.916667	0.151
29	Rv 2	600	4000	1500	1000	600000	6.28	2	1055	24	24	1	0.175833
30	Rv 2	600	4000	1500	1000	600000	5.92	1	995	24	24	1	0.165833
31	Rv 2	600	4000	1500	500	300000	8.05	1	1352	24	23	0.958333	0.450667
32	Rv 2	600	4000	1500	500	300000	6.71	2	1127	24	23	0.958333	0.375667
33	Rv 2	600	4000	1500	500	300000	4.69	0	788	24	24	1	0.262667
34	Rv 2	600	4000	1500	500	300000	4.97	0	835	24	23	0.958333	0.278333
35	Rv 2	600	4000	1500	500	300000	3.52	0	591	24	22	0.916667	0.197
36	Rv 2	600	4000	1500	500	300000	2.44	0	410	24	24	1	0.136667
37	Rv 2	600	4000	1500	500	300000	1.97	0	331	24	24	1	0.110333
38	Rv 2	600	4000	1500	500	300000	2.52	0	423	24	24	1	0.141
39	Rv 2	600	4000	1500	500	300000	1.8	0	302	24	23	0.958333	0.100667
1	P1B5	735	7000	1050	2000	1470000	2.48	1	520	30	25	0.833333	0.0353742
2	P1B5	735	7000	1050	2000	1470000	0.48	1	101	30	26	0.866667	0.00687075
3	P1B5	735	7000	1050	2000	1470000	3.67	0	770	30	29	0.966667	0.052381
4	P1B5	735	7000	1050	2000	1470000	0.84	0	177	30	29	0.966667	0.0120408
5	P1B5	735	7000	1050	2000	1470000	0.55	1	115	30	25	0.833333	0.00782313
6	P1B5	735	7000	1050	2000	1470000	1.5	0	315	30	30	1	0.0214286
7	P1B5	735	7000	1050	2000	1470000	2.14	1	450	30	27	0.9	0.0306122
8	P1B5	735	7000	1050	2000	1470000	3.89	1	816	30	28	0.933333	0.0555102
9	P1B5	735	7000	1050	2000	1470000	4.7	2	987	30	24	0.8	0.0671429
10	P1B5	735	7000	1050	1500	1102500	5	1	1049	30	30	1	0.0951474
11	P1B5	735	7000	1050	1500	1102500	5.98	0	1255	30	24	0.8	0.113832
12	P1B5	735	7000	1050	1500	1102500	2.19	1	459	30	24	0.8	0.0416327
13	P1B5	735	7000	1050	1500	1102500	4.75	0	998	30	29	0.966667	0.0905215
14	P1B5	735	7000	1050	1500	1102500	1.46	1	307	30	30	1	0.0278458
15	P1B5	735	7000	1050	1500	1102500	3.83	2	804	30	25	0.833333	0.0729252
16	P1B5	735	7000	1050	1500	1102500	2.62	0	551	30	24	0.8	0.0499773
17	P1B5	735	7000	1050	1500	1102500	2.87	1	602	30	27	0.9	0.0546032
18	P1B5	735	7000	1050	1500	1102500	2.02	0	425	30	28	0.933333	0.0385488
19	P1B5	735	7000	1050	1500	1102500	3.45	0	725	30	29	0.966667	0.0657596
20	P1B5	735	7000	1050	1000	735000	2.1	0	441	30	24	0.8	0.06
21	P1B5	735	7000	1050	1000	735000	1.45	1	305	30	22	0.733333	0.0414966
22	P1B5	735	7000	1050	1000	735000	1.42	1	299	30	25	0.833333	0.0406803
23	P1B5	735	7000	1050	1000	735000	3.69	0	774	30	29	0.966667	0.105306
24	P1B5	735	7000	1050	1000	735000	4	0	840	30	27	0.9	0.114286
25	P1B5	735	7000	1050	1000	735000	3.17	1	666	30	27	0.9	0.0906122
26	P1B5	735	7000	1050	1000	735000	3.53	0	742	30	25	0.833333	0.100952
27	P1B5	735	7000	1050	1000	735000	4.7	2	987	30	24	0.8	0.134286
28	P1B5	735	7000	1050	1000	735000	5.02	1	1054	30	20	0.666667	0.143401
29	P1B5	735	7000	1050	1000	735000	3.35	0	704	30	22	0.733333	0.0957823
30	P1B5	735	7000	1050	500	367500	4.7	1	987	30	21	0.7	0.268571
31	P1B5	735	7000	1050	500	367500	4.06	0	852	30	17	0.566667	0.231837
32	P1B5	735	7000	1050	500	367500	3.45	0	725	30	20	0.666667	0.197279
33	P1B5	735	7000	1050	500	367500	4.88	1	1024	30	16	0.533333	0.278639
34	P1B5	735	7000	1050	500	367500	5.72	2	1201	30	18	0.6	0.326803
35	P1B5	735	7000	1050	500	367500	3.81	0	801	30	12	0.4	0.217959
36	P1B5	735	7000	1050	500	367500	2.21	1	465	30	20	0.666667	0.126531
37	P1B5	735	7000	1050	500	367500	3.05	0	641	30	18	0.6	0.174422
38	P1B5	735	7000	1050	500	367500	1.58	1	332	30	16	0.533333	0.0903401
39	P1B5	735	7000	1050	500	367500	1.42	0	298	30	22	0.733333	0.0810884

## Sheet: A.ludens_per_trap
id	type	lat	long	week	density	n	polygon
3001	conveyor	21.903	-100.034	1	2000	14	P1B5
3002	conveyor	21.9032	-100.03	1	2000	18	P1B5
3003	conveyor	21.9032	-100.027	1	2000	12	P1B5
3004	conveyor	21.9088	-100.034	1	2000	3	P1B5
3005	conveyor	21.9091	-100.031	1	2000	15	P1B5
3006	conveyor	21.9101	-100.026	1	2000	0	P1B5
3007	conveyor	21.9149	-100.033	1	2000	14	P1B5
3008	conveyor	21.9139	21.9139	1	2000	2	P1B5
3009	conveyor	21.9139	-100.026	1	2000	10	P1B5
3010	conveyor	21.9205	-100.036	1	2000	9	P1B5
3011	conveyor	21.9202	-100.031	1	2000	21	P1B5
3012	conveyor	21.9198	-100.027	1	2000	25	P1B5
3013	conveyor	21.9249	-100.035	1	2000	19	P1B5
3014	conveyor	21.9244	-100.032	1	2000	18	P1B5
3015	conveyor	21.9241	-100.026	1	2000	20	P1B5
3016	conveyor	21.9298	-100.035	1	2000	14	P1B5
3017	conveyor	21.9287	-100.031	1	2000	6	P1B5
3018	conveyor	21.9284	-100.026	1	2000	0	P1B5
3019	conveyor	21.9381	-100.035	1	2000	7	P1B5
3020	conveyor	21.9372	-100.029	1	2000	0	P1B5
3021	conveyor	21.9374	-100.026	1	2000	16	P1B5
3022	conveyor	21.9463	-100.036	1	2000	0	P1B5
3023	conveyor	21.9458	-100.031	1	2000	45	P1B5
3024	conveyor	21.9452	-100.026	1	2000	23	P1B5
3025	conveyor	21.9503	-100.034	1	2000	0	P1B5
3026	conveyor	21.9515	-100.03	1	2000	45	P1B5
3027	conveyor	21.9521	-100.027	1	2000	56	P1B5
3028	conveyor	21.9598	-100.034	1	2000	28	P1B5
3029	conveyor	21.9584	-100.031	1	2000	39	P1B5
3030	conveyor	21.9576	-100.027	1	2000	41	P1B5
3001	conveyor	21.903	-100.034	2	2000	3	P1B5
3002	conveyor	21.9032	-100.03	2	2000	5	P1B5
3003	conveyor	21.9032	-100.027	2	2000	3	P1B5
3004	conveyor	21.9088	-100.034	2	2000	0	P1B5
3005	conveyor	21.9091	-100.031	2	2000	3	P1B5
3006	conveyor	21.9101	-100.026	2	2000	5	P1B5
3007	conveyor	21.9149	-100.033	2	2000	3	P1B5
3008	conveyor	21.9139	21.9139	2	2000	1	P1B5
3009	conveyor	21.9139	-100.026	2	2000	2	P1B5
3010	conveyor	21.9205	-100.036	2	2000	0	P1B5
3011	conveyor	21.9202	-100.031	2	2000	1	P1B5
3012	conveyor	21.9198	-100.027	2	2000	5	P1B5
3013	conveyor	21.9249	-100.035	2	2000	2	P1B5
3014	conveyor	21.9244	-100.032	2	2000	6	P1B5
3015	conveyor	21.9241	-100.026	2	2000	4	P1B5
3016	conveyor	21.9298	-100.035	2	2000	5	P1B5
3017	conveyor	21.9287	-100.031	2	2000	2	P1B5
3018	conveyor	21.9284	-100.026	2	2000	0	P1B5
3019	conveyor	21.9381	-100.035	2	2000	2	P1B5
3020	conveyor	21.9372	-100.029	2	2000	3	P1B5
3021	conveyor	21.9374	-100.026	2	2000	8	P1B5
3022	conveyor	21.9463	-100.036	2	2000	7	P1B5
3023	conveyor	21.9458	-100.031	2	2000	4	P1B5
3024	conveyor	21.9452	-100.026	2	2000	2	P1B5
3025	conveyor	21.9503	-100.034	2	2000	5	P1B5
3026	conveyor	21.9515	-100.03	2	2000	4	P1B5
3027	conveyor	21.9521	-100.027	2	2000	0	P1B5
3028	conveyor	21.9598	-100.034	2	2000	4	P1B5
3029	conveyor	21.9584	-100.031	2	2000	7	P1B5
3030	conveyor	21.9576	-100.027	2	2000	5	P1B5
3001	conveyor	21.903	-100.034	3	2000	21	P1B5
3002	conveyor	21.9032	-100.03	3	2000	25	P1B5
3003	conveyor	21.9032	-100.027	3	2000	19	P1B5
3004	conveyor	21.9088	-100.034	3	2000	30	P1B5
3005	conveyor	21.9091	-100.031	3	2000	31	P1B5
3006	conveyor	21.9101	-100.026	3	2000	25	P1B5
3007	conveyor	21.9149	-100.033	3	2000	34	P1B5
3008	conveyor	21.9139	21.9139	3	2000	34	P1B5
3009	conveyor	21.9139	-100.026	3	2000	31	P1B5
3010	conveyor	21.9205	-100.036	3	2000	38	P1B5
3011	conveyor	21.9202	-100.031	3	2000	26	P1B5
3012	conveyor	21.9198	-100.027	3	2000	0	P1B5
3013	conveyor	21.9249	-100.035	3	2000	22	P1B5
3014	conveyor	21.9244	-100.032	3	2000	20	P1B5
3015	conveyor	21.9241	-100.026	3	2000	35	P1B5
3016	conveyor	21.9298	-100.035	3	2000	26	P1B5
3017	conveyor	21.9287	-100.031	3	2000	30	P1B5
3018	conveyor	21.9284	-100.026	3	2000	13	P1B5
3019	conveyor	21.9381	-100.035	3	2000	25	P1B5
3020	conveyor	21.9372	-100.029	3	2000	27	P1B5
3021	conveyor	21.9374	-100.026	3	2000	24	P1B5
3022	conveyor	21.9463	-100.036	3	2000	32	P1B5
3023	conveyor	21.9458	-100.031	3	2000	15	P1B5
3024	conveyor	21.9452	-100.026	3	2000	27	P1B5
3025	conveyor	21.9503	-100.034	3	2000	22	P1B5
3026	conveyor	21.9515	-100.03	3	2000	24	P1B5
3027	conveyor	21.9521	-100.027	3	2000	23	P1B5
3028	conveyor	21.9598	-100.034	3	2000	31	P1B5
3029	conveyor	21.9584	-100.031	3	2000	28	P1B5
3030	conveyor	21.9576	-100.027	3	2000	32	P1B5
3001	conveyor	21.903	-100.034	4	2000	5	P1B5
3002	conveyor	21.9032	-100.03	4	2000	6	P1B5
3003	conveyor	21.9032	-100.027	4	2000	4	P1B5
3004	conveyor	21.9088	-100.034	4	2000	8	P1B5
3005	conveyor	21.9091	-100.031	4	2000	2	P1B5
3006	conveyor	21.9101	-100.026	4	2000	8	P1B5
3007	conveyor	21.9149	-100.033	4	2000	6	P1B5
3008	conveyor	21.9139	21.9139	4	2000	9	P1B5
3009	conveyor	21.9139	-100.026	4	2000	5	P1B5
3010	conveyor	21.9205	-100.036	4	2000	7	P1B5
3011	conveyor	21.9202	-100.031	4	2000	3	P1B5
3012	conveyor	21.9198	-100.027	4	2000	4	P1B5
3013	conveyor	21.9249	-100.035	4	2000	2	P1B5
3014	conveyor	21.9244	-100.032	4	2000	5	P1B5
3015	conveyor	21.9241	-100.026	4	2000	11	P1B5
3016	conveyor	21.9298	-100.035	4	2000	9	P1B5
3017	conveyor	21.9287	-100.031	4	2000	8	P1B5
3018	conveyor	21.9284	-100.026	4	2000	0	P1B5
3019	conveyor	21.9381	-100.035	4	2000	2	P1B5
3020	conveyor	21.9372	-100.029	4	2000	4	P1B5
3021	conveyor	21.9374	-100.026	4	2000	3	P1B5
3022	conveyor	21.9463	-100.036	4	2000	6	P1B5
3023	conveyor	21.9458	-100.031	4	2000	7	P1B5
3024	conveyor	21.9452	-100.026	4	2000	6	P1B5
3025	conveyor	21.9503	-100.034	4	2000	4	P1B5
3026	conveyor	21.9515	-100.03	4	2000	6	P1B5
3027	conveyor	21.9521	-100.027	4	2000	5	P1B5
3028	conveyor	21.9598	-100.034	4	2000	4	P1B5
3029	conveyor	21.9584	-100.031	4	2000	12	P1B5
3030	conveyor	21.9576	-100.027	4	2000	16	P1B5
3001	conveyor	21.903	-100.034	5	2000	8	P1B5
3002	conveyor	21.9032	-100.03	5	2000	0	P1B5
3003	conveyor	21.9032	-100.027	5	2000	7	P1B5
3004	conveyor	21.9088	-100.034	5	2000	6	P1B5
3005	conveyor	21.9091	-100.031	5	2000	5	P1B5
3006	conveyor	21.9101	-100.026	5	2000	0	P1B5
3007	conveyor	21.9149	-100.033	5	2000	3	P1B5
3008	conveyor	21.9139	21.9139	5	2000	4	P1B5
3009	conveyor	21.9139	-100.026	5	2000	9	P1B5
3010	conveyor	21.9205	-100.036	5	2000	5	P1B5
3011	conveyor	21.9202	-100.031	5	2000	4	P1B5
3012	conveyor	21.9198	-100.027	5	2000	0	P1B5
3013	conveyor	21.9249	-100.035	5	2000	4	P1B5
3014	conveyor	21.9244	-100.032	5	2000	3	P1B5
3015	conveyor	21.9241	-100.026	5	2000	4	P1B5
3016	conveyor	21.9298	-100.035	5	2000	2	P1B5
3017	conveyor	21.9287	-100.031	5	2000	5	P1B5
3018	conveyor	21.9284	-100.026	5	2000	4	P1B5
3019	conveyor	21.9381	-100.035	5	2000	7	P1B5
3020	conveyor	21.9372	-100.029	5	2000	3	P1B5
3021	conveyor	21.9374	-100.026	5	2000	2	P1B5
3022	conveyor	21.9463	-100.036	5	2000	5	P1B5
3023	conveyor	21.9458	-100.031	5	2000	0	P1B5
3024	conveyor	21.9452	-100.026	5	2000	4	P1B5
3025	conveyor	21.9503	-100.034	5	2000	3	P1B5
3026	conveyor	21.9515	-100.03	5	2000	4	P1B5
3027	conveyor	21.9521	-100.027	5	2000	6	P1B5
3028	conveyor	21.9598	-100.034	5	2000	0	P1B5
3029	conveyor	21.9584	-100.031	5	2000	3	P1B5
3030	conveyor	21.9576	-100.027	5	2000	5	P1B5
3001	conveyor	21.903	-100.034	6	2000	19	P1B5
3002	conveyor	21.9032	-100.03	6	2000	8	P1B5
3003	conveyor	21.9032	-100.027	6	2000	12	P1B5
3004	conveyor	21.9088	-100.034	6	2000	17	P1B5
3005	conveyor	21.9091	-100.031	6	2000	14	P1B5
3006	conveyor	21.9101	-100.026	6	2000	10	P1B5
3007	conveyor	21.9149	-100.033	6	2000	9	P1B5
3008	conveyor	21.9139	21.9139	6	2000	17	P1B5
3009	conveyor	21.9139	-100.026	6	2000	6	P1B5
3010	conveyor	21.9205	-100.036	6	2000	5	P1B5
3011	conveyor	21.9202	-100.031	6	2000	8	P1B5
3012	conveyor	21.9198	-100.027	6	2000	11	P1B5
3013	conveyor	21.9249	-100.035	6	2000	12	P1B5
3014	conveyor	21.9244	-100.032	6	2000	14	P1B5
3015	conveyor	21.9241	-100.026	6	2000	13	P1B5
3016	conveyor	21.9298	-100.035	6	2000	3	P1B5
3017	conveyor	21.9287	-100.031	6	2000	5	P1B5
3018	conveyor	21.9284	-100.026	6	2000	16	P1B5
3019	conveyor	21.9381	-100.035	6	2000	18	P1B5
3020	conveyor	21.9372	-100.029	6	2000	11	P1B5
3021	conveyor	21.9374	-100.026	6	2000	9	P1B5
3022	conveyor	21.9463	-100.036	6	2000	8	P1B5
3023	conveyor	21.9458	-100.031	6	2000	6	P1B5
3024	conveyor	21.9452	-100.026	6	2000	5	P1B5
3025	conveyor	21.9503	-100.034	6	2000	12	P1B5
3026	conveyor	21.9515	-100.03	6	2000	8	P1B5
3027	conveyor	21.9521	-100.027	6	2000	13	P1B5
3028	conveyor	21.9598	-100.034	6	2000	8	P1B5
3029	conveyor	21.9584	-100.031	6	2000	7	P1B5
3030	conveyor	21.9576	-100.027	6	2000	11	P1B5
3001	conveyor	21.903	-100.034	7	2000	15	P1B5
3002	conveyor	21.9032	-100.03	7	2000	17	P1B5
3003	conveyor	21.9032	-100.027	7	2000	11	P1B5
3004	conveyor	21.9088	-100.034	7	2000	26	P1B5
3005	conveyor	21.9091	-100.031	7	2000	18	P1B5
3006	conveyor	21.9101	-100.026	7	2000	25	P1B5
3007	conveyor	21.9149	-100.033	7	2000	12	P1B5
3008	conveyor	21.9139	21.9139	7	2000	21	P1B5
3009	conveyor	21.9139	-100.026	7	2000	19	P1B5
3010	conveyor	21.9205	-100.036	7	2000	28	P1B5
3011	conveyor	21.9202	-100.031	7	2000	12	P1B5
3012	conveyor	21.9198	-100.027	7	2000	11	P1B5
3013	conveyor	21.9249	-100.035	7	2000	28	P1B5
3014	conveyor	21.9244	-100.032	7	2000	10	P1B5
3015	conveyor	21.9241	-100.026	7	2000	0	P1B5
3016	conveyor	21.9298	-100.035	7	2000	12	P1B5
3017	conveyor	21.9287	-100.031	7	2000	15	P1B5
3018	conveyor	21.9284	-100.026	7	2000	18	P1B5
3019	conveyor	21.9381	-100.035	7	2000	0	P1B5
3020	conveyor	21.9372	-100.029	7	2000	13	P1B5
3021	conveyor	21.9374	-100.026	7	2000	16	P1B5
3022	conveyor	21.9463	-100.036	7	2000	0	P1B5
3023	conveyor	21.9458	-100.031	7	2000	9	P1B5
3024	conveyor	21.9452	-100.026	7	2000	16	P1B5
3025	conveyor	21.9503	-100.034	7	2000	15	P1B5
3026	conveyor	21.9515	-100.03	7	2000	17	P1B5
3027	conveyor	21.9521	-100.027	7	2000	13	P1B5
3028	conveyor	21.9598	-100.034	7	2000	19	P1B5
3029	conveyor	21.9584	-100.031	7	2000	18	P1B5
3030	conveyor	21.9576	-100.027	7	2000	16	P1B5
3001	conveyor	21.903	-100.034	8	2000	31	P1B5
3002	conveyor	21.9032	-100.03	8	2000	28	P1B5
3003	conveyor	21.9032	-100.027	8	2000	35	P1B5
3004	conveyor	21.9088	-100.034	8	2000	37	P1B5
3005	conveyor	21.9091	-100.031	8	2000	26	P1B5
3006	conveyor	21.9101	-100.026	8	2000	0	P1B5
3007	conveyor	21.9149	-100.033	8	2000	22	P1B5
3008	conveyor	21.9139	21.9139	8	2000	34	P1B5
3009	conveyor	21.9139	-100.026	8	2000	16	P1B5
3010	conveyor	21.9205	-100.036	8	2000	28	P1B5
3011	conveyor	21.9202	-100.031	8	2000	0	P1B5
3012	conveyor	21.9198	-100.027	8	2000	29	P1B5
3013	conveyor	21.9249	-100.035	8	2000	35	P1B5
3014	conveyor	21.9244	-100.032	8	2000	36	P1B5
3015	conveyor	21.9241	-100.026	8	2000	25	P1B5
3016	conveyor	21.9298	-100.035	8	2000	27	P1B5
3017	conveyor	21.9287	-100.031	8	2000	20	P1B5
3018	conveyor	21.9284	-100.026	8	2000	19	P1B5
3019	conveyor	21.9381	-100.035	8	2000	36	P1B5
3020	conveyor	21.9372	-100.029	8	2000	51	P1B5
3021	conveyor	21.9374	-100.026	8	2000	29	P1B5
3022	conveyor	21.9463	-100.036	8	2000	18	P1B5
3023	conveyor	21.9458	-100.031	8	2000	29	P1B5
3024	conveyor	21.9452	-100.026	8	2000	25	P1B5
3025	conveyor	21.9503	-100.034	8	2000	31	P1B5
3026	conveyor	21.9515	-100.03	8	2000	30	P1B5
3027	conveyor	21.9521	-100.027	8	2000	29	P1B5
3028	conveyor	21.9598	-100.034	8	2000	22	P1B5
3029	conveyor	21.9584	-100.031	8	2000	35	P1B5
3030	conveyor	21.9576	-100.027	8	2000	33	P1B5
3001	conveyor	21.903	-100.034	9	2000	41	P1B5
3002	conveyor	21.9032	-100.03	9	2000	49	P1B5
3003	conveyor	21.9032	-100.027	9	2000	0	P1B5
3004	conveyor	21.9088	-100.034	9	2000	59	P1B5
3005	conveyor	21.9091	-100.031	9	2000	36	P1B5
3006	conveyor	21.9101	-100.026	9	2000	45	P1B5
3007	conveyor	21.9149	-100.033	9	2000	31	P1B5
3008	conveyor	21.9139	21.9139	9	2000	28	P1B5
3009	conveyor	21.9139	-100.026	9	2000	33	P1B5
3010	conveyor	21.9205	-100.036	9	2000	24	P1B5
3011	conveyor	21.9202	-100.031	9	2000	39	P1B5
3012	conveyor	21.9198	-100.027	9	2000	27	P1B5
3013	conveyor	21.9249	-100.035	9	2000	0	P1B5
3014	conveyor	21.9244	-100.032	9	2000	56	P1B5
3015	conveyor	21.9241	-100.026	9	2000	0	P1B5
3016	conveyor	21.9298	-100.035	9	2000	62	P1B5
3017	conveyor	21.9287	-100.031	9	2000	0	P1B5
3018	conveyor	21.9284	-100.026	9	2000	32	P1B5
3019	conveyor	21.9381	-100.035	9	2000	15	P1B5
3020	conveyor	21.9372	-100.029	9	2000	18	P1B5
3021	conveyor	21.9374	-100.026	9	2000	65	P1B5
3022	conveyor	21.9463	-100.036	9	2000	62	P1B5
3023	conveyor	21.9458	-100.031	9	2000	0	P1B5
3024	conveyor	21.9452	-100.026	9	2000	42	P1B5
3025	conveyor	21.9503	-100.034	9	2000	61	P1B5
3026	conveyor	21.9515	-100.03	9	2000	51	P1B5
3027	conveyor	21.9521	-100.027	9	2000	33	P1B5
3028	conveyor	21.9598	-100.034	9	2000	0	P1B5
3029	conveyor	21.9584	-100.031	9	2000	42	P1B5
3030	conveyor	21.9576	-100.027	9	2000	36	P1B5
3001	conveyor	21.903	-100.034	10	2000	35	P1B5
3002	conveyor	21.9032	-100.03	10	2000	36	P1B5
3003	conveyor	21.9032	-100.027	10	2000	34	P1B5
3004	conveyor	21.9088	-100.034	10	2000	29	P1B5
3005	conveyor	21.9091	-100.031	10	2000	36	P1B5
3006	conveyor	21.9101	-100.026	10	2000	21	P1B5
3007	conveyor	21.9149	-100.033	10	2000	33	P1B5
3008	conveyor	21.9139	21.9139	10	2000	26	P1B5
3009	conveyor	21.9139	-100.026	10	2000	40	P1B5
3010	conveyor	21.9205	-100.036	10	2000	33	P1B5
3011	conveyor	21.9202	-100.031	10	2000	37	P1B5
3012	conveyor	21.9198	-100.027	10	2000	38	P1B5
3013	conveyor	21.9249	-100.035	10	2000	35	P1B5
3014	conveyor	21.9244	-100.032	10	2000	25	P1B5
3015	conveyor	21.9241	-100.026	10	2000	44	P1B5
3016	conveyor	21.9298	-100.035	10	2000	24	P1B5
3017	conveyor	21.9287	-100.031	10	2000	19	P1B5
3018	conveyor	21.9284	-100.026	10	2000	24	P1B5
3019	conveyor	21.9381	-100.035	10	2000	21	P1B5
3020	conveyor	21.9372	-100.029	10	2000	26	P1B5
3021	conveyor	21.9374	-100.026	10	2000	28	P1B5
3022	conveyor	21.9463	-100.036	10	2000	32	P1B5
3023	conveyor	21.9458	-100.031	10	2000	44	P1B5
3024	conveyor	21.9452	-100.026	10	2000	58	P1B5
3025	conveyor	21.9503	-100.034	10	2000	52	P1B5
3026	conveyor	21.9515	-100.03	10	2000	52	P1B5
3027	conveyor	21.9521	-100.027	10	2000	33	P1B5
3028	conveyor	21.9598	-100.034	10	2000	45	P1B5
3029	conveyor	21.9584	-100.031	10	2000	25	P1B5
3030	conveyor	21.9576	-100.027	10	2000	64	P1B5
3001	conveyor	21.903	-100.034	11	1500	0	P1B5
3002	conveyor	21.9032	-100.03	11	1500	55	P1B5
3003	conveyor	21.9032	-100.027	11	1500	64	P1B5
3004	conveyor	21.9088	-100.034	11	1500	0	P1B5
3005	conveyor	21.9091	-100.031	11	1500	62	P1B5
3006	conveyor	21.9101	-100.026	11	1500	18	P1B5
3007	conveyor	21.9149	-100.033	11	1500	45	P1B5
3008	conveyor	21.9139	21.9139	11	1500	75	P1B5
3009	conveyor	21.9139	-100.026	11	1500	35	P1B5
3010	conveyor	21.9205	-100.036	11	1500	0	P1B5
3011	conveyor	21.9202	-100.031	11	1500	67	P1B5
3012	conveyor	21.9198	-100.027	11	1500	48	P1B5
3013	conveyor	21.9249	-100.035	11	1500	81	P1B5
3014	conveyor	21.9244	-100.032	11	1500	21	P1B5
3015	conveyor	21.9241	-100.026	11	1500	33	P1B5
3016	conveyor	21.9298	-100.035	11	1500	0	P1B5
3017	conveyor	21.9287	-100.031	11	1500	78	P1B5
3018	conveyor	21.9284	-100.026	11	1500	0	P1B5
3019	conveyor	21.9381	-100.035	11	1500	101	P1B5
3020	conveyor	21.9372	-100.029	11	1500	25	P1B5
3021	conveyor	21.9374	-100.026	11	1500	12	P1B5
3022	conveyor	21.9463	-100.036	11	1500	0	P1B5
3023	conveyor	21.9458	-100.031	11	1500	0	P1B5
3024	conveyor	21.9452	-100.026	11	1500	56	P1B5
3025	conveyor	21.9503	-100.034	11	1500	81	P1B5
3026	conveyor	21.9515	-100.03	11	1500	74	P1B5
3027	conveyor	21.9521	-100.027	11	1500	12	P1B5
3028	conveyor	21.9598	-100.034	11	1500	85	P1B5
3029	conveyor	21.9584	-100.031	11	1500	46	P1B5
3030	conveyor	21.9576	-100.027	11	1500	81	P1B5
3001	conveyor	21.903	-100.034	12	1500	22	P1B5
3002	conveyor	21.9032	-100.03	12	1500	12	P1B5
3003	conveyor	21.9032	-100.027	12	1500	8	P1B5
3004	conveyor	21.9088	-100.034	12	1500	15	P1B5
3005	conveyor	21.9091	-100.031	12	1500	0	P1B5
3006	conveyor	21.9101	-100.026	12	1500	35	P1B5
3007	conveyor	21.9149	-100.033	12	1500	0	P1B5
3008	conveyor	21.9139	21.9139	12	1500	25	P1B5
3009	conveyor	21.9139	-100.026	12	1500	14	P1B5
3010	conveyor	21.9205	-100.036	12	1500	2	P1B5
3011	conveyor	21.9202	-100.031	12	1500	18	P1B5
3012	conveyor	21.9198	-100.027	12	1500	33	P1B5
3013	conveyor	21.9249	-100.035	12	1500	0	P1B5
3014	conveyor	21.9244	-100.032	12	1500	52	P1B5
3015	conveyor	21.9241	-100.026	12	1500	14	P1B5
3016	conveyor	21.9298	-100.035	12	1500	0	P1B5
3017	conveyor	21.9287	-100.031	12	1500	22	P1B5
3018	conveyor	21.9284	-100.026	12	1500	8	P1B5
3019	conveyor	21.9381	-100.035	12	1500	4	P1B5
3020	conveyor	21.9372	-100.029	12	1500	0	P1B5
3021	conveyor	21.9374	-100.026	12	1500	3	P1B5
3022	conveyor	21.9463	-100.036	12	1500	41	P1B5
3023	conveyor	21.9458	-100.031	12	1500	13	P1B5
3024	conveyor	21.9452	-100.026	12	1500	30	P1B5
3025	conveyor	21.9503	-100.034	12	1500	17	P1B5
3026	conveyor	21.9515	-100.03	12	1500	8	P1B5
3027	conveyor	21.9521	-100.027	12	1500	6	P1B5
3028	conveyor	21.9598	-100.034	12	1500	45	P1B5
3029	conveyor	21.9584	-100.031	12	1500	0	P1B5
3030	conveyor	21.9576	-100.027	12	1500	12	P1B5
3001	conveyor	21.903	-100.034	13	1500	18	P1B5
3002	conveyor	21.9032	-100.03	13	1500	25	P1B5
3003	conveyor	21.9032	-100.027	13	1500	22	P1B5
3004	conveyor	21.9088	-100.034	13	1500	18	P1B5
3005	conveyor	21.9091	-100.031	13	1500	13	P1B5
3006	conveyor	21.9101	-100.026	13	1500	36	P1B5
3007	conveyor	21.9149	-100.033	13	1500	26	P1B5
3008	conveyor	21.9139	21.9139	13	1500	62	P1B5
3009	conveyor	21.9139	-100.026	13	1500	35	P1B5
3010	conveyor	21.9205	-100.036	13	1500	33	P1B5
3011	conveyor	21.9202	-100.031	13	1500	48	P1B5
3012	conveyor	21.9198	-100.027	13	1500	27	P1B5
3013	conveyor	21.9249	-100.035	13	1500	32	P1B5
3014	conveyor	21.9244	-100.032	13	1500	16	P1B5
3015	conveyor	21.9241	-100.026	13	1500	14	P1B5
3016	conveyor	21.9298	-100.035	13	1500	41	P1B5
3017	conveyor	21.9287	-100.031	13	1500	25	P1B5
3018	conveyor	21.9284	-100.026	13	1500	14	P1B5
3019	conveyor	21.9381	-100.035	13	1500	32	P1B5
3020	conveyor	21.9372	-100.029	13	1500	46	P1B5
3021	conveyor	21.9374	-100.026	13	1500	0	P1B5
3022	conveyor	21.9463	-100.036	13	1500	75	P1B5
3023	conveyor	21.9458	-100.031	13	1500	58	P1B5
3024	conveyor	21.9452	-100.026	13	1500	36	P1B5
3025	conveyor	21.9503	-100.034	13	1500	61	P1B5
3026	conveyor	21.9515	-100.03	13	1500	66	P1B5
3027	conveyor	21.9521	-100.027	13	1500	14	P1B5
3028	conveyor	21.9598	-100.034	13	1500	43	P1B5
3029	conveyor	21.9584	-100.031	13	1500	27	P1B5
3030	conveyor	21.9576	-100.027	13	1500	35	P1B5
3001	conveyor	21.903	-100.034	14	1500	2	P1B5
3002	conveyor	21.9032	-100.03	14	1500	14	P1B5
3003	conveyor	21.9032	-100.027	14	1500	16	P1B5
3004	conveyor	21.9088	-100.034	14	1500	12	P1B5
3005	conveyor	21.9091	-100.031	14	1500	6	P1B5
3006	conveyor	21.9101	-100.026	14	1500	4	P1B5
3007	conveyor	21.9149	-100.033	14	1500	15	P1B5
3008	conveyor	21.9139	21.9139	14	1500	21	P1B5
3009	conveyor	21.9139	-100.026	14	1500	2	P1B5
3010	conveyor	21.9205	-100.036	14	1500	16	P1B5
3011	conveyor	21.9202	-100.031	14	1500	21	P1B5
3012	conveyor	21.9198	-100.027	14	1500	8	P1B5
3013	conveyor	21.9249	-100.035	14	1500	22	P1B5
3014	conveyor	21.9244	-100.032	14	1500	19	P1B5
3015	conveyor	21.9241	-100.026	14	1500	4	P1B5
3016	conveyor	21.9298	-100.035	14	1500	13	P1B5
3017	conveyor	21.9287	-100.031	14	1500	15	P1B5
3018	conveyor	21.9284	-100.026	14	1500	17	P1B5
3019	conveyor	21.9381	-100.035	14	1500	21	P1B5
3020	conveyor	21.9372	-100.029	14	1500	2	P1B5
3021	conveyor	21.9374	-100.026	14	1500	3	P1B5
3022	conveyor	21.9463	-100.036	14	1500	5	P1B5
3023	conveyor	21.9458	-100.031	14	1500	2	P1B5
3024	conveyor	21.9452	-100.026	14	1500	2	P1B5
3025	conveyor	21.9503	-100.034	14	1500	16	P1B5
3026	conveyor	21.9515	-100.03	14	1500	9	P1B5
3027	conveyor	21.9521	-100.027	14	1500	8	P1B5
3028	conveyor	21.9598	-100.034	14	1500	5	P1B5
3029	conveyor	21.9584	-100.031	14	1500	4	P1B5
3030	conveyor	21.9576	-100.027	14	1500	3	P1B5
3001	conveyor	21.903	-100.034	15	1500	37	P1B5
3002	conveyor	21.9032	-100.03	15	1500	29	P1B5
3003	conveyor	21.9032	-100.027	15	1500	0	P1B5
3004	conveyor	21.9088	-100.034	15	1500	52	P1B5
3005	conveyor	21.9091	-100.031	15	1500	54	P1B5
3006	conveyor	21.9101	-100.026	15	1500	22	P1B5
3007	conveyor	21.9149	-100.033	15	1500	0	P1B5
3008	conveyor	21.9139	21.9139	15	1500	6	P1B5
3009	conveyor	21.9139	-100.026	15	1500	7	P1B5
3010	conveyor	21.9205	-100.036	15	1500	0	P1B5
3011	conveyor	21.9202	-100.031	15	1500	19	P1B5
3012	conveyor	21.9198	-100.027	15	1500	3	P1B5
3013	conveyor	21.9249	-100.035	15	1500	0	P1B5
3014	conveyor	21.9244	-100.032	15	1500	19	P1B5
3015	conveyor	21.9241	-100.026	15	1500	43	P1B5
3016	conveyor	21.9298	-100.035	15	1500	29	P1B5
3017	conveyor	21.9287	-100.031	15	1500	0	P1B5
3018	conveyor	21.9284	-100.026	15	1500	12	P1B5
3019	conveyor	21.9381	-100.035	15	1500	45	P1B5
3020	conveyor	21.9372	-100.029	15	1500	12	P1B5
3021	conveyor	21.9374	-100.026	15	1500	11	P1B5
3022	conveyor	21.9463	-100.036	15	1500	25	P1B5
3023	conveyor	21.9458	-100.031	15	1500	38	P1B5
3024	conveyor	21.9452	-100.026	15	1500	44	P1B5
3025	conveyor	21.9503	-100.034	15	1500	63	P1B5
3026	conveyor	21.9515	-100.03	15	1500	25	P1B5
3027	conveyor	21.9521	-100.027	15	1500	47	P1B5
3028	conveyor	21.9598	-100.034	15	1500	65	P1B5
3029	conveyor	21.9584	-100.031	15	1500	64	P1B5
3030	conveyor	21.9576	-100.027	15	1500	33	P1B5
3001	conveyor	21.903	-100.034	16	1500	32	P1B5
3002	conveyor	21.9032	-100.03	16	1500	0	P1B5
3003	conveyor	21.9032	-100.027	16	1500	24	P1B5
3004	conveyor	21.9088	-100.034	16	1500	15	P1B5
3005	conveyor	21.9091	-100.031	16	1500	31	P1B5
3006	conveyor	21.9101	-100.026	16	1500	30	P1B5
3007	conveyor	21.9149	-100.033	16	1500	29	P1B5
3008	conveyor	21.9139	21.9139	16	1500	0	P1B5
3009	conveyor	21.9139	-100.026	16	1500	14	P1B5
3010	conveyor	21.9205	-100.036	16	1500	6	P1B5
3011	conveyor	21.9202	-100.031	16	1500	25	P1B5
3012	conveyor	21.9198	-100.027	16	1500	0	P1B5
3013	conveyor	21.9249	-100.035	16	1500	23	P1B5
3014	conveyor	21.9244	-100.032	16	1500	21	P1B5
3015	conveyor	21.9241	-100.026	16	1500	12	P1B5
3016	conveyor	21.9298	-100.035	16	1500	21	P1B5
3017	conveyor	21.9287	-100.031	16	1500	39	P1B5
3018	conveyor	21.9284	-100.026	16	1500	18	P1B5
3019	conveyor	21.9381	-100.035	16	1500	16	P1B5
3020	conveyor	21.9372	-100.029	16	1500	24	P1B5
3021	conveyor	21.9374	-100.026	16	1500	0	P1B5
3022	conveyor	21.9463	-100.036	16	1500	17	P1B5
3023	conveyor	21.9458	-100.031	16	1500	3	P1B5
3024	conveyor	21.9452	-100.026	16	1500	6	P1B5
3025	conveyor	21.9503	-100.034	16	1500	25	P1B5
3026	conveyor	21.9515	-100.03	16	1500	0	P1B5
3027	conveyor	21.9521	-100.027	16	1500	32	P1B5
3028	conveyor	21.9598	-100.034	16	1500	25	P1B5
3029	conveyor	21.9584	-100.031	16	1500	29	P1B5
3030	conveyor	21.9576	-100.027	16	1500	34	P1B5
3001	conveyor	21.903	-100.034	17	1500	32	P1B5
3002	conveyor	21.9032	-100.03	17	1500	10	P1B5
3003	conveyor	21.9032	-100.027	17	1500	14	P1B5
3004	conveyor	21.9088	-100.034	17	1500	6	P1B5
3005	conveyor	21.9091	-100.031	17	1500	12	P1B5
3006	conveyor	21.9101	-100.026	17	1500	25	P1B5
3007	conveyor	21.9149	-100.033	17	1500	34	P1B5
3008	conveyor	21.9139	21.9139	17	1500	23	P1B5
3009	conveyor	21.9139	-100.026	17	1500	6	P1B5
3010	conveyor	21.9205	-100.036	17	1500	14	P1B5
3011	conveyor	21.9202	-100.031	17	1500	21	P1B5
3012	conveyor	21.9198	-100.027	17	1500	6	P1B5
3013	conveyor	21.9249	-100.035	17	1500	11	P1B5
3014	conveyor	21.9244	-100.032	17	1500	9	P1B5
3015	conveyor	21.9241	-100.026	17	1500	17	P1B5
3016	conveyor	21.9298	-100.035	17	1500	24	P1B5
3017	conveyor	21.9287	-100.031	17	1500	30	P1B5
3018	conveyor	21.9284	-100.026	17	1500	26	P1B5
3019	conveyor	21.9381	-100.035	17	1500	12	P1B5
3020	conveyor	21.9372	-100.029	17	1500	2	P1B5
3021	conveyor	21.9374	-100.026	17	1500	17	P1B5
3022	conveyor	21.9463	-100.036	17	1500	0	P1B5
3023	conveyor	21.9458	-100.031	17	1500	9	P1B5
3024	conveyor	21.9452	-100.026	17	1500	53	P1B5
3025	conveyor	21.9503	-100.034	17	1500	68	P1B5
3026	conveyor	21.9515	-100.03	17	1500	0	P1B5
3027	conveyor	21.9521	-100.027	17	1500	54	P1B5
3028	conveyor	21.9598	-100.034	17	1500	38	P1B5
3029	conveyor	21.9584	-100.031	17	1500	0	P1B5
3030	conveyor	21.9576	-100.027	17	1500	29	P1B5
3001	conveyor	21.903	-100.034	18	1500	6	P1B5
3002	conveyor	21.9032	-100.03	18	1500	21	P1B5
3003	conveyor	21.9032	-100.027	18	1500	15	P1B5
3004	conveyor	21.9088	-100.034	18	1500	14	P1B5
3005	conveyor	21.9091	-100.031	18	1500	1	P1B5
3006	conveyor	21.9101	-100.026	18	1500	4	P1B5
3007	conveyor	21.9149	-100.033	18	1500	30	P1B5
3008	conveyor	21.9139	21.9139	18	1500	21	P1B5
3009	conveyor	21.9139	-100.026	18	1500	0	P1B5
3010	conveyor	21.9205	-100.036	18	1500	6	P1B5
3011	conveyor	21.9202	-100.031	18	1500	5	P1B5
3012	conveyor	21.9198	-100.027	18	1500	3	P1B5
3013	conveyor	21.9249	-100.035	18	1500	1	P1B5
3014	conveyor	21.9244	-100.032	18	1500	0	P1B5
3015	conveyor	21.9241	-100.026	18	1500	26	P1B5
3016	conveyor	21.9298	-100.035	18	1500	6	P1B5
3017	conveyor	21.9287	-100.031	18	1500	2	P1B5
3018	conveyor	21.9284	-100.026	18	1500	24	P1B5
3019	conveyor	21.9381	-100.035	18	1500	16	P1B5
3020	conveyor	21.9372	-100.029	18	1500	5	P1B5
3021	conveyor	21.9374	-100.026	18	1500	35	P1B5
3022	conveyor	21.9463	-100.036	18	1500	26	P1B5
3023	conveyor	21.9458	-100.031	18	1500	15	P1B5
3024	conveyor	21.9452	-100.026	18	1500	6	P1B5
3025	conveyor	21.9503	-100.034	18	1500	32	P1B5
3026	conveyor	21.9515	-100.03	18	1500	21	P1B5
3027	conveyor	21.9521	-100.027	18	1500	5	P1B5
3028	conveyor	21.9598	-100.034	18	1500	18	P1B5
3029	conveyor	21.9584	-100.031	18	1500	36	P1B5
3030	conveyor	21.9576	-100.027	18	1500	25	P1B5
3001	conveyor	21.903	-100.034	19	1500	25	P1B5
3002	conveyor	21.9032	-100.03	19	1500	24	P1B5
3003	conveyor	21.9032	-100.027	19	1500	19	P1B5
3004	conveyor	21.9088	-100.034	19	1500	35	P1B5
3005	conveyor	21.9091	-100.031	19	1500	19	P1B5
3006	conveyor	21.9101	-100.026	19	1500	18	P1B5
3007	conveyor	21.9149	-100.033	19	1500	23	P1B5
3008	conveyor	21.9139	21.9139	19	1500	30	P1B5
3009	conveyor	21.9139	-100.026	19	1500	26	P1B5
3010	conveyor	21.9205	-100.036	19	1500	28	P1B5
3011	conveyor	21.9202	-100.031	19	1500	19	P1B5
3012	conveyor	21.9198	-100.027	19	1500	21	P1B5
3013	conveyor	21.9249	-100.035	19	1500	25	P1B5
3014	conveyor	21.9244	-100.032	19	1500	27	P1B5
3015	conveyor	21.9241	-100.026	19	1500	30	P1B5
3016	conveyor	21.9298	-100.035	19	1500	22	P1B5
3017	conveyor	21.9287	-100.031	19	1500	35	P1B5
3018	conveyor	21.9284	-100.026	19	1500	33	P1B5
3019	conveyor	21.9381	-100.035	19	1500	46	P1B5
3020	conveyor	21.9372	-100.029	19	1500	25	P1B5
3021	conveyor	21.9374	-100.026	19	1500	19	P1B5
3022	conveyor	21.9463	-100.036	19	1500	22	P1B5
3023	conveyor	21.9458	-100.031	19	1500	27	P1B5
3024	conveyor	21.9452	-100.026	19	1500	21	P1B5
3025	conveyor	21.9503	-100.034	19	1500	23	P1B5
3026	conveyor	21.9515	-100.03	19	1500	16	P1B5
3027	conveyor	21.9521	-100.027	19	1500	0	P1B5
3028	conveyor	21.9598	-100.034	19	1500	25	P1B5
3029	conveyor	21.9584	-100.031	19	1500	24	P1B5
3030	conveyor	21.9576	-100.027	19	1500	18	P1B5
3001	conveyor	21.903	-100.034	20	1500	17	P1B5
3002	conveyor	21.9032	-100.03	20	1500	16	P1B5
3003	conveyor	21.9032	-100.027	20	1500	11	P1B5
3004	conveyor	21.9088	-100.034	20	1500	10	P1B5
3005	conveyor	21.9091	-100.031	20	1500	15	P1B5
3006	conveyor	21.9101	-100.026	20	1500	10	P1B5
3007	conveyor	21.9149	-100.033	20	1500	9	P1B5
3008	conveyor	21.9139	21.9139	20	1500	11	P1B5
3009	conveyor	21.9139	-100.026	20	1500	0	P1B5
3010	conveyor	21.9205	-100.036	20	1500	12	P1B5
3011	conveyor	21.9202	-100.031	20	1500	21	P1B5
3012	conveyor	21.9198	-100.027	20	1500	0	P1B5
3013	conveyor	21.9249	-100.035	20	1500	0	P1B5
3014	conveyor	21.9244	-100.032	20	1500	19	P1B5
3015	conveyor	21.9241	-100.026	20	1500	24	P1B5
3016	conveyor	21.9298	-100.035	20	1500	20	P1B5
3017	conveyor	21.9287	-100.031	20	1500	13	P1B5
3018	conveyor	21.9284	-100.026	20	1500	19	P1B5
3019	conveyor	21.9381	-100.035	20	1500	18	P1B5
3020	conveyor	21.9372	-100.029	20	1500	11	P1B5
3021	conveyor	21.9374	-100.026	20	1500	26	P1B5
3022	conveyor	21.9463	-100.036	20	1500	0	P1B5
3023	conveyor	21.9458	-100.031	20	1500	28	P1B5
3024	conveyor	21.9452	-100.026	20	1500	31	P1B5
3025	conveyor	21.9503	-100.034	20	1500	25	P1B5
3026	conveyor	21.9515	-100.03	20	1500	24	P1B5
3027	conveyor	21.9521	-100.027	20	1500	29	P1B5
3028	conveyor	21.9598	-100.034	20	1500	0	P1B5
3029	conveyor	21.9584	-100.031	20	1500	22	P1B5
3030	conveyor	21.9576	-100.027	20	1500	0	P1B5
3001	conveyor	21.903	-100.034	21	1000	0	P1B5
3002	conveyor	21.9032	-100.03	21	1000	16	P1B5
3003	conveyor	21.9032	-100.027	21	1000	21	P1B5
3004	conveyor	21.9088	-100.034	21	1000	0	P1B5
3005	conveyor	21.9091	-100.031	21	1000	10	P1B5
3006	conveyor	21.9101	-100.026	21	1000	12	P1B5
3007	conveyor	21.9149	-100.033	21	1000	8	P1B5
3008	conveyor	21.9139	21.9139	21	1000	0	P1B5
3009	conveyor	21.9139	-100.026	21	1000	0	P1B5
3010	conveyor	21.9205	-100.036	21	1000	18	P1B5
3011	conveyor	21.9202	-100.031	21	1000	25	P1B5
3012	conveyor	21.9198	-100.027	21	1000	6	P1B5
3013	conveyor	21.9249	-100.035	21	1000	3	P1B5
3014	conveyor	21.9244	-100.032	21	1000	0	P1B5
3015	conveyor	21.9241	-100.026	21	1000	0	P1B5
3016	conveyor	21.9298	-100.035	21	1000	21	P1B5
3017	conveyor	21.9287	-100.031	21	1000	16	P1B5
3018	conveyor	21.9284	-100.026	21	1000	4	P1B5
3019	conveyor	21.9381	-100.035	21	1000	24	P1B5
3020	conveyor	21.9372	-100.029	21	1000	0	P1B5
3021	conveyor	21.9374	-100.026	21	1000	5	P1B5
3022	conveyor	21.9463	-100.036	21	1000	4	P1B5
3023	conveyor	21.9458	-100.031	21	1000	7	P1B5
3024	conveyor	21.9452	-100.026	21	1000	15	P1B5
3025	conveyor	21.9503	-100.034	21	1000	14	P1B5
3026	conveyor	21.9515	-100.03	21	1000	12	P1B5
3027	conveyor	21.9521	-100.027	21	1000	0	P1B5
3028	conveyor	21.9598	-100.034	21	1000	21	P1B5
3029	conveyor	21.9584	-100.031	21	1000	25	P1B5
3030	conveyor	21.9576	-100.027	21	1000	18	P1B5
3001	conveyor	21.903	-100.034	22	1000	10	P1B5
3002	conveyor	21.9032	-100.03	22	1000	15	P1B5
3003	conveyor	21.9032	-100.027	22	1000	12	P1B5
3004	conveyor	21.9088	-100.034	22	1000	8	P1B5
3005	conveyor	21.9091	-100.031	22	1000	0	P1B5
3006	conveyor	21.9101	-100.026	22	1000	14	P1B5
3007	conveyor	21.9149	-100.033	22	1000	9	P1B5
3008	conveyor	21.9139	21.9139	22	1000	14	P1B5
3009	conveyor	21.9139	-100.026	22	1000	9	P1B5
3010	conveyor	21.9205	-100.036	22	1000	0	P1B5
3011	conveyor	21.9202	-100.031	22	1000	18	P1B5
3012	conveyor	21.9198	-100.027	22	1000	0	P1B5
3013	conveyor	21.9249	-100.035	22	1000	14	P1B5
3014	conveyor	21.9244	-100.032	22	1000	9	P1B5
3015	conveyor	21.9241	-100.026	22	1000	11	P1B5
3016	conveyor	21.9298	-100.035	22	1000	16	P1B5
3017	conveyor	21.9287	-100.031	22	1000	17	P1B5
3018	conveyor	21.9284	-100.026	22	1000	0	P1B5
3019	conveyor	21.9381	-100.035	22	1000	6	P1B5
3020	conveyor	21.9372	-100.029	22	1000	24	P1B5
3021	conveyor	21.9374	-100.026	22	1000	18	P1B5
3022	conveyor	21.9463	-100.036	22	1000	22	P1B5
3023	conveyor	21.9458	-100.031	22	1000	0	P1B5
3024	conveyor	21.9452	-100.026	22	1000	14	P1B5
3025	conveyor	21.9503	-100.034	22	1000	2	P1B5
3026	conveyor	21.9515	-100.03	22	1000	9	P1B5
3027	conveyor	21.9521	-100.027	22	1000	7	P1B5
3028	conveyor	21.9598	-100.034	22	1000	6	P1B5
3029	conveyor	21.9584	-100.031	22	1000	8	P1B5
3030	conveyor	21.9576	-100.027	22	1000	7	P1B5
3001	conveyor	21.903	-100.034	23	1000	11	P1B5
3002	conveyor	21.9032	-100.03	23	1000	28	P1B5
3003	conveyor	21.9032	-100.027	23	1000	0	P1B5
3004	conveyor	21.9088	-100.034	23	1000	34	P1B5
3005	conveyor	21.9091	-100.031	23	1000	35	P1B5
3006	conveyor	21.9101	-100.026	23	1000	45	P1B5
3007	conveyor	21.9149	-100.033	23	1000	8	P1B5
3008	conveyor	21.9139	21.9139	23	1000	16	P1B5
3009	conveyor	21.9139	-100.026	23	1000	64	P1B5
3010	conveyor	21.9205	-100.036	23	1000	25	P1B5
3011	conveyor	21.9202	-100.031	23	1000	37	P1B5
3012	conveyor	21.9198	-100.027	23	1000	12	P1B5
3013	conveyor	21.9249	-100.035	23	1000	1	P1B5
3014	conveyor	21.9244	-100.032	23	1000	18	P1B5
3015	conveyor	21.9241	-100.026	23	1000	42	P1B5
3016	conveyor	21.9298	-100.035	23	1000	38	P1B5
3017	conveyor	21.9287	-100.031	23	1000	2	P1B5
3018	conveyor	21.9284	-100.026	23	1000	61	P1B5
3019	conveyor	21.9381	-100.035	23	1000	12	P1B5
3020	conveyor	21.9372	-100.029	23	1000	7	P1B5
3021	conveyor	21.9374	-100.026	23	1000	51	P1B5
3022	conveyor	21.9463	-100.036	23	1000	39	P1B5
3023	conveyor	21.9458	-100.031	23	1000	25	P1B5
3024	conveyor	21.9452	-100.026	23	1000	49	P1B5
3025	conveyor	21.9503	-100.034	23	1000	44	P1B5
3026	conveyor	21.9515	-100.03	23	1000	6	P1B5
3027	conveyor	21.9521	-100.027	23	1000	2	P1B5
3028	conveyor	21.9598	-100.034	23	1000	16	P1B5
3029	conveyor	21.9584	-100.031	23	1000	45	P1B5
3030	conveyor	21.9576	-100.027	23	1000	1	P1B5
3001	conveyor	21.903	-100.034	24	1000	2	P1B5
3002	conveyor	21.9032	-100.03	24	1000	45	P1B5
3003	conveyor	21.9032	-100.027	24	1000	25	P1B5
3004	conveyor	21.9088	-100.034	24	1000	14	P1B5
3005	conveyor	21.9091	-100.031	24	1000	6	P1B5
3006	conveyor	21.9101	-100.026	24	1000	36	P1B5
3007	conveyor	21.9149	-100.033	24	1000	0	P1B5
3008	conveyor	21.9139	21.9139	24	1000	64	P1B5
3009	conveyor	21.9139	-100.026	24	1000	57	P1B5
3010	conveyor	21.9205	-100.036	24	1000	71	P1B5
3011	conveyor	21.9202	-100.031	24	1000	12	P1B5
3012	conveyor	21.9198	-100.027	24	1000	6	P1B5
3013	conveyor	21.9249	-100.035	24	1000	1	P1B5
3014	conveyor	21.9244	-100.032	24	1000	35	P1B5
3015	conveyor	21.9241	-100.026	24	1000	0	P1B5
3016	conveyor	21.9298	-100.035	24	1000	48	P1B5
3017	conveyor	21.9287	-100.031	24	1000	0	P1B5
3018	conveyor	21.9284	-100.026	24	1000	52	P1B5
3019	conveyor	21.9381	-100.035	24	1000	6	P1B5
3020	conveyor	21.9372	-100.029	24	1000	12	P1B5
3021	conveyor	21.9374	-100.026	24	1000	1	P1B5
3022	conveyor	21.9463	-100.036	24	1000	52	P1B5
3023	conveyor	21.9458	-100.031	24	1000	3	P1B5
3024	conveyor	21.9452	-100.026	24	1000	45	P1B5
3025	conveyor	21.9503	-100.034	24	1000	64	P1B5
3026	conveyor	21.9515	-100.03	24	1000	84	P1B5
3027	conveyor	21.9521	-100.027	24	1000	27	P1B5
3028	conveyor	21.9598	-100.034	24	1000	45	P1B5
3029	conveyor	21.9584	-100.031	24	1000	1	P1B5
3030	conveyor	21.9576	-100.027	24	1000	26	P1B5
3001	conveyor	21.903	-100.034	25	1000	45	P1B5
3002	conveyor	21.9032	-100.03	25	1000	38	P1B5
3003	conveyor	21.9032	-100.027	25	1000	2	P1B5
3004	conveyor	21.9088	-100.034	25	1000	47	P1B5
3005	conveyor	21.9091	-100.031	25	1000	62	P1B5
3006	conveyor	21.9101	-100.026	25	1000	12	P1B5
3007	conveyor	21.9149	-100.033	25	1000	6	P1B5
3008	conveyor	21.9139	21.9139	25	1000	47	P1B5
3009	conveyor	21.9139	-100.026	25	1000	51	P1B5
3010	conveyor	21.9205	-100.036	25	1000	1	P1B5
3011	conveyor	21.9202	-100.031	25	1000	2	P1B5
3012	conveyor	21.9198	-100.027	25	1000	61	P1B5
3013	conveyor	21.9249	-100.035	25	1000	1	P1B5
3014	conveyor	21.9244	-100.032	25	1000	27	P1B5
3015	conveyor	21.9241	-100.026	25	1000	31	P1B5
3016	conveyor	21.9298	-100.035	25	1000	1	P1B5
3017	conveyor	21.9287	-100.031	25	1000	25	P1B5
3018	conveyor	21.9284	-100.026	25	1000	32	P1B5
3019	conveyor	21.9381	-100.035	25	1000	6	P1B5
3020	conveyor	21.9372	-100.029	25	1000	40	P1B5
3021	conveyor	21.9374	-100.026	25	1000	28	P1B5
3022	conveyor	21.9463	-100.036	25	1000	2	P1B5
3023	conveyor	21.9458	-100.031	25	1000	0	P1B5
3024	conveyor	21.9452	-100.026	25	1000	7	P1B5
3025	conveyor	21.9503	-100.034	25	1000	16	P1B5
3026	conveyor	21.9515	-100.03	25	1000	0	P1B5
3027	conveyor	21.9521	-100.027	25	1000	48	P1B5
3028	conveyor	21.9598	-100.034	25	1000	25	P1B5
3029	conveyor	21.9584	-100.031	25	1000	0	P1B5
3030	conveyor	21.9576	-100.027	25	1000	3	P1B5
3001	conveyor	21.903	-100.034	26	1000	2	P1B5
3002	conveyor	21.9032	-100.03	26	1000	34	P1B5
3003	conveyor	21.9032	-100.027	26	1000	25	P1B5
3004	conveyor	21.9088	-100.034	26	1000	74	P1B5
3005	conveyor	21.9091	-100.031	26	1000	2	P1B5
3006	conveyor	21.9101	-100.026	26	1000	16	P1B5
3007	conveyor	21.9149	-100.033	26	1000	28	P1B5
3008	conveyor	21.9139	21.9139	26	1000	13	P1B5
3009	conveyor	21.9139	-100.026	26	1000	16	P1B5
3010	conveyor	21.9205	-100.036	26	1000	4	P1B5
3011	conveyor	21.9202	-100.031	26	1000	18	P1B5
3012	conveyor	21.9198	-100.027	26	1000	0	P1B5
3013	conveyor	21.9249	-100.035	26	1000	33	P1B5
3014	conveyor	21.9244	-100.032	26	1000	35	P1B5
3015	conveyor	21.9241	-100.026	26	1000	0	P1B5
3016	conveyor	21.9298	-100.035	26	1000	45	P1B5
3017	conveyor	21.9287	-100.031	26	1000	61	P1B5
3018	conveyor	21.9284	-100.026	26	1000	0	P1B5
3019	conveyor	21.9381	-100.035	26	1000	0	P1B5
3020	conveyor	21.9372	-100.029	26	1000	71	P1B5
3021	conveyor	21.9374	-100.026	26	1000	60	P1B5
3022	conveyor	21.9463	-100.036	26	1000	0	P1B5
3023	conveyor	21.9458	-100.031	26	1000	51	P1B5
3024	conveyor	21.9452	-100.026	26	1000	28	P1B5
3025	conveyor	21.9503	-100.034	26	1000	31	P1B5
3026	conveyor	21.9515	-100.03	26	1000	13	P1B5
3027	conveyor	21.9521	-100.027	26	1000	21	P1B5
3028	conveyor	21.9598	-100.034	26	1000	24	P1B5
3029	conveyor	21.9584	-100.031	26	1000	19	P1B5
3030	conveyor	21.9576	-100.027	26	1000	18	P1B5
3001	conveyor	21.903	-100.034	27	1000	43	P1B5
3002	conveyor	21.9032	-100.03	27	1000	51	P1B5
3003	conveyor	21.9032	-100.027	27	1000	44	P1B5
3004	conveyor	21.9088	-100.034	27	1000	86	P1B5
3005	conveyor	21.9091	-100.031	27	1000	0	P1B5
3006	conveyor	21.9101	-100.026	27	1000	41	P1B5
3007	conveyor	21.9149	-100.033	27	1000	29	P1B5
3008	conveyor	21.9139	21.9139	27	1000	48	P1B5
3009	conveyor	21.9139	-100.026	27	1000	16	P1B5
3010	conveyor	21.9205	-100.036	27	1000	44	P1B5
3011	conveyor	21.9202	-100.031	27	1000	41	P1B5
3012	conveyor	21.9198	-100.027	27	1000	12	P1B5
3013	conveyor	21.9249	-100.035	27	1000	78	P1B5
3014	conveyor	21.9244	-100.032	27	1000	21	P1B5
3015	conveyor	21.9241	-100.026	27	1000	16	P1B5
3016	conveyor	21.9298	-100.035	27	1000	0	P1B5
3017	conveyor	21.9287	-100.031	27	1000	33	P1B5
3018	conveyor	21.9284	-100.026	27	1000	28	P1B5
3019	conveyor	21.9381	-100.035	27	1000	0	P1B5
3020	conveyor	21.9372	-100.029	27	1000	45	P1B5
3021	conveyor	21.9374	-100.026	27	1000	0	P1B5
3022	conveyor	21.9463	-100.036	27	1000	0	P1B5
3023	conveyor	21.9458	-100.031	27	1000	28	P1B5
3024	conveyor	21.9452	-100.026	27	1000	0	P1B5
3025	conveyor	21.9503	-100.034	27	1000	31	P1B5
3026	conveyor	21.9515	-100.03	27	1000	54	P1B5
3027	conveyor	21.9521	-100.027	27	1000	62	P1B5
3028	conveyor	21.9598	-100.034	27	1000	28	P1B5
3029	conveyor	21.9584	-100.031	27	1000	47	P1B5
3030	conveyor	21.9576	-100.027	27	1000	61	P1B5
3001	conveyor	21.903	-100.034	28	1000	0	P1B5
3002	conveyor	21.9032	-100.03	28	1000	65	P1B5
3003	conveyor	21.9032	-100.027	28	1000	58	P1B5
3004	conveyor	21.9088	-100.034	28	1000	0	P1B5
3005	conveyor	21.9091	-100.031	28	1000	74	P1B5
3006	conveyor	21.9101	-100.026	28	1000	47	P1B5
3007	conveyor	21.9149	-100.033	28	1000	0	P1B5
3008	conveyor	21.9139	21.9139	28	1000	60	P1B5
3009	conveyor	21.9139	-100.026	28	1000	18	P1B5
3010	conveyor	21.9205	-100.036	28	1000	77	P1B5
3011	conveyor	21.9202	-100.031	28	1000	80	P1B5
3012	conveyor	21.9198	-100.027	28	1000	0	P1B5
3013	conveyor	21.9249	-100.035	28	1000	28	P1B5
3014	conveyor	21.9244	-100.032	28	1000	94	P1B5
3015	conveyor	21.9241	-100.026	28	1000	0	P1B5
3016	conveyor	21.9298	-100.035	28	1000	51	P1B5
3017	conveyor	21.9287	-100.031	28	1000	16	P1B5
3018	conveyor	21.9284	-100.026	28	1000	0	P1B5
3019	conveyor	21.9381	-100.035	28	1000	63	P1B5
3020	conveyor	21.9372	-100.029	28	1000	81	P1B5
3021	conveyor	21.9374	-100.026	28	1000	29	P1B5
3022	conveyor	21.9463	-100.036	28	1000	44	P1B5
3023	conveyor	21.9458	-100.031	28	1000	0	P1B5
3024	conveyor	21.9452	-100.026	28	1000	63	P1B5
3025	conveyor	21.9503	-100.034	28	1000	74	P1B5
3026	conveyor	21.9515	-100.03	28	1000	0	P1B5
3027	conveyor	21.9521	-100.027	28	1000	0	P1B5
3028	conveyor	21.9598	-100.034	28	1000	12	P1B5
3029	conveyor	21.9584	-100.031	28	1000	20	P1B5
3030	conveyor	21.9576	-100.027	28	1000	0	P1B5
3001	conveyor	21.903	-100.034	29	1000	51	P1B5
3002	conveyor	21.9032	-100.03	29	1000	46	P1B5
3003	conveyor	21.9032	-100.027	29	1000	0	P1B5
3004	conveyor	21.9088	-100.034	29	1000	32	P1B5
3005	conveyor	21.9091	-100.031	29	1000	16	P1B5
3006	conveyor	21.9101	-100.026	29	1000	0	P1B5
3007	conveyor	21.9149	-100.033	29	1000	78	P1B5
3008	conveyor	21.9139	21.9139	29	1000	25	P1B5
3009	conveyor	21.9139	-100.026	29	1000	0	P1B5
3010	conveyor	21.9205	-100.036	29	1000	44	P1B5
3011	conveyor	21.9202	-100.031	29	1000	36	P1B5
3012	conveyor	21.9198	-100.027	29	1000	7	P1B5
3013	conveyor	21.9249	-100.035	29	1000	38	P1B5
3014	conveyor	21.9244	-100.032	29	1000	44	P1B5
3015	conveyor	21.9241	-100.026	29	1000	0	P1B5
3016	conveyor	21.9298	-100.035	29	1000	0	P1B5
3017	conveyor	21.9287	-100.031	29	1000	12	P1B5
3018	conveyor	21.9284	-100.026	29	1000	54	P1B5
3019	conveyor	21.9381	-100.035	29	1000	35	P1B5
3020	conveyor	21.9372	-100.029	29	1000	0	P1B5
3021	conveyor	21.9374	-100.026	29	1000	36	P1B5
3022	conveyor	21.9463	-100.036	29	1000	21	P1B5
3023	conveyor	21.9458	-100.031	29	1000	0	P1B5
3024	conveyor	21.9452	-100.026	29	1000	27	P1B5
3025	conveyor	21.9503	-100.034	29	1000	32	P1B5
3026	conveyor	21.9515	-100.03	29	1000	0	P1B5
3027	conveyor	21.9521	-100.027	29	1000	34	P1B5
3028	conveyor	21.9598	-100.034	29	1000	16	P1B5
3029	conveyor	21.9584	-100.031	29	1000	8	P1B5
3030	conveyor	21.9576	-100.027	29	1000	12	P1B5
3001	conveyor	21.903	-100.034	30	1000	0	P1B5
3002	conveyor	21.9032	-100.03	30	1000	68	P1B5
3003	conveyor	21.9032	-100.027	30	1000	74	P1B5
3004	conveyor	21.9088	-100.034	30	1000	0	P1B5
3005	conveyor	21.9091	-100.031	30	1000	25	P1B5
3006	conveyor	21.9101	-100.026	30	1000	1	P1B5
3007	conveyor	21.9149	-100.033	30	1000	0	P1B5
3008	conveyor	21.9139	21.9139	30	1000	47	P1B5
3009	conveyor	21.9139	-100.026	30	1000	59	P1B5
3010	conveyor	21.9205	-100.036	30	1000	61	P1B5
3011	conveyor	21.9202	-100.031	30	1000	36	P1B5
3012	conveyor	21.9198	-100.027	30	1000	0	P1B5
3013	conveyor	21.9249	-100.035	30	1000	28	P1B5
3014	conveyor	21.9244	-100.032	30	1000	45	P1B5
3015	conveyor	21.9241	-100.026	30	1000	69	P1B5
3016	conveyor	21.9298	-100.035	30	1000	71	P1B5
3017	conveyor	21.9287	-100.031	30	1000	0	P1B5
3018	conveyor	21.9284	-100.026	30	1000	52	P1B5
3019	conveyor	21.9381	-100.035	30	1000	77	P1B5
3020	conveyor	21.9372	-100.029	30	1000	0	P1B5
3021	conveyor	21.9374	-100.026	30	1000	0	P1B5
3022	conveyor	21.9463	-100.036	30	1000	70	P1B5
3023	conveyor	21.9458	-100.031	30	1000	0	P1B5
3024	conveyor	21.9452	-100.026	30	1000	66	P1B5
3025	conveyor	21.9503	-100.034	30	1000	15	P1B5
3026	conveyor	21.9515	-100.03	30	1000	18	P1B5
3027	conveyor	21.9521	-100.027	30	1000	0	P1B5
3028	conveyor	21.9598	-100.034	30	1000	31	P1B5
3029	conveyor	21.9584	-100.031	30	1000	33	P1B5
3030	conveyor	21.9576	-100.027	30	1000	41	P1B5
3001	conveyor	21.903	-100.034	31	500	2	P1B5
3002	conveyor	21.9032	-100.03	31	500	0	P1B5
3003	conveyor	21.9032	-100.027	31	500	0	P1B5
3004	conveyor	21.9088	-100.034	31	500	125	P1B5
3005	conveyor	21.9091	-100.031	31	500	8	P1B5
3006	conveyor	21.9101	-100.026	31	500	0	P1B5
3007	conveyor	21.9149	-100.033	31	500	0	P1B5
3008	conveyor	21.9139	21.9139	31	500	0	P1B5
3009	conveyor	21.9139	-100.026	31	500	101	P1B5
3010	conveyor	21.9205	-100.036	31	500	7	P1B5
3011	conveyor	21.9202	-100.031	31	500	0	P1B5
3012	conveyor	21.9198	-100.027	31	500	0	P1B5
3013	conveyor	21.9249	-100.035	31	500	219	P1B5
3014	conveyor	21.9244	-100.032	31	500	5	P1B5
3015	conveyor	21.9241	-100.026	31	500	66	P1B5
3016	conveyor	21.9298	-100.035	31	500	0	P1B5
3017	conveyor	21.9287	-100.031	31	500	128	P1B5
3018	conveyor	21.9284	-100.026	31	500	18	P1B5
3019	conveyor	21.9381	-100.035	31	500	0	P1B5
3020	conveyor	21.9372	-100.029	31	500	52	P1B5
3021	conveyor	21.9374	-100.026	31	500	7	P1B5
3022	conveyor	21.9463	-100.036	31	500	0	P1B5
3023	conveyor	21.9458	-100.031	31	500	1	P1B5
3024	conveyor	21.9452	-100.026	31	500	47	P1B5
3025	conveyor	21.9503	-100.034	31	500	0	P1B5
3026	conveyor	21.9515	-100.03	31	500	0	P1B5
3027	conveyor	21.9521	-100.027	31	500	0	P1B5
3028	conveyor	21.9598	-100.034	31	500	7	P1B5
3029	conveyor	21.9584	-100.031	31	500	35	P1B5
3030	conveyor	21.9576	-100.027	31	500	24	P1B5
3001	conveyor	21.903	-100.034	32	500	12	P1B5
3002	conveyor	21.9032	-100.03	32	500	4	P1B5
3003	conveyor	21.9032	-100.027	32	500	6	P1B5
3004	conveyor	21.9088	-100.034	32	500	0	P1B5
3005	conveyor	21.9091	-100.031	32	500	0	P1B5
3006	conveyor	21.9101	-100.026	32	500	0	P1B5
3007	conveyor	21.9149	-100.033	32	500	0	P1B5
3008	conveyor	21.9139	21.9139	32	500	1	P1B5
3009	conveyor	21.9139	-100.026	32	500	0	P1B5
3010	conveyor	21.9205	-100.036	32	500	117	P1B5
3011	conveyor	21.9202	-100.031	32	500	78	P1B5
3012	conveyor	21.9198	-100.027	32	500	0	P1B5
3013	conveyor	21.9249	-100.035	32	500	14	P1B5
3014	conveyor	21.9244	-100.032	32	500	28	P1B5
3015	conveyor	21.9241	-100.026	32	500	0	P1B5
3016	conveyor	21.9298	-100.035	32	500	78	P1B5
3017	conveyor	21.9287	-100.031	32	500	16	P1B5
3018	conveyor	21.9284	-100.026	32	500	0	P1B5
3019	conveyor	21.9381	-100.035	32	500	108	P1B5
3020	conveyor	21.9372	-100.029	32	500	81	P1B5
3021	conveyor	21.9374	-100.026	32	500	0	P1B5
3022	conveyor	21.9463	-100.036	32	500	0	P1B5
3023	conveyor	21.9458	-100.031	32	500	12	P1B5
3024	conveyor	21.9452	-100.026	32	500	15	P1B5
3025	conveyor	21.9503	-100.034	32	500	14	P1B5
3026	conveyor	21.9515	-100.03	32	500	15	P1B5
3027	conveyor	21.9521	-100.027	32	500	9	P1B5
3028	conveyor	21.9598	-100.034	32	500	17	P1B5
3029	conveyor	21.9584	-100.031	32	500	98	P1B5
3030	conveyor	21.9576	-100.027	32	500	2	P1B5
3001	conveyor	21.903	-100.034	33	500	0	P1B5
3002	conveyor	21.9032	-100.03	33	500	127	P1B5
3003	conveyor	21.9032	-100.027	33	500	41	P1B5
3004	conveyor	21.9088	-100.034	33	500	0	P1B5
3005	conveyor	21.9091	-100.031	33	500	12	P1B5
3006	conveyor	21.9101	-100.026	33	500	108	P1B5
3007	conveyor	21.9149	-100.033	33	500	0	P1B5
3008	conveyor	21.9139	21.9139	33	500	154	P1B5
3009	conveyor	21.9139	-100.026	33	500	12	P1B5
3010	conveyor	21.9205	-100.036	33	500	0	P1B5
3011	conveyor	21.9202	-100.031	33	500	126	P1B5
3012	conveyor	21.9198	-100.027	33	500	97	P1B5
3013	conveyor	21.9249	-100.035	33	500	63	P1B5
3014	conveyor	21.9244	-100.032	33	500	0	P1B5
3015	conveyor	21.9241	-100.026	33	500	21	P1B5
3016	conveyor	21.9298	-100.035	33	500	12	P1B5
3017	conveyor	21.9287	-100.031	33	500	0	P1B5
3018	conveyor	21.9284	-100.026	33	500	0	P1B5
3019	conveyor	21.9381	-100.035	33	500	54	P1B5
3020	conveyor	21.9372	-100.029	33	500	0	P1B5
3021	conveyor	21.9374	-100.026	33	500	0	P1B5
3022	conveyor	21.9463	-100.036	33	500	95	P1B5
3023	conveyor	21.9458	-100.031	33	500	0	P1B5
3024	conveyor	21.9452	-100.026	33	500	44	P1B5
3025	conveyor	21.9503	-100.034	33	500	0	P1B5
3026	conveyor	21.9515	-100.03	33	500	0	P1B5
3027	conveyor	21.9521	-100.027	33	500	1	P1B5
3028	conveyor	21.9598	-100.034	33	500	0	P1B5
3029	conveyor	21.9584	-100.031	33	500	0	P1B5
3030	conveyor	21.9576	-100.027	33	500	57	P1B5
3001	conveyor	21.903	-100.034	34	500	0	P1B5
3002	conveyor	21.9032	-100.03	34	500	2	P1B5
3003	conveyor	21.9032	-100.027	34	500	0	P1B5
3004	conveyor	21.9088	-100.034	34	500	19	P1B5
3005	conveyor	21.9091	-100.031	34	500	124	P1B5
3006	conveyor	21.9101	-100.026	34	500	33	P1B5
3007	conveyor	21.9149	-100.033	34	500	0	P1B5
3008	conveyor	21.9139	21.9139	34	500	0	P1B5
3009	conveyor	21.9139	-100.026	34	500	128	P1B5
3010	conveyor	21.9205	-100.036	34	500	12	P1B5
3011	conveyor	21.9202	-100.031	34	500	44	P1B5
3012	conveyor	21.9198	-100.027	34	500	0	P1B5
3013	conveyor	21.9249	-100.035	34	500	66	P1B5
3014	conveyor	21.9244	-100.032	34	500	0	P1B5
3015	conveyor	21.9241	-100.026	34	500	0	P1B5
3016	conveyor	21.9298	-100.035	34	500	107	P1B5
3017	conveyor	21.9287	-100.031	34	500	0	P1B5
3018	conveyor	21.9284	-100.026	34	500	6	P1B5
3019	conveyor	21.9381	-100.035	34	500	0	P1B5
3020	conveyor	21.9372	-100.029	34	500	0	P1B5
3021	conveyor	21.9374	-100.026	34	500	5	P1B5
3022	conveyor	21.9463	-100.036	34	500	148	P1B5
3023	conveyor	21.9458	-100.031	34	500	102	P1B5
3024	conveyor	21.9452	-100.026	34	500	0	P1B5
3025	conveyor	21.9503	-100.034	34	500	0	P1B5
3026	conveyor	21.9515	-100.03	34	500	44	P1B5
3027	conveyor	21.9521	-100.027	34	500	121	P1B5
3028	conveyor	21.9598	-100.034	34	500	87	P1B5
3029	conveyor	21.9584	-100.031	34	500	6	P1B5
3030	conveyor	21.9576	-100.027	34	500	147	P1B5
3001	conveyor	21.903	-100.034	35	500	49	P1B5
3002	conveyor	21.9032	-100.03	35	500	0	P1B5
3003	conveyor	21.9032	-100.027	35	500	0	P1B5
3004	conveyor	21.9088	-100.034	35	500	172	P1B5
3005	conveyor	21.9091	-100.031	35	500	0	P1B5
3006	conveyor	21.9101	-100.026	35	500	0	P1B5
3007	conveyor	21.9149	-100.033	35	500	0	P1B5
3008	conveyor	21.9139	21.9139	35	500	188	P1B5
3009	conveyor	21.9139	-100.026	35	500	20	P1B5
3010	conveyor	21.9205	-100.036	35	500	0	P1B5
3011	conveyor	21.9202	-100.031	35	500	0	P1B5
3012	conveyor	21.9198	-100.027	35	500	0	P1B5
3013	conveyor	21.9249	-100.035	35	500	150	P1B5
3014	conveyor	21.9244	-100.032	35	500	45	P1B5
3015	conveyor	21.9241	-100.026	35	500	0	P1B5
3016	conveyor	21.9298	-100.035	35	500	0	P1B5
3017	conveyor	21.9287	-100.031	35	500	23	P1B5
3018	conveyor	21.9284	-100.026	35	500	0	P1B5
3019	conveyor	21.9381	-100.035	35	500	12	P1B5
3020	conveyor	21.9372	-100.029	35	500	7	P1B5
3021	conveyor	21.9374	-100.026	35	500	0	P1B5
3022	conveyor	21.9463	-100.036	35	500	0	P1B5
3023	conveyor	21.9458	-100.031	35	500	25	P1B5
3024	conveyor	21.9452	-100.026	35	500	0	P1B5
3025	conveyor	21.9503	-100.034	35	500	74	P1B5
3026	conveyor	21.9515	-100.03	35	500	0	P1B5
3027	conveyor	21.9521	-100.027	35	500	0	P1B5
3028	conveyor	21.9598	-100.034	35	500	0	P1B5
3029	conveyor	21.9584	-100.031	35	500	36	P1B5
3030	conveyor	21.9576	-100.027	35	500	0	P1B5
3001	conveyor	21.903	-100.034	36	500	12	P1B5
3002	conveyor	21.9032	-100.03	36	500	0	P1B5
3003	conveyor	21.9032	-100.027	36	500	87	P1B5
3004	conveyor	21.9088	-100.034	36	500	6	P1B5
3005	conveyor	21.9091	-100.031	36	500	9	P1B5
3006	conveyor	21.9101	-100.026	36	500	0	P1B5
3007	conveyor	21.9149	-100.033	36	500	54	P1B5
3008	conveyor	21.9139	21.9139	36	500	1	P1B5
3009	conveyor	21.9139	-100.026	36	500	0	P1B5
3010	conveyor	21.9205	-100.036	36	500	7	P1B5
3011	conveyor	21.9202	-100.031	36	500	62	P1B5
3012	conveyor	21.9198	-100.027	36	500	0	P1B5
3013	conveyor	21.9249	-100.035	36	500	26	P1B5
3014	conveyor	21.9244	-100.032	36	500	14	P1B5
3015	conveyor	21.9241	-100.026	36	500	0	P1B5
3016	conveyor	21.9298	-100.035	36	500	34	P1B5
3017	conveyor	21.9287	-100.031	36	500	21	P1B5
3018	conveyor	21.9284	-100.026	36	500	16	P1B5
3019	conveyor	21.9381	-100.035	36	500	0	P1B5
3020	conveyor	21.9372	-100.029	36	500	17	P1B5
3021	conveyor	21.9374	-100.026	36	500	3	P1B5
3022	conveyor	21.9463	-100.036	36	500	0	P1B5
3023	conveyor	21.9458	-100.031	36	500	9	P1B5
3024	conveyor	21.9452	-100.026	36	500	47	P1B5
3025	conveyor	21.9503	-100.034	36	500	0	P1B5
3026	conveyor	21.9515	-100.03	36	500	24	P1B5
3027	conveyor	21.9521	-100.027	36	500	0	P1B5
3028	conveyor	21.9598	-100.034	36	500	9	P1B5
3029	conveyor	21.9584	-100.031	36	500	0	P1B5
3030	conveyor	21.9576	-100.027	36	500	7	P1B5
3001	conveyor	21.903	-100.034	37	500	6	P1B5
3002	conveyor	21.9032	-100.03	37	500	44	P1B5
3003	conveyor	21.9032	-100.027	37	500	0	P1B5
3004	conveyor	21.9088	-100.034	37	500	0	P1B5
3005	conveyor	21.9091	-100.031	37	500	31	P1B5
3006	conveyor	21.9101	-100.026	37	500	0	P1B5
3007	conveyor	21.9149	-100.033	37	500	0	P1B5
3008	conveyor	21.9139	21.9139	37	500	86	P1B5
3009	conveyor	21.9139	-100.026	37	500	6	P1B5
3010	conveyor	21.9205	-100.036	37	500	0	P1B5
3011	conveyor	21.9202	-100.031	37	500	0	P1B5
3012	conveyor	21.9198	-100.027	37	500	22	P1B5
3013	conveyor	21.9249	-100.035	37	500	47	P1B5
3014	conveyor	21.9244	-100.032	37	500	1	P1B5
3015	conveyor	21.9241	-100.026	37	500	25	P1B5
3016	conveyor	21.9298	-100.035	37	500	0	P1B5
3017	conveyor	21.9287	-100.031	37	500	0	P1B5
3018	conveyor	21.9284	-100.026	37	500	33	P1B5
3019	conveyor	21.9381	-100.035	37	500	103	P1B5
3020	conveyor	21.9372	-100.029	37	500	0	P1B5
3021	conveyor	21.9374	-100.026	37	500	69	P1B5
3022	conveyor	21.9463	-100.036	37	500	0	P1B5
3023	conveyor	21.9458	-100.031	37	500	0	P1B5
3024	conveyor	21.9452	-100.026	37	500	6	P1B5
3025	conveyor	21.9503	-100.034	37	500	0	P1B5
3026	conveyor	21.9515	-100.03	37	500	9	P1B5
3027	conveyor	21.9521	-100.027	37	500	44	P1B5
3028	conveyor	21.9598	-100.034	37	500	78	P1B5
3029	conveyor	21.9584	-100.031	37	500	10	P1B5
3030	conveyor	21.9576	-100.027	37	500	21	P1B5
3001	conveyor	21.903	-100.034	38	500	0	P1B5
3002	conveyor	21.9032	-100.03	38	500	0	P1B5
3003	conveyor	21.9032	-100.027	38	500	2	P1B5
3004	conveyor	21.9088	-100.034	38	500	41	P1B5
3005	conveyor	21.9091	-100.031	38	500	0	P1B5
3006	conveyor	21.9101	-100.026	38	500	0	P1B5
3007	conveyor	21.9149	-100.033	38	500	6	P1B5
3008	conveyor	21.9139	21.9139	38	500	18	P1B5
3009	conveyor	21.9139	-100.026	38	500	38	P1B5
3010	conveyor	21.9205	-100.036	38	500	0	P1B5
3011	conveyor	21.9202	-100.031	38	500	29	P1B5
3012	conveyor	21.9198	-100.027	38	500	8	P1B5
3013	conveyor	21.9249	-100.035	38	500	6	P1B5
3014	conveyor	21.9244	-100.032	38	500	28	P1B5
3015	conveyor	21.9241	-100.026	38	500	0	P1B5
3016	conveyor	21.9298	-100.035	38	500	33	P1B5
3017	conveyor	21.9287	-100.031	38	500	0	P1B5
3018	conveyor	21.9284	-100.026	38	500	0	P1B5
3019	conveyor	21.9381	-100.035	38	500	4	P1B5
3020	conveyor	21.9372	-100.029	38	500	0	P1B5
3021	conveyor	21.9374	-100.026	38	500	0	P1B5
3022	conveyor	21.9463	-100.036	38	500	60	P1B5
3023	conveyor	21.9458	-100.031	38	500	36	P1B5
3024	conveyor	21.9452	-100.026	38	500	0	P1B5
3025	conveyor	21.9503	-100.034	38	500	2	P1B5
3026	conveyor	21.9515	-100.03	38	500	0	P1B5
3027	conveyor	21.9521	-100.027	38	500	0	P1B5
3028	conveyor	21.9598	-100.034	38	500	0	P1B5
3029	conveyor	21.9584	-100.031	38	500	9	P1B5
3030	conveyor	21.9576	-100.027	38	500	12	P1B5
3001	conveyor	21.903	-100.034	39	500	21	P1B5
3002	conveyor	21.9032	-100.03	39	500	0	P1B5
3003	conveyor	21.9032	-100.027	39	500	0	P1B5
3004	conveyor	21.9088	-100.034	39	500	2	P1B5
3005	conveyor	21.9091	-100.031	39	500	18	P1B5
3006	conveyor	21.9101	-100.026	39	500	0	P1B5
3007	conveyor	21.9149	-100.033	39	500	2	P1B5
3008	conveyor	21.9139	21.9139	39	500	1	P1B5
3009	conveyor	21.9139	-100.026	39	500	66	P1B5
3010	conveyor	21.9205	-100.036	39	500	4	P1B5
3011	conveyor	21.9202	-100.031	39	500	14	P1B5
3012	conveyor	21.9198	-100.027	39	500	0	P1B5
3013	conveyor	21.9249	-100.035	39	500	19	P1B5
3014	conveyor	21.9244	-100.032	39	500	0	P1B5
3015	conveyor	21.9241	-100.026	39	500	3	P1B5
3016	conveyor	21.9298	-100.035	39	500	44	P1B5
3017	conveyor	21.9287	-100.031	39	500	6	P1B5
3018	conveyor	21.9284	-100.026	39	500	5	P1B5
3019	conveyor	21.9381	-100.035	39	500	0	P1B5
3020	conveyor	21.9372	-100.029	39	500	40	P1B5
3021	conveyor	21.9374	-100.026	39	500	1	P1B5
3022	conveyor	21.9463	-100.036	39	500	2	P1B5
3023	conveyor	21.9458	-100.031	39	500	0	P1B5
3024	conveyor	21.9452	-100.026	39	500	0	P1B5
3025	conveyor	21.9503	-100.034	39	500	9	P1B5
3026	conveyor	21.9515	-100.03	39	500	17	P1B5
3027	conveyor	21.9521	-100.027	39	500	2	P1B5
3028	conveyor	21.9598	-100.034	39	500	14	P1B5
3029	conveyor	21.9584	-100.031	39	500	6	P1B5
3030	conveyor	21.9576	-100.027	39	500	2	P1B5
2001	smart	21.9249	-100.102	1	2000	21	Rv 2
2002	smart	21.9245	-100.099	1	2000	31	Rv 2
2003	smart	21.9247	-100.096	1	2000	17	Rv 2
2004	smart	21.9256	-100.093	1	2000	24	Rv 2
2005	smart	21.93	-100.103	1	2000	22	Rv 2
2006	smart	21.9304	-100.1	1	2000	17	Rv 2
2007	smart	21.9292	-100.097	1	2000	15	Rv 2
2008	smart	21.9304	-100.094	1	2000	22	Rv 2
2009	smart	21.9354	-100.102	1	2000	21	Rv 2
2010	smart	21.9366	-100.098	1	2000	17	Rv 2
2011	smart	21.9357	-100.094	1	2000	23	Rv 2
2012	smart	21.9385	-100.092	1	2000	25	Rv 2
2013	smart	21.9427	-100.104	1	2000	16	Rv 2
2014	smart	21.9418	-100.1	1	2000	15	Rv 2
2015	smart	21.9413	-100.095	1	2000	15	Rv 2
2016	smart	21.9416	-100.091	1	2000	25	Rv 2
2017	smart	21.9477	-100.103	1	2000	24	Rv 2
2018	smart	21.9467	-100.099	1	2000	25	Rv 2
2019	smart	21.9461	-100.095	1	2000	12	Rv 2
2020	smart	21.9455	-100.092	1	2000	0	Rv 2
2021	smart	21.9528	-100.105	1	2000	28	Rv 2
2022	smart	21.9546	-100.101	1	2000	12	Rv 2
2023	smart	21.9515	-100.098	1	2000	29	Rv 2
2024	smart	21.9529	-100.092	1	2000	19	Rv 2
2001	smart	21.9249	-100.102	2	2000	3	Rv 2
2002	smart	21.9245	-100.099	2	2000	3	Rv 2
2003	smart	21.9247	-100.096	2	2000	4	Rv 2
2004	smart	21.9256	-100.093	2	2000	4	Rv 2
2005	smart	21.93	-100.103	2	2000	0	Rv 2
2006	smart	21.9304	-100.1	2	2000	2	Rv 2
2007	smart	21.9292	-100.097	2	2000	3	Rv 2
2008	smart	21.9304	-100.094	2	2000	4	Rv 2
2009	smart	21.9354	-100.102	2	2000	5	Rv 2
2010	smart	21.9366	-100.098	2	2000	2	Rv 2
2011	smart	21.9357	-100.094	2	2000	0	Rv 2
2012	smart	21.9385	-100.092	2	2000	5	Rv 2
2013	smart	21.9427	-100.104	2	2000	2	Rv 2
2014	smart	21.9418	-100.1	2	2000	5	Rv 2
2015	smart	21.9413	-100.095	2	2000	4	Rv 2
2016	smart	21.9416	-100.091	2	2000	3	Rv 2
2017	smart	21.9477	-100.103	2	2000	5	Rv 2
2018	smart	21.9467	-100.099	2	2000	7	Rv 2
2019	smart	21.9461	-100.095	2	2000	6	Rv 2
2020	smart	21.9455	-100.092	2	2000	3	Rv 2
2021	smart	21.9528	-100.105	2	2000	3	Rv 2
2022	smart	21.9546	-100.101	2	2000	4	Rv 2
2023	smart	21.9515	-100.098	2	2000	0	Rv 2
2024	smart	21.9529	-100.092	2	2000	5	Rv 2
2001	smart	21.9249	-100.102	3	2000	7	Rv 2
2002	smart	21.9245	-100.099	3	2000	5	Rv 2
2003	smart	21.9247	-100.096	3	2000	8	Rv 2
2004	smart	21.9256	-100.093	3	2000	6	Rv 2
2005	smart	21.93	-100.103	3	2000	4	Rv 2
2006	smart	21.9304	-100.1	3	2000	5	Rv 2
2007	smart	21.9292	-100.097	3	2000	8	Rv 2
2008	smart	21.9304	-100.094	3	2000	7	Rv 2
2009	smart	21.9354	-100.102	3	2000	5	Rv 2
2010	smart	21.9366	-100.098	3	2000	6	Rv 2
2011	smart	21.9357	-100.094	3	2000	8	Rv 2
2012	smart	21.9385	-100.092	3	2000	2	Rv 2
2013	smart	21.9427	-100.104	3	2000	3	Rv 2
2014	smart	21.9418	-100.1	3	2000	4	Rv 2
2015	smart	21.9413	-100.095	3	2000	12	Rv 2
2016	smart	21.9416	-100.091	3	2000	2	Rv 2
2017	smart	21.9477	-100.103	3	2000	4	Rv 2
2018	smart	21.9467	-100.099	3	2000	5	Rv 2
2019	smart	21.9461	-100.095	3	2000	6	Rv 2
2020	smart	21.9455	-100.092	3	2000	4	Rv 2
2021	smart	21.9528	-100.105	3	2000	7	Rv 2
2022	smart	21.9546	-100.101	3	2000	3	Rv 2
2023	smart	21.9515	-100.098	3	2000	15	Rv 2
2024	smart	21.9529	-100.092	3	2000	8	Rv 2
2001	smart	21.9249	-100.102	4	2000	8	Rv 2
2002	smart	21.9245	-100.099	4	2000	5	Rv 2
2003	smart	21.9247	-100.096	4	2000	4	Rv 2
2004	smart	21.9256	-100.093	4	2000	6	Rv 2
2005	smart	21.93	-100.103	4	2000	2	Rv 2
2006	smart	21.9304	-100.1	4	2000	3	Rv 2
2007	smart	21.9292	-100.097	4	2000	7	Rv 2
2008	smart	21.9304	-100.094	4	2000	2	Rv 2
2009	smart	21.9354	-100.102	4	2000	3	Rv 2
2010	smart	21.9366	-100.098	4	2000	9	Rv 2
2011	smart	21.9357	-100.094	4	2000	5	Rv 2
2012	smart	21.9385	-100.092	4	2000	4	Rv 2
2013	smart	21.9427	-100.104	4	2000	2	Rv 2
2014	smart	21.9418	-100.1	4	2000	3	Rv 2
2015	smart	21.9413	-100.095	4	2000	5	Rv 2
2016	smart	21.9416	-100.091	4	2000	4	Rv 2
2017	smart	21.9477	-100.103	4	2000	6	Rv 2
2018	smart	21.9467	-100.099	4	2000	4	Rv 2
2019	smart	21.9461	-100.095	4	2000	7	Rv 2
2020	smart	21.9455	-100.092	4	2000	3	Rv 2
2021	smart	21.9528	-100.105	4	2000	5	Rv 2
2022	smart	21.9546	-100.101	4	2000	2	Rv 2
2023	smart	21.9515	-100.098	4	2000	4	Rv 2
2024	smart	21.9529	-100.092	4	2000	5	Rv 2
2001	smart	21.9249	-100.102	5	2000	4	Rv 2
2002	smart	21.9245	-100.099	5	2000	0	Rv 2
2003	smart	21.9247	-100.096	5	2000	3	Rv 2
2004	smart	21.9256	-100.093	5	2000	5	Rv 2
2005	smart	21.93	-100.103	5	2000	4	Rv 2
2006	smart	21.9304	-100.1	5	2000	3	Rv 2
2007	smart	21.9292	-100.097	5	2000	4	Rv 2
2008	smart	21.9304	-100.094	5	2000	5	Rv 2
2009	smart	21.9354	-100.102	5	2000	6	Rv 2
2010	smart	21.9366	-100.098	5	2000	4	Rv 2
2011	smart	21.9357	-100.094	5	2000	0	Rv 2
2012	smart	21.9385	-100.092	5	2000	4	Rv 2
2013	smart	21.9427	-100.104	5	2000	6	Rv 2
2014	smart	21.9418	-100.1	5	2000	3	Rv 2
2015	smart	21.9413	-100.095	5	2000	4	Rv 2
2016	smart	21.9416	-100.091	5	2000	5	Rv 2
2017	smart	21.9477	-100.103	5	2000	3	Rv 2
2018	smart	21.9467	-100.099	5	2000	0	Rv 2
2019	smart	21.9461	-100.095	5	2000	5	Rv 2
2020	smart	21.9455	-100.092	5	2000	5	Rv 2
2021	smart	21.9528	-100.105	5	2000	0	Rv 2
2022	smart	21.9546	-100.101	5	2000	4	Rv 2
2023	smart	21.9515	-100.098	5	2000	3	Rv 2
2024	smart	21.9529	-100.092	5	2000	4	Rv 2
2001	smart	21.9249	-100.102	6	2000	9	Rv 2
2002	smart	21.9245	-100.099	6	2000	12	Rv 2
2003	smart	21.9247	-100.096	6	2000	14	Rv 2
2004	smart	21.9256	-100.093	6	2000	12	Rv 2
2005	smart	21.93	-100.103	6	2000	10	Rv 2
2006	smart	21.9304	-100.1	6	2000	9	Rv 2
2007	smart	21.9292	-100.097	6	2000	7	Rv 2
2008	smart	21.9304	-100.094	6	2000	10	Rv 2
2009	smart	21.9354	-100.102	6	2000	14	Rv 2
2010	smart	21.9366	-100.098	6	2000	12	Rv 2
2011	smart	21.9357	-100.094	6	2000	17	Rv 2
2012	smart	21.9385	-100.092	6	2000	19	Rv 2
2013	smart	21.9427	-100.104	6	2000	5	Rv 2
2014	smart	21.9418	-100.1	6	2000	12	Rv 2
2015	smart	21.9413	-100.095	6	2000	14	Rv 2
2016	smart	21.9416	-100.091	6	2000	13	Rv 2
2017	smart	21.9477	-100.103	6	2000	12	Rv 2
2018	smart	21.9467	-100.099	6	2000	8	Rv 2
2019	smart	21.9461	-100.095	6	2000	10	Rv 2
2020	smart	21.9455	-100.092	6	2000	9	Rv 2
2021	smart	21.9528	-100.105	6	2000	15	Rv 2
2022	smart	21.9546	-100.101	6	2000	12	Rv 2
2023	smart	21.9515	-100.098	6	2000	25	Rv 2
2024	smart	21.9529	-100.092	6	2000	16	Rv 2
2001	smart	21.9249	-100.102	7	2000	22	Rv 2
2002	smart	21.9245	-100.099	7	2000	18	Rv 2
2003	smart	21.9247	-100.096	7	2000	24	Rv 2
2004	smart	21.9256	-100.093	7	2000	19	Rv 2
2005	smart	21.93	-100.103	7	2000	15	Rv 2
2006	smart	21.9304	-100.1	7	2000	14	Rv 2
2007	smart	21.9292	-100.097	7	2000	26	Rv 2
2008	smart	21.9304	-100.094	7	2000	21	Rv 2
2009	smart	21.9354	-100.102	7	2000	0	Rv 2
2010	smart	21.9366	-100.098	7	2000	22	Rv 2
2011	smart	21.9357	-100.094	7	2000	16	Rv 2
2012	smart	21.9385	-100.092	7	2000	19	Rv 2
2013	smart	21.9427	-100.104	7	2000	29	Rv 2
2014	smart	21.9418	-100.1	7	2000	23	Rv 2
2015	smart	21.9413	-100.095	7	2000	27	Rv 2
2016	smart	21.9416	-100.091	7	2000	25	Rv 2
2017	smart	21.9477	-100.103	7	2000	14	Rv 2
2018	smart	21.9467	-100.099	7	2000	18	Rv 2
2019	smart	21.9461	-100.095	7	2000	24	Rv 2
2020	smart	21.9455	-100.092	7	2000	22	Rv 2
2021	smart	21.9528	-100.105	7	2000	17	Rv 2
2022	smart	21.9546	-100.101	7	2000	21	Rv 2
2023	smart	21.9515	-100.098	7	2000	14	Rv 2
2024	smart	21.9529	-100.092	7	2000	25	Rv 2
2001	smart	21.9249	-100.102	8	2000	33	Rv 2
2002	smart	21.9245	-100.099	8	2000	29	Rv 2
2003	smart	21.9247	-100.096	8	2000	31	Rv 2
2004	smart	21.9256	-100.093	8	2000	19	Rv 2
2005	smart	21.93	-100.103	8	2000	22	Rv 2
2006	smart	21.9304	-100.1	8	2000	34	Rv 2
2007	smart	21.9292	-100.097	8	2000	36	Rv 2
2008	smart	21.9304	-100.094	8	2000	28	Rv 2
2009	smart	21.9354	-100.102	8	2000	49	Rv 2
2010	smart	21.9366	-100.098	8	2000	23	Rv 2
2011	smart	21.9357	-100.094	8	2000	28	Rv 2
2012	smart	21.9385	-100.092	8	2000	33	Rv 2
2013	smart	21.9427	-100.104	8	2000	24	Rv 2
2014	smart	21.9418	-100.1	8	2000	25	Rv 2
2015	smart	21.9413	-100.095	8	2000	34	Rv 2
2016	smart	21.9416	-100.091	8	2000	31	Rv 2
2017	smart	21.9477	-100.103	8	2000	33	Rv 2
2018	smart	21.9467	-100.099	8	2000	28	Rv 2
2019	smart	21.9461	-100.095	8	2000	19	Rv 2
2020	smart	21.9455	-100.092	8	2000	23	Rv 2
2021	smart	21.9528	-100.105	8	2000	27	Rv 2
2022	smart	21.9546	-100.101	8	2000	36	Rv 2
2023	smart	21.9515	-100.098	8	2000	30	Rv 2
2024	smart	21.9529	-100.092	8	2000	22	Rv 2
2001	smart	21.9249	-100.102	9	2000	55	Rv 2
2002	smart	21.9245	-100.099	9	2000	42	Rv 2
2003	smart	21.9247	-100.096	9	2000	43	Rv 2
2004	smart	21.9256	-100.093	9	2000	87	Rv 2
2005	smart	21.93	-100.103	9	2000	44	Rv 2
2006	smart	21.9304	-100.1	9	2000	0	Rv 2
2007	smart	21.9292	-100.097	9	2000	36	Rv 2
2008	smart	21.9304	-100.094	9	2000	47	Rv 2
2009	smart	21.9354	-100.102	9	2000	59	Rv 2
2010	smart	21.9366	-100.098	9	2000	64	Rv 2
2011	smart	21.9357	-100.094	9	2000	61	Rv 2
2012	smart	21.9385	-100.092	9	2000	54	Rv 2
2013	smart	21.9427	-100.104	9	2000	42	Rv 2
2014	smart	21.9418	-100.1	9	2000	0	Rv 2
2015	smart	21.9413	-100.095	9	2000	17	Rv 2
2016	smart	21.9416	-100.091	9	2000	82	Rv 2
2017	smart	21.9477	-100.103	9	2000	55	Rv 2
2018	smart	21.9467	-100.099	9	2000	72	Rv 2
2019	smart	21.9461	-100.095	9	2000	0	Rv 2
2020	smart	21.9455	-100.092	9	2000	47	Rv 2
2021	smart	21.9528	-100.105	9	2000	56	Rv 2
2022	smart	21.9546	-100.101	9	2000	0	Rv 2
2023	smart	21.9515	-100.098	9	2000	77	Rv 2
2024	smart	21.9529	-100.092	9	2000	64	Rv 2
2001	smart	21.9249	-100.102	10	2000	31	Rv 2
2002	smart	21.9245	-100.099	10	2000	22	Rv 2
2003	smart	21.9247	-100.096	10	2000	31	Rv 2
2004	smart	21.9256	-100.093	10	2000	25	Rv 2
2005	smart	21.93	-100.103	10	2000	33	Rv 2
2006	smart	21.9304	-100.1	10	2000	21	Rv 2
2007	smart	21.9292	-100.097	10	2000	20	Rv 2
2008	smart	21.9304	-100.094	10	2000	19	Rv 2
2009	smart	21.9354	-100.102	10	2000	31	Rv 2
2010	smart	21.9366	-100.098	10	2000	28	Rv 2
2011	smart	21.9357	-100.094	10	2000	25	Rv 2
2012	smart	21.9385	-100.092	10	2000	24	Rv 2
2013	smart	21.9427	-100.104	10	2000	37	Rv 2
2014	smart	21.9418	-100.1	10	2000	26	Rv 2
2015	smart	21.9413	-100.095	10	2000	22	Rv 2
2016	smart	21.9416	-100.091	10	2000	25	Rv 2
2017	smart	21.9477	-100.103	10	2000	38	Rv 2
2018	smart	21.9467	-100.099	10	2000	34	Rv 2
2019	smart	21.9461	-100.095	10	2000	22	Rv 2
2020	smart	21.9455	-100.092	10	2000	16	Rv 2
2021	smart	21.9528	-100.105	10	2000	18	Rv 2
2022	smart	21.9546	-100.101	10	2000	20	Rv 2
2023	smart	21.9515	-100.098	10	2000	31	Rv 2
2024	smart	21.9529	-100.092	10	2000	33	Rv 2
2001	smart	21.9249	-100.102	11	1500	38	Rv 2
2002	smart	21.9245	-100.099	11	1500	54	Rv 2
2003	smart	21.9247	-100.096	11	1500	47	Rv 2
2004	smart	21.9256	-100.093	11	1500	44	Rv 2
2005	smart	21.93	-100.103	11	1500	36	Rv 2
2006	smart	21.9304	-100.1	11	1500	65	Rv 2
2007	smart	21.9292	-100.097	11	1500	55	Rv 2
2008	smart	21.9304	-100.094	11	1500	44	Rv 2
2009	smart	21.9354	-100.102	11	1500	59	Rv 2
2010	smart	21.9366	-100.098	11	1500	47	Rv 2
2011	smart	21.9357	-100.094	11	1500	0	Rv 2
2012	smart	21.9385	-100.092	11	1500	36	Rv 2
2013	smart	21.9427	-100.104	11	1500	44	Rv 2
2014	smart	21.9418	-100.1	11	1500	87	Rv 2
2015	smart	21.9413	-100.095	11	1500	13	Rv 2
2016	smart	21.9416	-100.091	11	1500	69	Rv 2
2017	smart	21.9477	-100.103	11	1500	0	Rv 2
2018	smart	21.9467	-100.099	11	1500	58	Rv 2
2019	smart	21.9461	-100.095	11	1500	75	Rv 2
2020	smart	21.9455	-100.092	11	1500	49	Rv 2
2021	smart	21.9528	-100.105	11	1500	71	Rv 2
2022	smart	21.9546	-100.101	11	1500	39	Rv 2
2023	smart	21.9515	-100.098	11	1500	36	Rv 2
2024	smart	21.9529	-100.092	11	1500	58	Rv 2
2001	smart	21.9249	-100.102	12	1500	31	Rv 2
2002	smart	21.9245	-100.099	12	1500	26	Rv 2
2003	smart	21.9247	-100.096	12	1500	19	Rv 2
2004	smart	21.9256	-100.093	12	1500	23	Rv 2
2005	smart	21.93	-100.103	12	1500	28	Rv 2
2006	smart	21.9304	-100.1	12	1500	22	Rv 2
2007	smart	21.9292	-100.097	12	1500	24	Rv 2
2008	smart	21.9304	-100.094	12	1500	33	Rv 2
2009	smart	21.9354	-100.102	12	1500	19	Rv 2
2010	smart	21.9366	-100.098	12	1500	24	Rv 2
2011	smart	21.9357	-100.094	12	1500	22	Rv 2
2012	smart	21.9385	-100.092	12	1500	18	Rv 2
2013	smart	21.9427	-100.104	12	1500	25	Rv 2
2014	smart	21.9418	-100.1	12	1500	17	Rv 2
2015	smart	21.9413	-100.095	12	1500	26	Rv 2
2016	smart	21.9416	-100.091	12	1500	46	Rv 2
2017	smart	21.9477	-100.103	12	1500	29	Rv 2
2018	smart	21.9467	-100.099	12	1500	27	Rv 2
2019	smart	21.9461	-100.095	12	1500	19	Rv 2
2020	smart	21.9455	-100.092	12	1500	22	Rv 2
2021	smart	21.9528	-100.105	12	1500	18	Rv 2
2022	smart	21.9546	-100.101	12	1500	25	Rv 2
2023	smart	21.9515	-100.098	12	1500	27	Rv 2
2024	smart	21.9529	-100.092	12	1500	18	Rv 2
2001	smart	21.9249	-100.102	13	1500	44	Rv 2
2002	smart	21.9245	-100.099	13	1500	31	Rv 2
2003	smart	21.9247	-100.096	13	1500	40	Rv 2
2004	smart	21.9256	-100.093	13	1500	29	Rv 2
2005	smart	21.93	-100.103	13	1500	33	Rv 2
2006	smart	21.9304	-100.1	13	1500	16	Rv 2
2007	smart	21.9292	-100.097	13	1500	35	Rv 2
2008	smart	21.9304	-100.094	13	1500	44	Rv 2
2009	smart	21.9354	-100.102	13	1500	51	Rv 2
2010	smart	21.9366	-100.098	13	1500	40	Rv 2
2011	smart	21.9357	-100.094	13	1500	37	Rv 2
2012	smart	21.9385	-100.092	13	1500	29	Rv 2
2013	smart	21.9427	-100.104	13	1500	41	Rv 2
2014	smart	21.9418	-100.1	13	1500	60	Rv 2
2015	smart	21.9413	-100.095	13	1500	44	Rv 2
2016	smart	21.9416	-100.091	13	1500	41	Rv 2
2017	smart	21.9477	-100.103	13	1500	24	Rv 2
2018	smart	21.9467	-100.099	13	1500	35	Rv 2
2019	smart	21.9461	-100.095	13	1500	38	Rv 2
2020	smart	21.9455	-100.092	13	1500	29	Rv 2
2021	smart	21.9528	-100.105	13	1500	39	Rv 2
2022	smart	21.9546	-100.101	13	1500	43	Rv 2
2023	smart	21.9515	-100.098	13	1500	46	Rv 2
2024	smart	21.9529	-100.092	13	1500	26	Rv 2
2001	smart	21.9249	-100.102	14	1500	16	Rv 2
2002	smart	21.9245	-100.099	14	1500	10	Rv 2
2003	smart	21.9247	-100.096	14	1500	19	Rv 2
2004	smart	21.9256	-100.093	14	1500	14	Rv 2
2005	smart	21.93	-100.103	14	1500	6	Rv 2
2006	smart	21.9304	-100.1	14	1500	9	Rv 2
2007	smart	21.9292	-100.097	14	1500	11	Rv 2
2008	smart	21.9304	-100.094	14	1500	14	Rv 2
2009	smart	21.9354	-100.102	14	1500	0	Rv 2
2010	smart	21.9366	-100.098	14	1500	7	Rv 2
2011	smart	21.9357	-100.094	14	1500	10	Rv 2
2012	smart	21.9385	-100.092	14	1500	13	Rv 2
2013	smart	21.9427	-100.104	14	1500	0	Rv 2
2014	smart	21.9418	-100.1	14	1500	11	Rv 2
2015	smart	21.9413	-100.095	14	1500	7	Rv 2
2016	smart	21.9416	-100.091	14	1500	30	Rv 2
2017	smart	21.9477	-100.103	14	1500	12	Rv 2
2018	smart	21.9467	-100.099	14	1500	11	Rv 2
2019	smart	21.9461	-100.095	14	1500	13	Rv 2
2020	smart	21.9455	-100.092	14	1500	14	Rv 2
2021	smart	21.9528	-100.105	14	1500	18	Rv 2
2022	smart	21.9546	-100.101	14	1500	6	Rv 2
2023	smart	21.9515	-100.098	14	1500	20	Rv 2
2024	smart	21.9529	-100.092	14	1500	13	Rv 2
2001	smart	21.9249	-100.102	15	1500	34	Rv 2
2002	smart	21.9245	-100.099	15	1500	42	Rv 2
2003	smart	21.9247	-100.096	15	1500	16	Rv 2
2004	smart	21.9256	-100.093	15	1500	0	Rv 2
2005	smart	21.93	-100.103	15	1500	39	Rv 2
2006	smart	21.9304	-100.1	15	1500	31	Rv 2
2007	smart	21.9292	-100.097	15	1500	56	Rv 2
2008	smart	21.9304	-100.094	15	1500	29	Rv 2
2009	smart	21.9354	-100.102	15	1500	19	Rv 2
2010	smart	21.9366	-100.098	15	1500	40	Rv 2
2011	smart	21.9357	-100.094	15	1500	23	Rv 2
2012	smart	21.9385	-100.092	15	1500	37	Rv 2
2013	smart	21.9427	-100.104	15	1500	30	Rv 2
2014	smart	21.9418	-100.1	15	1500	0	Rv 2
2015	smart	21.9413	-100.095	15	1500	39	Rv 2
2016	smart	21.9416	-100.091	15	1500	34	Rv 2
2017	smart	21.9477	-100.103	15	1500	35	Rv 2
2018	smart	21.9467	-100.099	15	1500	29	Rv 2
2019	smart	21.9461	-100.095	15	1500	0	Rv 2
2020	smart	21.9455	-100.092	15	1500	48	Rv 2
2021	smart	21.9528	-100.105	15	1500	37	Rv 2
2022	smart	21.9546	-100.101	15	1500	46	Rv 2
2023	smart	21.9515	-100.098	15	1500	38	Rv 2
2024	smart	21.9529	-100.092	15	1500	0	Rv 2
2001	smart	21.9249	-100.102	16	1500	19	Rv 2
2002	smart	21.9245	-100.099	16	1500	20	Rv 2
2003	smart	21.9247	-100.096	16	1500	17	Rv 2
2004	smart	21.9256	-100.093	16	1500	45	Rv 2
2005	smart	21.93	-100.103	16	1500	16	Rv 2
2006	smart	21.9304	-100.1	16	1500	22	Rv 2
2007	smart	21.9292	-100.097	16	1500	28	Rv 2
2008	smart	21.9304	-100.094	16	1500	31	Rv 2
2009	smart	21.9354	-100.102	16	1500	29	Rv 2
2010	smart	21.9366	-100.098	16	1500	33	Rv 2
2011	smart	21.9357	-100.094	16	1500	19	Rv 2
2012	smart	21.9385	-100.092	16	1500	34	Rv 2
2013	smart	21.9427	-100.104	16	1500	22	Rv 2
2014	smart	21.9418	-100.1	16	1500	29	Rv 2
2015	smart	21.9413	-100.095	16	1500	15	Rv 2
2016	smart	21.9416	-100.091	16	1500	0	Rv 2
2017	smart	21.9477	-100.103	16	1500	7	Rv 2
2018	smart	21.9467	-100.099	16	1500	47	Rv 2
2019	smart	21.9461	-100.095	16	1500	16	Rv 2
2020	smart	21.9455	-100.092	16	1500	22	Rv 2
2021	smart	21.9528	-100.105	16	1500	0	Rv 2
2022	smart	21.9546	-100.101	16	1500	33	Rv 2
2023	smart	21.9515	-100.098	16	1500	18	Rv 2
2024	smart	21.9529	-100.092	16	1500	24	Rv 2
2001	smart	21.9249	-100.102	17	1500	22	Rv 2
2002	smart	21.9245	-100.099	17	1500	18	Rv 2
2003	smart	21.9247	-100.096	17	1500	23	Rv 2
2004	smart	21.9256	-100.093	17	1500	25	Rv 2
2005	smart	21.93	-100.103	17	1500	20	Rv 2
2006	smart	21.9304	-100.1	17	1500	24	Rv 2
2007	smart	21.9292	-100.097	17	1500	18	Rv 2
2008	smart	21.9304	-100.094	17	1500	19	Rv 2
2009	smart	21.9354	-100.102	17	1500	12	Rv 2
2010	smart	21.9366	-100.098	17	1500	13	Rv 2
2011	smart	21.9357	-100.094	17	1500	18	Rv 2
2012	smart	21.9385	-100.092	17	1500	22	Rv 2
2013	smart	21.9427	-100.104	17	1500	19	Rv 2
2014	smart	21.9418	-100.1	17	1500	17	Rv 2
2015	smart	21.9413	-100.095	17	1500	15	Rv 2
2016	smart	21.9416	-100.091	17	1500	14	Rv 2
2017	smart	21.9477	-100.103	17	1500	19	Rv 2
2018	smart	21.9467	-100.099	17	1500	18	Rv 2
2019	smart	21.9461	-100.095	17	1500	22	Rv 2
2020	smart	21.9455	-100.092	17	1500	16	Rv 2
2021	smart	21.9528	-100.105	17	1500	25	Rv 2
2022	smart	21.9546	-100.101	17	1500	21	Rv 2
2023	smart	21.9515	-100.098	17	1500	31	Rv 2
2024	smart	21.9529	-100.092	17	1500	11	Rv 2
2001	smart	21.9249	-100.102	18	1500	7	Rv 2
2002	smart	21.9245	-100.099	18	1500	13	Rv 2
2003	smart	21.9247	-100.096	18	1500	20	Rv 2
2004	smart	21.9256	-100.093	18	1500	14	Rv 2
2005	smart	21.93	-100.103	18	1500	16	Rv 2
2006	smart	21.9304	-100.1	18	1500	12	Rv 2
2007	smart	21.9292	-100.097	18	1500	6	Rv 2
2008	smart	21.9304	-100.094	18	1500	8	Rv 2
2009	smart	21.9354	-100.102	18	1500	11	Rv 2
2010	smart	21.9366	-100.098	18	1500	8	Rv 2
2011	smart	21.9357	-100.094	18	1500	3	Rv 2
2012	smart	21.9385	-100.092	18	1500	16	Rv 2
2013	smart	21.9427	-100.104	18	1500	14	Rv 2
2014	smart	21.9418	-100.1	18	1500	12	Rv 2
2015	smart	21.9413	-100.095	18	1500	1	Rv 2
2016	smart	21.9416	-100.091	18	1500	18	Rv 2
2017	smart	21.9477	-100.103	18	1500	22	Rv 2
2018	smart	21.9467	-100.099	18	1500	18	Rv 2
2019	smart	21.9461	-100.095	18	1500	14	Rv 2
2020	smart	21.9455	-100.092	18	1500	24	Rv 2
2021	smart	21.9528	-100.105	18	1500	22	Rv 2
2022	smart	21.9546	-100.101	18	1500	33	Rv 2
2023	smart	21.9515	-100.098	18	1500	12	Rv 2
2024	smart	21.9529	-100.092	18	1500	10	Rv 2
2001	smart	21.9249	-100.102	19	1500	22	Rv 2
2002	smart	21.9245	-100.099	19	1500	31	Rv 2
2003	smart	21.9247	-100.096	19	1500	29	Rv 2
2004	smart	21.9256	-100.093	19	1500	35	Rv 2
2005	smart	21.93	-100.103	19	1500	36	Rv 2
2006	smart	21.9304	-100.1	19	1500	32	Rv 2
2007	smart	21.9292	-100.097	19	1500	34	Rv 2
2008	smart	21.9304	-100.094	19	1500	26	Rv 2
2009	smart	21.9354	-100.102	19	1500	29	Rv 2
2010	smart	21.9366	-100.098	19	1500	19	Rv 2
2011	smart	21.9357	-100.094	19	1500	31	Rv 2
2012	smart	21.9385	-100.092	19	1500	25	Rv 2
2013	smart	21.9427	-100.104	19	1500	36	Rv 2
2014	smart	21.9418	-100.1	19	1500	24	Rv 2
2015	smart	21.9413	-100.095	19	1500	26	Rv 2
2016	smart	21.9416	-100.091	19	1500	23	Rv 2
2017	smart	21.9477	-100.103	19	1500	22	Rv 2
2018	smart	21.9467	-100.099	19	1500	19	Rv 2
2019	smart	21.9461	-100.095	19	1500	33	Rv 2
2020	smart	21.9455	-100.092	19	1500	18	Rv 2
2021	smart	21.9528	-100.105	19	1500	14	Rv 2
2022	smart	21.9546	-100.101	19	1500	41	Rv 2
2023	smart	21.9515	-100.098	19	1500	35	Rv 2
2024	smart	21.9529	-100.092	19	1500	25	Rv 2
2001	smart	21.9249	-100.102	20	1500	19	Rv 2
2002	smart	21.9245	-100.099	20	1500	10	Rv 2
2003	smart	21.9247	-100.096	20	1500	11	Rv 2
2004	smart	21.9256	-100.093	20	1500	14	Rv 2
2005	smart	21.93	-100.103	20	1500	15	Rv 2
2006	smart	21.9304	-100.1	20	1500	12	Rv 2
2007	smart	21.9292	-100.097	20	1500	8	Rv 2
2008	smart	21.9304	-100.094	20	1500	12	Rv 2
2009	smart	21.9354	-100.102	20	1500	20	Rv 2
2010	smart	21.9366	-100.098	20	1500	13	Rv 2
2011	smart	21.9357	-100.094	20	1500	16	Rv 2
2012	smart	21.9385	-100.092	20	1500	20	Rv 2
2013	smart	21.9427	-100.104	20	1500	17	Rv 2
2014	smart	21.9418	-100.1	20	1500	0	Rv 2
2015	smart	21.9413	-100.095	20	1500	15	Rv 2
2016	smart	21.9416	-100.091	20	1500	14	Rv 2
2017	smart	21.9477	-100.103	20	1500	9	Rv 2
2018	smart	21.9467	-100.099	20	1500	18	Rv 2
2019	smart	21.9461	-100.095	20	1500	7	Rv 2
2020	smart	21.9455	-100.092	20	1500	4	Rv 2
2021	smart	21.9528	-100.105	20	1500	14	Rv 2
2022	smart	21.9546	-100.101	20	1500	33	Rv 2
2023	smart	21.9515	-100.098	20	1500	18	Rv 2
2024	smart	21.9529	-100.092	20	1500	20	Rv 2
2001	smart	21.9249	-100.102	21	1000	10	Rv 2
2002	smart	21.9245	-100.099	21	1000	21	Rv 2
2003	smart	21.9247	-100.096	21	1000	14	Rv 2
2004	smart	21.9256	-100.093	21	1000	18	Rv 2
2005	smart	21.93	-100.103	21	1000	27	Rv 2
2006	smart	21.9304	-100.1	21	1000	23	Rv 2
2007	smart	21.9292	-100.097	21	1000	19	Rv 2
2008	smart	21.9304	-100.094	21	1000	17	Rv 2
2009	smart	21.9354	-100.102	21	1000	25	Rv 2
2010	smart	21.9366	-100.098	21	1000	30	Rv 2
2011	smart	21.9357	-100.094	21	1000	22	Rv 2
2012	smart	21.9385	-100.092	21	1000	18	Rv 2
2013	smart	21.9427	-100.104	21	1000	13	Rv 2
2014	smart	21.9418	-100.1	21	1000	0	Rv 2
2015	smart	21.9413	-100.095	21	1000	12	Rv 2
2016	smart	21.9416	-100.091	21	1000	22	Rv 2
2017	smart	21.9477	-100.103	21	1000	15	Rv 2
2018	smart	21.9467	-100.099	21	1000	18	Rv 2
2019	smart	21.9461	-100.095	21	1000	27	Rv 2
2020	smart	21.9455	-100.092	21	1000	22	Rv 2
2021	smart	21.9528	-100.105	21	1000	0	Rv 2
2022	smart	21.9546	-100.101	21	1000	24	Rv 2
2023	smart	21.9515	-100.098	21	1000	37	Rv 2
2024	smart	21.9529	-100.092	21	1000	20	Rv 2
2001	smart	21.9249	-100.102	22	1000	16	Rv 2
2002	smart	21.9245	-100.099	22	1000	10	Rv 2
2003	smart	21.9247	-100.096	22	1000	12	Rv 2
2004	smart	21.9256	-100.093	22	1000	8	Rv 2
2005	smart	21.93	-100.103	22	1000	17	Rv 2
2006	smart	21.9304	-100.1	22	1000	15	Rv 2
2007	smart	21.9292	-100.097	22	1000	13	Rv 2
2008	smart	21.9304	-100.094	22	1000	14	Rv 2
2009	smart	21.9354	-100.102	22	1000	20	Rv 2
2010	smart	21.9366	-100.098	22	1000	8	Rv 2
2011	smart	21.9357	-100.094	22	1000	10	Rv 2
2012	smart	21.9385	-100.092	22	1000	8	Rv 2
2013	smart	21.9427	-100.104	22	1000	11	Rv 2
2014	smart	21.9418	-100.1	22	1000	9	Rv 2
2015	smart	21.9413	-100.095	22	1000	17	Rv 2
2016	smart	21.9416	-100.091	22	1000	22	Rv 2
2017	smart	21.9477	-100.103	22	1000	10	Rv 2
2018	smart	21.9467	-100.099	22	1000	8	Rv 2
2019	smart	21.9461	-100.095	22	1000	9	Rv 2
2020	smart	21.9455	-100.092	22	1000	17	Rv 2
2021	smart	21.9528	-100.105	22	1000	6	Rv 2
2022	smart	21.9546	-100.101	22	1000	10	Rv 2
2023	smart	21.9515	-100.098	22	1000	31	Rv 2
2024	smart	21.9529	-100.092	22	1000	15	Rv 2
2001	smart	21.9249	-100.102	23	1000	12	Rv 2
2002	smart	21.9245	-100.099	23	1000	19	Rv 2
2003	smart	21.9247	-100.096	23	1000	25	Rv 2
2004	smart	21.9256	-100.093	23	1000	25	Rv 2
2005	smart	21.93	-100.103	23	1000	19	Rv 2
2006	smart	21.9304	-100.1	23	1000	25	Rv 2
2007	smart	21.9292	-100.097	23	1000	27	Rv 2
2008	smart	21.9304	-100.094	23	1000	32	Rv 2
2009	smart	21.9354	-100.102	23	1000	31	Rv 2
2010	smart	21.9366	-100.098	23	1000	39	Rv 2
2011	smart	21.9357	-100.094	23	1000	22	Rv 2
2012	smart	21.9385	-100.092	23	1000	18	Rv 2
2013	smart	21.9427	-100.104	23	1000	25	Rv 2
2014	smart	21.9418	-100.1	23	1000	26	Rv 2
2015	smart	21.9413	-100.095	23	1000	27	Rv 2
2016	smart	21.9416	-100.091	23	1000	10	Rv 2
2017	smart	21.9477	-100.103	23	1000	19	Rv 2
2018	smart	21.9467	-100.099	23	1000	20	Rv 2
2019	smart	21.9461	-100.095	23	1000	29	Rv 2
2020	smart	21.9455	-100.092	23	1000	26	Rv 2
2021	smart	21.9528	-100.105	23	1000	33	Rv 2
2022	smart	21.9546	-100.101	23	1000	39	Rv 2
2023	smart	21.9515	-100.098	23	1000	22	Rv 2
2024	smart	21.9529	-100.092	23	1000	35	Rv 2
2001	smart	21.9249	-100.102	24	1000	25	Rv 2
2002	smart	21.9245	-100.099	24	1000	33	Rv 2
2003	smart	21.9247	-100.096	24	1000	34	Rv 2
2004	smart	21.9256	-100.093	24	1000	26	Rv 2
2005	smart	21.93	-100.103	24	1000	38	Rv 2
2006	smart	21.9304	-100.1	24	1000	27	Rv 2
2007	smart	21.9292	-100.097	24	1000	32	Rv 2
2008	smart	21.9304	-100.094	24	1000	29	Rv 2
2009	smart	21.9354	-100.102	24	1000	33	Rv 2
2010	smart	21.9366	-100.098	24	1000	0	Rv 2
2011	smart	21.9357	-100.094	24	1000	19	Rv 2
2012	smart	21.9385	-100.092	24	1000	33	Rv 2
2013	smart	21.9427	-100.104	24	1000	45	Rv 2
2014	smart	21.9418	-100.1	24	1000	26	Rv 2
2015	smart	21.9413	-100.095	24	1000	28	Rv 2
2016	smart	21.9416	-100.091	24	1000	35	Rv 2
2017	smart	21.9477	-100.103	24	1000	36	Rv 2
2018	smart	21.9467	-100.099	24	1000	20	Rv 2
2019	smart	21.9461	-100.095	24	1000	39	Rv 2
2020	smart	21.9455	-100.092	24	1000	48	Rv 2
2021	smart	21.9528	-100.105	24	1000	52	Rv 2
2022	smart	21.9546	-100.101	24	1000	40	Rv 2
2023	smart	21.9515	-100.098	24	1000	38	Rv 2
2024	smart	21.9529	-100.092	24	1000	35	Rv 2
2001	smart	21.9249	-100.102	25	1000	15	Rv 2
2002	smart	21.9245	-100.099	25	1000	24	Rv 2
2003	smart	21.9247	-100.096	25	1000	29	Rv 2
2004	smart	21.9256	-100.093	25	1000	33	Rv 2
2005	smart	21.93	-100.103	25	1000	45	Rv 2
2006	smart	21.9304	-100.1	25	1000	0	Rv 2
2007	smart	21.9292	-100.097	25	1000	33	Rv 2
2008	smart	21.9304	-100.094	25	1000	35	Rv 2
2009	smart	21.9354	-100.102	25	1000	22	Rv 2
2010	smart	21.9366	-100.098	25	1000	34	Rv 2
2011	smart	21.9357	-100.094	25	1000	29	Rv 2
2012	smart	21.9385	-100.092	25	1000	22	Rv 2
2013	smart	21.9427	-100.104	25	1000	38	Rv 2
2014	smart	21.9418	-100.1	25	1000	16	Rv 2
2015	smart	21.9413	-100.095	25	1000	41	Rv 2
2016	smart	21.9416	-100.091	25	1000	25	Rv 2
2017	smart	21.9477	-100.103	25	1000	38	Rv 2
2018	smart	21.9467	-100.099	25	1000	33	Rv 2
2019	smart	21.9461	-100.095	25	1000	26	Rv 2
2020	smart	21.9455	-100.092	25	1000	0	Rv 2
2021	smart	21.9528	-100.105	25	1000	45	Rv 2
2022	smart	21.9546	-100.101	25	1000	47	Rv 2
2023	smart	21.9515	-100.098	25	1000	17	Rv 2
2024	smart	21.9529	-100.092	25	1000	23	Rv 2
2001	smart	21.9249	-100.102	26	1000	41	Rv 2
2002	smart	21.9245	-100.099	26	1000	18	Rv 2
2003	smart	21.9247	-100.096	26	1000	25	Rv 2
2004	smart	21.9256	-100.093	26	1000	34	Rv 2
2005	smart	21.93	-100.103	26	1000	22	Rv 2
2006	smart	21.9304	-100.1	26	1000	29	Rv 2
2007	smart	21.9292	-100.097	26	1000	28	Rv 2
2008	smart	21.9304	-100.094	26	1000	31	Rv 2
2009	smart	21.9354	-100.102	26	1000	28	Rv 2
2010	smart	21.9366	-100.098	26	1000	29	Rv 2
2011	smart	21.9357	-100.094	26	1000	25	Rv 2
2012	smart	21.9385	-100.092	26	1000	35	Rv 2
2013	smart	21.9427	-100.104	26	1000	36	Rv 2
2014	smart	21.9418	-100.1	26	1000	34	Rv 2
2015	smart	21.9413	-100.095	26	1000	33	Rv 2
2016	smart	21.9416	-100.091	26	1000	29	Rv 2
2017	smart	21.9477	-100.103	26	1000	28	Rv 2
2018	smart	21.9467	-100.099	26	1000	35	Rv 2
2019	smart	21.9461	-100.095	26	1000	44	Rv 2
2020	smart	21.9455	-100.092	26	1000	36	Rv 2
2021	smart	21.9528	-100.105	26	1000	25	Rv 2
2022	smart	21.9546	-100.101	26	1000	38	Rv 2
2023	smart	21.9515	-100.098	26	1000	38	Rv 2
2024	smart	21.9529	-100.092	26	1000	42	Rv 2
2001	smart	21.9249	-100.102	27	1000	61	Rv 2
2002	smart	21.9245	-100.099	27	1000	58	Rv 2
2003	smart	21.9247	-100.096	27	1000	56	Rv 2
2004	smart	21.9256	-100.093	27	1000	50	Rv 2
2005	smart	21.93	-100.103	27	1000	47	Rv 2
2006	smart	21.9304	-100.1	27	1000	52	Rv 2
2007	smart	21.9292	-100.097	27	1000	47	Rv 2
2008	smart	21.9304	-100.094	27	1000	51	Rv 2
2009	smart	21.9354	-100.102	27	1000	46	Rv 2
2010	smart	21.9366	-100.098	27	1000	39	Rv 2
2011	smart	21.9357	-100.094	27	1000	57	Rv 2
2012	smart	21.9385	-100.092	27	1000	58	Rv 2
2013	smart	21.9427	-100.104	27	1000	47	Rv 2
2014	smart	21.9418	-100.1	27	1000	48	Rv 2
2015	smart	21.9413	-100.095	27	1000	56	Rv 2
2016	smart	21.9416	-100.091	27	1000	57	Rv 2
2017	smart	21.9477	-100.103	27	1000	71	Rv 2
2018	smart	21.9467	-100.099	27	1000	25	Rv 2
2019	smart	21.9461	-100.095	27	1000	45	Rv 2
2020	smart	21.9455	-100.092	27	1000	39	Rv 2
2021	smart	21.9528	-100.105	27	1000	48	Rv 2
2022	smart	21.9546	-100.101	27	1000	68	Rv 2
2023	smart	21.9515	-100.098	27	1000	69	Rv 2
2024	smart	21.9529	-100.092	27	1000	65	Rv 2
2001	smart	21.9249	-100.102	28	1000	45	Rv 2
2002	smart	21.9245	-100.099	28	1000	56	Rv 2
2003	smart	21.9247	-100.096	28	1000	28	Rv 2
2004	smart	21.9256	-100.093	28	1000	47	Rv 2
2005	smart	21.93	-100.103	28	1000	36	Rv 2
2006	smart	21.9304	-100.1	28	1000	35	Rv 2
2007	smart	21.9292	-100.097	28	1000	25	Rv 2
2008	smart	21.9304	-100.094	28	1000	17	Rv 2
2009	smart	21.9354	-100.102	28	1000	23	Rv 2
2010	smart	21.9366	-100.098	28	1000	26	Rv 2
2011	smart	21.9357	-100.094	28	1000	55	Rv 2
2012	smart	21.9385	-100.092	28	1000	46	Rv 2
2013	smart	21.9427	-100.104	28	1000	39	Rv 2
2014	smart	21.9418	-100.1	28	1000	0	Rv 2
2015	smart	21.9413	-100.095	28	1000	47	Rv 2
2016	smart	21.9416	-100.091	28	1000	56	Rv 2
2017	smart	21.9477	-100.103	28	1000	29	Rv 2
2018	smart	21.9467	-100.099	28	1000	38	Rv 2
2019	smart	21.9461	-100.095	28	1000	0	Rv 2
2020	smart	21.9455	-100.092	28	1000	55	Rv 2
2021	smart	21.9528	-100.105	28	1000	71	Rv 2
2022	smart	21.9546	-100.101	28	1000	49	Rv 2
2023	smart	21.9515	-100.098	28	1000	39	Rv 2
2024	smart	21.9529	-100.092	28	1000	44	Rv 2
2001	smart	21.9249	-100.102	29	1000	31	Rv 2
2002	smart	21.9245	-100.099	29	1000	47	Rv 2
2003	smart	21.9247	-100.096	29	1000	58	Rv 2
2004	smart	21.9256	-100.093	29	1000	49	Rv 2
2005	smart	21.93	-100.103	29	1000	60	Rv 2
2006	smart	21.9304	-100.1	29	1000	51	Rv 2
2007	smart	21.9292	-100.097	29	1000	46	Rv 2
2008	smart	21.9304	-100.094	29	1000	51	Rv 2
2009	smart	21.9354	-100.102	29	1000	51	Rv 2
2010	smart	21.9366	-100.098	29	1000	39	Rv 2
2011	smart	21.9357	-100.094	29	1000	52	Rv 2
2012	smart	21.9385	-100.092	29	1000	40	Rv 2
2013	smart	21.9427	-100.104	29	1000	45	Rv 2
2014	smart	21.9418	-100.1	29	1000	39	Rv 2
2015	smart	21.9413	-100.095	29	1000	38	Rv 2
2016	smart	21.9416	-100.091	29	1000	44	Rv 2
2017	smart	21.9477	-100.103	29	1000	28	Rv 2
2018	smart	21.9467	-100.099	29	1000	28	Rv 2
2019	smart	21.9461	-100.095	29	1000	35	Rv 2
2020	smart	21.9455	-100.092	29	1000	46	Rv 2
2021	smart	21.9528	-100.105	29	1000	37	Rv 2
2022	smart	21.9546	-100.101	29	1000	55	Rv 2
2023	smart	21.9515	-100.098	29	1000	48	Rv 2
2024	smart	21.9529	-100.092	29	1000	37	Rv 2
2001	smart	21.9249	-100.102	30	1000	44	Rv 2
2002	smart	21.9245	-100.099	30	1000	38	Rv 2
2003	smart	21.9247	-100.096	30	1000	19	Rv 2
2004	smart	21.9256	-100.093	30	1000	41	Rv 2
2005	smart	21.93	-100.103	30	1000	38	Rv 2
2006	smart	21.9304	-100.1	30	1000	46	Rv 2
2007	smart	21.9292	-100.097	30	1000	37	Rv 2
2008	smart	21.9304	-100.094	30	1000	55	Rv 2
2009	smart	21.9354	-100.102	30	1000	49	Rv 2
2010	smart	21.9366	-100.098	30	1000	57	Rv 2
2011	smart	21.9357	-100.094	30	1000	44	Rv 2
2012	smart	21.9385	-100.092	30	1000	43	Rv 2
2013	smart	21.9427	-100.104	30	1000	49	Rv 2
2014	smart	21.9418	-100.1	30	1000	47	Rv 2
2015	smart	21.9413	-100.095	30	1000	39	Rv 2
2016	smart	21.9416	-100.091	30	1000	48	Rv 2
2017	smart	21.9477	-100.103	30	1000	47	Rv 2
2018	smart	21.9467	-100.099	30	1000	51	Rv 2
2019	smart	21.9461	-100.095	30	1000	23	Rv 2
2020	smart	21.9455	-100.092	30	1000	42	Rv 2
2021	smart	21.9528	-100.105	30	1000	51	Rv 2
2022	smart	21.9546	-100.101	30	1000	25	Rv 2
2023	smart	21.9515	-100.098	30	1000	26	Rv 2
2024	smart	21.9529	-100.092	30	1000	36	Rv 2
2001	smart	21.9249	-100.102	31	500	62	Rv 2
2002	smart	21.9245	-100.099	31	500	45	Rv 2
2003	smart	21.9247	-100.096	31	500	58	Rv 2
2004	smart	21.9256	-100.093	31	500	52	Rv 2
2005	smart	21.93	-100.103	31	500	62	Rv 2
2006	smart	21.9304	-100.1	31	500	68	Rv 2
2007	smart	21.9292	-100.097	31	500	64	Rv 2
2008	smart	21.9304	-100.094	31	500	46	Rv 2
2009	smart	21.9354	-100.102	31	500	0	Rv 2
2010	smart	21.9366	-100.098	31	500	52	Rv 2
2011	smart	21.9357	-100.094	31	500	45	Rv 2
2012	smart	21.9385	-100.092	31	500	56	Rv 2
2013	smart	21.9427	-100.104	31	500	50	Rv 2
2014	smart	21.9418	-100.1	31	500	61	Rv 2
2015	smart	21.9413	-100.095	31	500	66	Rv 2
2016	smart	21.9416	-100.091	31	500	69	Rv 2
2017	smart	21.9477	-100.103	31	500	68	Rv 2
2018	smart	21.9467	-100.099	31	500	64	Rv 2
2019	smart	21.9461	-100.095	31	500	91	Rv 2
2020	smart	21.9455	-100.092	31	500	52	Rv 2
2021	smart	21.9528	-100.105	31	500	45	Rv 2
2022	smart	21.9546	-100.101	31	500	67	Rv 2
2023	smart	21.9515	-100.098	31	500	71	Rv 2
2024	smart	21.9529	-100.092	31	500	38	Rv 2
2001	smart	21.9249	-100.102	32	500	55	Rv 2
2002	smart	21.9245	-100.099	32	500	39	Rv 2
2003	smart	21.9247	-100.096	32	500	61	Rv 2
2004	smart	21.9256	-100.093	32	500	74	Rv 2
2005	smart	21.93	-100.103	32	500	50	Rv 2
2006	smart	21.9304	-100.1	32	500	39	Rv 2
2007	smart	21.9292	-100.097	32	500	35	Rv 2
2008	smart	21.9304	-100.094	32	500	38	Rv 2
2009	smart	21.9354	-100.102	32	500	51	Rv 2
2010	smart	21.9366	-100.098	32	500	38	Rv 2
2011	smart	21.9357	-100.094	32	500	28	Rv 2
2012	smart	21.9385	-100.092	32	500	58	Rv 2
2013	smart	21.9427	-100.104	32	500	53	Rv 2
2014	smart	21.9418	-100.1	32	500	54	Rv 2
2015	smart	21.9413	-100.095	32	500	37	Rv 2
2016	smart	21.9416	-100.091	32	500	35	Rv 2
2017	smart	21.9477	-100.103	32	500	35	Rv 2
2018	smart	21.9467	-100.099	32	500	39	Rv 2
2019	smart	21.9461	-100.095	32	500	44	Rv 2
2020	smart	21.9455	-100.092	32	500	46	Rv 2
2021	smart	21.9528	-100.105	32	500	72	Rv 2
2022	smart	21.9546	-100.101	32	500	81	Rv 2
2023	smart	21.9515	-100.098	32	500	0	Rv 2
2024	smart	21.9529	-100.092	32	500	65	Rv 2
2001	smart	21.9249	-100.102	33	500	23	Rv 2
2002	smart	21.9245	-100.099	33	500	36	Rv 2
2003	smart	21.9247	-100.096	33	500	28	Rv 2
2004	smart	21.9256	-100.093	33	500	37	Rv 2
2005	smart	21.93	-100.103	33	500	36	Rv 2
2006	smart	21.9304	-100.1	33	500	34	Rv 2
2007	smart	21.9292	-100.097	33	500	38	Rv 2
2008	smart	21.9304	-100.094	33	500	29	Rv 2
2009	smart	21.9354	-100.102	33	500	45	Rv 2
2010	smart	21.9366	-100.098	33	500	26	Rv 2
2011	smart	21.9357	-100.094	33	500	31	Rv 2
2012	smart	21.9385	-100.092	33	500	39	Rv 2
2013	smart	21.9427	-100.104	33	500	28	Rv 2
2014	smart	21.9418	-100.1	33	500	36	Rv 2
2015	smart	21.9413	-100.095	33	500	39	Rv 2
2016	smart	21.9416	-100.091	33	500	36	Rv 2
2017	smart	21.9477	-100.103	33	500	26	Rv 2
2018	smart	21.9467	-100.099	33	500	25	Rv 2
2019	smart	21.9461	-100.095	33	500	37	Rv 2
2020	smart	21.9455	-100.092	33	500	39	Rv 2
2021	smart	21.9528	-100.105	33	500	47	Rv 2
2022	smart	21.9546	-100.101	33	500	16	Rv 2
2023	smart	21.9515	-100.098	33	500	34	Rv 2
2024	smart	21.9529	-100.092	33	500	23	Rv 2
2001	smart	21.9249	-100.102	34	500	0	Rv 2
2002	smart	21.9245	-100.099	34	500	45	Rv 2
2003	smart	21.9247	-100.096	34	500	29	Rv 2
2004	smart	21.9256	-100.093	34	500	33	Rv 2
2005	smart	21.93	-100.103	34	500	35	Rv 2
2006	smart	21.9304	-100.1	34	500	35	Rv 2
2007	smart	21.9292	-100.097	34	500	38	Rv 2
2008	smart	21.9304	-100.094	34	500	34	Rv 2
2009	smart	21.9354	-100.102	34	500	30	Rv 2
2010	smart	21.9366	-100.098	34	500	39	Rv 2
2011	smart	21.9357	-100.094	34	500	33	Rv 2
2012	smart	21.9385	-100.092	34	500	47	Rv 2
2013	smart	21.9427	-100.104	34	500	57	Rv 2
2014	smart	21.9418	-100.1	34	500	46	Rv 2
2015	smart	21.9413	-100.095	34	500	45	Rv 2
2016	smart	21.9416	-100.091	34	500	32	Rv 2
2017	smart	21.9477	-100.103	34	500	37	Rv 2
2018	smart	21.9467	-100.099	34	500	30	Rv 2
2019	smart	21.9461	-100.095	34	500	29	Rv 2
2020	smart	21.9455	-100.092	34	500	22	Rv 2
2021	smart	21.9528	-100.105	34	500	47	Rv 2
2022	smart	21.9546	-100.101	34	500	29	Rv 2
2023	smart	21.9515	-100.098	34	500	18	Rv 2
2024	smart	21.9529	-100.092	34	500	45	Rv 2
2001	smart	21.9249	-100.102	35	500	22	Rv 2
2002	smart	21.9245	-100.099	35	500	15	Rv 2
2003	smart	21.9247	-100.096	35	500	19	Rv 2
2004	smart	21.9256	-100.093	35	500	24	Rv 2
2005	smart	21.93	-100.103	35	500	27	Rv 2
2006	smart	21.9304	-100.1	35	500	28	Rv 2
2007	smart	21.9292	-100.097	35	500	24	Rv 2
2008	smart	21.9304	-100.094	35	500	28	Rv 2
2009	smart	21.9354	-100.102	35	500	15	Rv 2
2010	smart	21.9366	-100.098	35	500	11	Rv 2
2011	smart	21.9357	-100.094	35	500	9	Rv 2
2012	smart	21.9385	-100.092	35	500	18	Rv 2
2013	smart	21.9427	-100.104	35	500	0	Rv 2
[truncated: 107 more rows]

## Sheet: C.capitata_per_trap
id	lat	long	arbre	polygon	week	type	n
MSO2230	15.2003	-92.6021	MANGO	M1X	21	srlm	32
MSO2229	15.2032	-92.5986	MANGO	M1X	21	srlm	36
MSO10224	15.1727	-92.6421	MANGO	M1X	21	srlm	33
MSO37748	15.1789	-92.6195	MANGO	M1X	21	srlm	30
MSO640	15.1486	-92.6182	MANGO	M1X	21	srlm	29
MSO2267	15.1863	-92.5944	MANGO	M1X	21	srlm	38
MSO2272	15.1728	-92.6041	MANGO	M1X	21	srlm	35
MSO2241	15.1647	-92.6299	MANGO	M1X	21	srlm	37
MSO608	15.1469	-92.6282	MANGO	M1X	21	srlm	36
MSO2243	15.1591	-92.6349	MANGO	M1X	21	srlm	33
MSO2244	15.1574	-92.6391	MANGO	M1X	21	srlm	35
MSO2242	15.1609	-92.6316	MANGO	M1X	21	srlm	36
MSO2232	15.1924	-92.6121	MANGO	M1X	21	srlm	37
MSO2231	15.1957	-92.6082	MANGO	M1X	21	srlm	30
MSO2239	15.1732	-92.6232	MANGO	M1X	21	srlm	25
MSO2236	15.1876	-92.6148	MANGO	M1X	21	srlm	40
MSO2240	15.1688	-92.627	MANGO	M1X	21	srlm	41
MSO2265	15.1947	-92.5887	MANGO	M1X	21	srlm	35
MSO2266	15.1906	-92.5927	MANGO	M1X	21	srlm	25
MSO2269	15.1824	-92.5965	MANGO	M1X	21	srlm	34
MSO2271	15.1784	-92.6002	MANGO	M1X	21	srlm	35
MSO2275	15.1677	-92.6103	MANGO	M1X	21	srlm	38
MSO2278	15.1531	-92.6175	NARANJA	M1X	21	srlm	39
MSO605	15.1492	-92.622	MANGO	M1X	21	srlm	44
MSO607	15.1559	-92.6273	MANGO	M1X	21	srlm	41
MSO2276	15.1632	-92.6136	MANGO	M1X	21	srlm	24
MSO2277	15.1591	-92.6149	GUAYABA	M1X	21	srlm	48
MSO10225	15.1739	-92.6326	MANGO	M1X	21	srlm	45
MSO15223	15.1981	-92.6203	MANGO	M1X	21	srlm	34
MSO15224	15.1885	-92.6218	MANGO	M1X	21	srlm	33
MSO15225	15.1815	-92.6332	MANGO	M1X	21	srlm	25
MSO15226	15.163	-92.6469	MANGO	M1X	21	srlm	44
MSO15227	15.1628	-92.6221	MANGO	M1X	21	srlm	35
MSO15228	15.1753	-92.6117	MANGO	M1X	21	srlm	38
MSO15229	15.1884	-92.606	MANGO	M1X	21	srlm	35
MSO2230	15.2003	-92.6021	MANGO	M1X	22	srlm	8
MSO2229	15.2032	-92.5986	MANGO	M1X	22	srlm	10
MSO10224	15.1727	-92.6421	MANGO	M1X	22	srlm	12
MSO37748	15.1789	-92.6195	MANGO	M1X	22	srlm	7
MSO640	15.1486	-92.6182	MANGO	M1X	22	srlm	12
MSO2267	15.1863	-92.5944	MANGO	M1X	22	srlm	6
MSO2272	15.1728	-92.6041	MANGO	M1X	22	srlm	5
MSO2241	15.1647	-92.6299	MANGO	M1X	22	srlm	14
MSO608	15.1469	-92.6282	MANGO	M1X	22	srlm	2
MSO2243	15.1591	-92.6349	MANGO	M1X	22	srlm	8
MSO2244	15.1574	-92.6391	MANGO	M1X	22	srlm	14
MSO2242	15.1609	-92.6316	MANGO	M1X	22	srlm	6
MSO2232	15.1924	-92.6121	MANGO	M1X	22	srlm	2
MSO2231	15.1957	-92.6082	MANGO	M1X	22	srlm	7
MSO2239	15.1732	-92.6232	MANGO	M1X	22	srlm	3
MSO2236	15.1876	-92.6148	MANGO	M1X	22	srlm	8
MSO2240	15.1688	-92.627	MANGO	M1X	22	srlm	15
MSO2265	15.1947	-92.5887	MANGO	M1X	22	srlm	8
MSO2266	15.1906	-92.5927	MANGO	M1X	22	srlm	7
MSO2269	15.1824	-92.5965	MANGO	M1X	22	srlm	9
MSO2271	15.1784	-92.6002	MANGO	M1X	22	srlm	12
MSO2275	15.1677	-92.6103	MANGO	M1X	22	srlm	3
MSO2278	15.1531	-92.6175	NARANJA	M1X	22	srlm	0
MSO605	15.1492	-92.622	MANGO	M1X	22	srlm	4
MSO607	15.1559	-92.6273	MANGO	M1X	22	srlm	7
MSO2276	15.1632	-92.6136	MANGO	M1X	22	srlm	8
MSO2277	15.1591	-92.6149	GUAYABA	M1X	22	srlm	9
MSO10225	15.1739	-92.6326	MANGO	M1X	22	srlm	14
MSO15223	15.1981	-92.6203	MANGO	M1X	22	srlm	9
MSO15224	15.1885	-92.6218	MANGO	M1X	22	srlm	12
MSO15225	15.1815	-92.6332	MANGO	M1X	22	srlm	17
MSO15226	15.163	-92.6469	MANGO	M1X	22	srlm	15
MSO15227	15.1628	-92.6221	MANGO	M1X	22	srlm	12
MSO15228	15.1753	-92.6117	MANGO	M1X	22	srlm	11
MSO15229	15.1884	-92.606	MANGO	M1X	22	srlm	9
MSO2230	15.2003	-92.6021	MANGO	M1X	23	srlm	18
MSO2229	15.2032	-92.5986	MANGO	M1X	23	srlm	13
MSO10224	15.1727	-92.6421	MANGO	M1X	23	srlm	16
MSO37748	15.1789	-92.6195	MANGO	M1X	23	srlm	9
MSO640	15.1486	-92.6182	MANGO	M1X	23	srlm	15
MSO2267	15.1863	-92.5944	MANGO	M1X	23	srlm	12
MSO2272	15.1728	-92.6041	MANGO	M1X	23	srlm	16
MSO2241	15.1647	-92.6299	MANGO	M1X	23	srlm	16
MSO608	15.1469	-92.6282	MANGO	M1X	23	srlm	5
MSO2243	15.1591	-92.6349	MANGO	M1X	23	srlm	10
MSO2244	15.1574	-92.6391	MANGO	M1X	23	srlm	20
MSO2242	15.1609	-92.6316	MANGO	M1X	23	srlm	7
MSO2232	15.1924	-92.6121	MANGO	M1X	23	srlm	11
MSO2231	15.1957	-92.6082	MANGO	M1X	23	srlm	14
MSO2239	15.1732	-92.6232	MANGO	M1X	23	srlm	16
MSO2236	15.1876	-92.6148	MANGO	M1X	23	srlm	8
MSO2240	15.1688	-92.627	MANGO	M1X	23	srlm	9
MSO2265	15.1947	-92.5887	MANGO	M1X	23	srlm	14
MSO2266	15.1906	-92.5927	MANGO	M1X	23	srlm	16
MSO2269	15.1824	-92.5965	MANGO	M1X	23	srlm	18
MSO2271	15.1784	-92.6002	MANGO	M1X	23	srlm	14
MSO2275	15.1677	-92.6103	MANGO	M1X	23	srlm	11
MSO2278	15.1531	-92.6175	NARANJA	M1X	23	srlm	16
MSO605	15.1492	-92.622	MANGO	M1X	23	srlm	14
MSO607	15.1559	-92.6273	MANGO	M1X	23	srlm	10
MSO2276	15.1632	-92.6136	MANGO	M1X	23	srlm	7
MSO2277	15.1591	-92.6149	GUAYABA	M1X	23	srlm	16
MSO10225	15.1739	-92.6326	MANGO	M1X	23	srlm	12
MSO15223	15.1981	-92.6203	MANGO	M1X	23	srlm	8
MSO15224	15.1885	-92.6218	MANGO	M1X	23	srlm	14
MSO15225	15.1815	-92.6332	MANGO	M1X	23	srlm	17
MSO15226	15.163	-92.6469	MANGO	M1X	23	srlm	12
MSO15227	15.1628	-92.6221	MANGO	M1X	23	srlm	10
MSO15228	15.1753	-92.6117	MANGO	M1X	23	srlm	8
MSO15229	15.1884	-92.606	MANGO	M1X	23	srlm	18
MSO2230	15.2003	-92.6021	MANGO	M1X	24	srlm	12
MSO2229	15.2032	-92.5986	MANGO	M1X	24	srlm	9
MSO10224	15.1727	-92.6421	MANGO	M1X	24	srlm	6
MSO37748	15.1789	-92.6195	MANGO	M1X	24	srlm	2
MSO640	15.1486	-92.6182	MANGO	M1X	24	srlm	11
MSO2267	15.1863	-92.5944	MANGO	M1X	24	srlm	6
MSO2272	15.1728	-92.6041	MANGO	M1X	24	srlm	14
MSO2241	15.1647	-92.6299	MANGO	M1X	24	srlm	5
MSO608	15.1469	-92.6282	MANGO	M1X	24	srlm	8
MSO2243	15.1591	-92.6349	MANGO	M1X	24	srlm	12
MSO2244	15.1574	-92.6391	MANGO	M1X	24	srlm	14
MSO2242	15.1609	-92.6316	MANGO	M1X	24	srlm	12
MSO2232	15.1924	-92.6121	MANGO	M1X	24	srlm	18
MSO2231	15.1957	-92.6082	MANGO	M1X	24	srlm	3
MSO2239	15.1732	-92.6232	MANGO	M1X	24	srlm	12
MSO2236	15.1876	-92.6148	MANGO	M1X	24	srlm	10
MSO2240	15.1688	-92.627	MANGO	M1X	24	srlm	3
MSO2265	15.1947	-92.5887	MANGO	M1X	24	srlm	9
MSO2266	15.1906	-92.5927	MANGO	M1X	24	srlm	2
MSO2269	15.1824	-92.5965	MANGO	M1X	24	srlm	12
MSO2271	15.1784	-92.6002	MANGO	M1X	24	srlm	6
MSO2275	15.1677	-92.6103	MANGO	M1X	24	srlm	16
MSO2278	15.1531	-92.6175	NARANJA	M1X	24	srlm	11
MSO605	15.1492	-92.622	MANGO	M1X	24	srlm	8
MSO607	15.1559	-92.6273	MANGO	M1X	24	srlm	12
MSO2276	15.1632	-92.6136	MANGO	M1X	24	srlm	7
MSO2277	15.1591	-92.6149	GUAYABA	M1X	24	srlm	12
MSO10225	15.1739	-92.6326	MANGO	M1X	24	srlm	10
MSO15223	15.1981	-92.6203	MANGO	M1X	24	srlm	3
MSO15224	15.1885	-92.6218	MANGO	M1X	24	srlm	11
MSO15225	15.1815	-92.6332	MANGO	M1X	24	srlm	9
MSO15226	15.163	-92.6469	MANGO	M1X	24	srlm	14
MSO15227	15.1628	-92.6221	MANGO	M1X	24	srlm	11
MSO15228	15.1753	-92.6117	MANGO	M1X	24	srlm	12
MSO15229	15.1884	-92.606	MANGO	M1X	24	srlm	10
MSO2230	15.2003	-92.6021	MANGO	M1X	25	srlm	2
MSO2229	15.2032	-92.5986	MANGO	M1X	25	srlm	3
MSO10224	15.1727	-92.6421	MANGO	M1X	25	srlm	2
MSO37748	15.1789	-92.6195	MANGO	M1X	25	srlm	4
MSO640	15.1486	-92.6182	MANGO	M1X	25	srlm	2
MSO2267	15.1863	-92.5944	MANGO	M1X	25	srlm	3
MSO2272	15.1728	-92.6041	MANGO	M1X	25	srlm	2
MSO2241	15.1647	-92.6299	MANGO	M1X	25	srlm	1
MSO608	15.1469	-92.6282	MANGO	M1X	25	srlm	3
MSO2243	15.1591	-92.6349	MANGO	M1X	25	srlm	2
MSO2244	15.1574	-92.6391	MANGO	M1X	25	srlm	6
MSO2242	15.1609	-92.6316	MANGO	M1X	25	srlm	1
MSO2232	15.1924	-92.6121	MANGO	M1X	25	srlm	3
MSO2231	15.1957	-92.6082	MANGO	M1X	25	srlm	3
MSO2239	15.1732	-92.6232	MANGO	M1X	25	srlm	2
MSO2236	15.1876	-92.6148	MANGO	M1X	25	srlm	3
MSO2240	15.1688	-92.627	MANGO	M1X	25	srlm	1
MSO2265	15.1947	-92.5887	MANGO	M1X	25	srlm	2
MSO2266	15.1906	-92.5927	MANGO	M1X	25	srlm	2
MSO2269	15.1824	-92.5965	MANGO	M1X	25	srlm	3
MSO2271	15.1784	-92.6002	MANGO	M1X	25	srlm	2
MSO2275	15.1677	-92.6103	MANGO	M1X	25	srlm	2
MSO2278	15.1531	-92.6175	NARANJA	M1X	25	srlm	2
MSO605	15.1492	-92.622	MANGO	M1X	25	srlm	3
MSO607	15.1559	-92.6273	MANGO	M1X	25	srlm	4
MSO2276	15.1632	-92.6136	MANGO	M1X	25	srlm	2
MSO2277	15.1591	-92.6149	GUAYABA	M1X	25	srlm	2
MSO10225	15.1739	-92.6326	MANGO	M1X	25	srlm	3
MSO15223	15.1981	-92.6203	MANGO	M1X	25	srlm	1
MSO15224	15.1885	-92.6218	MANGO	M1X	25	srlm	2
MSO15225	15.1815	-92.6332	MANGO	M1X	25	srlm	1
MSO15226	15.163	-92.6469	MANGO	M1X	25	srlm	3
MSO15227	15.1628	-92.6221	MANGO	M1X	25	srlm	3
MSO15228	15.1753	-92.6117	MANGO	M1X	25	srlm	2
MSO15229	15.1884	-92.606	MANGO	M1X	25	srlm	2
MSO2230	15.2003	-92.6021	MANGO	M1X	26	srlm	21
MSO2229	15.2032	-92.5986	MANGO	M1X	26	srlm	26
MSO10224	15.1727	-92.6421	MANGO	M1X	26	srlm	24
MSO37748	15.1789	-92.6195	MANGO	M1X	26	srlm	16
MSO640	15.1486	-92.6182	MANGO	M1X	26	srlm	15
MSO2267	15.1863	-92.5944	MANGO	M1X	26	srlm	22
MSO2272	15.1728	-92.6041	MANGO	M1X	26	srlm	16
MSO2241	15.1647	-92.6299	MANGO	M1X	26	srlm	21
MSO608	15.1469	-92.6282	MANGO	M1X	26	srlm	18
MSO2243	15.1591	-92.6349	MANGO	M1X	26	srlm	15
MSO2244	15.1574	-92.6391	MANGO	M1X	26	srlm	19
MSO2242	15.1609	-92.6316	MANGO	M1X	26	srlm	17
MSO2232	15.1924	-92.6121	MANGO	M1X	26	srlm	16
MSO2231	15.1957	-92.6082	MANGO	M1X	26	srlm	25
MSO2239	15.1732	-92.6232	MANGO	M1X	26	srlm	16
MSO2236	15.1876	-92.6148	MANGO	M1X	26	srlm	19
MSO2240	15.1688	-92.627	MANGO	M1X	26	srlm	24
MSO2265	15.1947	-92.5887	MANGO	M1X	26	srlm	18
MSO2266	15.1906	-92.5927	MANGO	M1X	26	srlm	16
MSO2269	15.1824	-92.5965	MANGO	M1X	26	srlm	20
MSO2271	15.1784	-92.6002	MANGO	M1X	26	srlm	15
MSO2275	15.1677	-92.6103	MANGO	M1X	26	srlm	14
MSO2278	15.1531	-92.6175	NARANJA	M1X	26	srlm	18
MSO605	15.1492	-92.622	MANGO	M1X	26	srlm	20
MSO607	15.1559	-92.6273	MANGO	M1X	26	srlm	18
MSO2276	15.1632	-92.6136	MANGO	M1X	26	srlm	0
MSO2277	15.1591	-92.6149	GUAYABA	M1X	26	srlm	17
MSO10225	15.1739	-92.6326	MANGO	M1X	26	srlm	15
MSO15223	15.1981	-92.6203	MANGO	M1X	26	srlm	14
MSO15224	15.1885	-92.6218	MANGO	M1X	26	srlm	19
MSO15225	15.1815	-92.6332	MANGO	M1X	26	srlm	15
MSO15226	15.163	-92.6469	MANGO	M1X	26	srlm	16
MSO15227	15.1628	-92.6221	MANGO	M1X	26	srlm	17
MSO15228	15.1753	-92.6117	MANGO	M1X	26	srlm	18
MSO15229	15.1884	-92.606	MANGO	M1X	26	srlm	17
MSO2230	15.2003	-92.6021	MANGO	M1X	27	srlm	22
MSO2229	15.2032	-92.5986	MANGO	M1X	27	srlm	19
MSO10224	15.1727	-92.6421	MANGO	M1X	27	srlm	28
MSO37748	15.1789	-92.6195	MANGO	M1X	27	srlm	25
MSO640	15.1486	-92.6182	MANGO	M1X	27	srlm	38
MSO2267	15.1863	-92.5944	MANGO	M1X	27	srlm	29
MSO2272	15.1728	-92.6041	MANGO	M1X	27	srlm	31
MSO2241	15.1647	-92.6299	MANGO	M1X	27	srlm	22
MSO608	15.1469	-92.6282	MANGO	M1X	27	srlm	25
MSO2243	15.1591	-92.6349	MANGO	M1X	27	srlm	24
MSO2244	15.1574	-92.6391	MANGO	M1X	27	srlm	29
MSO2242	15.1609	-92.6316	MANGO	M1X	27	srlm	18
MSO2232	15.1924	-92.6121	MANGO	M1X	27	srlm	27
MSO2231	15.1957	-92.6082	MANGO	M1X	27	srlm	24
MSO2239	15.1732	-92.6232	MANGO	M1X	27	srlm	22
MSO2236	15.1876	-92.6148	MANGO	M1X	27	srlm	25
MSO2240	15.1688	-92.627	MANGO	M1X	27	srlm	0
MSO2265	15.1947	-92.5887	MANGO	M1X	27	srlm	31
MSO2266	15.1906	-92.5927	MANGO	M1X	27	srlm	26
MSO2269	15.1824	-92.5965	MANGO	M1X	27	srlm	30
MSO2271	15.1784	-92.6002	MANGO	M1X	27	srlm	32
MSO2275	15.1677	-92.6103	MANGO	M1X	27	srlm	37
MSO2278	15.1531	-92.6175	NARANJA	M1X	27	srlm	28
MSO605	15.1492	-92.622	MANGO	M1X	27	srlm	24
MSO607	15.1559	-92.6273	MANGO	M1X	27	srlm	25
MSO2276	15.1632	-92.6136	MANGO	M1X	27	srlm	26
MSO2277	15.1591	-92.6149	GUAYABA	M1X	27	srlm	28
MSO10225	15.1739	-92.6326	MANGO	M1X	27	srlm	27
MSO15223	15.1981	-92.6203	MANGO	M1X	27	srlm	22
MSO15224	15.1885	-92.6218	MANGO	M1X	27	srlm	32
MSO15225	15.1815	-92.6332	MANGO	M1X	27	srlm	28
MSO15226	15.163	-92.6469	MANGO	M1X	27	srlm	25
MSO15227	15.1628	-92.6221	MANGO	M1X	27	srlm	24
MSO15228	15.1753	-92.6117	MANGO	M1X	27	srlm	26
MSO15229	15.1884	-92.606	MANGO	M1X	27	srlm	25
MSO2230	15.2003	-92.6021	MANGO	M1X	28	srlm	54
MSO2229	15.2032	-92.5986	MANGO	M1X	28	srlm	65
MSO10224	15.1727	-92.6421	MANGO	M1X	28	srlm	74
MSO37748	15.1789	-92.6195	MANGO	M1X	28	srlm	56
MSO640	15.1486	-92.6182	MANGO	M1X	28	srlm	85
MSO2267	15.1863	-92.5944	MANGO	M1X	28	srlm	75
MSO2272	15.1728	-92.6041	MANGO	M1X	28	srlm	64
MSO2241	15.1647	-92.6299	MANGO	M1X	28	srlm	56
MSO608	15.1469	-92.6282	MANGO	M1X	28	srlm	54
MSO2243	15.1591	-92.6349	MANGO	M1X	28	srlm	75
MSO2244	15.1574	-92.6391	MANGO	M1X	28	srlm	53
MSO2242	15.1609	-92.6316	MANGO	M1X	28	srlm	85
MSO2232	15.1924	-92.6121	MANGO	M1X	28	srlm	75
MSO2231	15.1957	-92.6082	MANGO	M1X	28	srlm	59
MSO2239	15.1732	-92.6232	MANGO	M1X	28	srlm	85
MSO2236	15.1876	-92.6148	MANGO	M1X	28	srlm	45
MSO2240	15.1688	-92.627	MANGO	M1X	28	srlm	20
MSO2265	15.1947	-92.5887	MANGO	M1X	28	srlm	84
MSO2266	15.1906	-92.5927	MANGO	M1X	28	srlm	77
MSO2269	15.1824	-92.5965	MANGO	M1X	28	srlm	64
MSO2271	15.1784	-92.6002	MANGO	M1X	28	srlm	38
MSO2275	15.1677	-92.6103	MANGO	M1X	28	srlm	57
MSO2278	15.1531	-92.6175	NARANJA	M1X	28	srlm	52
MSO605	15.1492	-92.622	MANGO	M1X	28	srlm	55
MSO607	15.1559	-92.6273	MANGO	M1X	28	srlm	38
MSO2276	15.1632	-92.6136	MANGO	M1X	28	srlm	47
MSO2277	15.1591	-92.6149	GUAYABA	M1X	28	srlm	68
MSO10225	15.1739	-92.6326	MANGO	M1X	28	srlm	36
MSO15223	15.1981	-92.6203	MANGO	M1X	28	srlm	79
MSO15224	15.1885	-92.6218	MANGO	M1X	28	srlm	61
MSO15225	15.1815	-92.6332	MANGO	M1X	28	srlm	99
MSO15226	15.163	-92.6469	MANGO	M1X	28	srlm	64
MSO15227	15.1628	-92.6221	MANGO	M1X	28	srlm	49
MSO15228	15.1753	-92.6117	MANGO	M1X	28	srlm	42
MSO15229	15.1884	-92.606	MANGO	M1X	28	srlm	64
MSO2230	15.2003	-92.6021	MANGO	M1X	29	srlm	169
MSO2229	15.2032	-92.5986	MANGO	M1X	29	srlm	114
MSO10224	15.1727	-92.6421	MANGO	M1X	29	srlm	125
MSO37748	15.1789	-92.6195	MANGO	M1X	29	srlm	189
MSO640	15.1486	-92.6182	MANGO	M1X	29	srlm	105
MSO2267	15.1863	-92.5944	MANGO	M1X	29	srlm	101
MSO2272	15.1728	-92.6041	MANGO	M1X	29	srlm	132
MSO2241	15.1647	-92.6299	MANGO	M1X	29	srlm	0
MSO608	15.1469	-92.6282	MANGO	M1X	29	srlm	107
MSO2243	15.1591	-92.6349	MANGO	M1X	29	srlm	132
MSO2244	15.1574	-92.6391	MANGO	M1X	29	srlm	145
MSO2242	15.1609	-92.6316	MANGO	M1X	29	srlm	124
MSO2232	15.1924	-92.6121	MANGO	M1X	29	srlm	136
MSO2231	15.1957	-92.6082	MANGO	M1X	29	srlm	54
MSO2239	15.1732	-92.6232	MANGO	M1X	29	srlm	117
MSO2236	15.1876	-92.6148	MANGO	M1X	29	srlm	98
MSO2240	15.1688	-92.627	MANGO	M1X	29	srlm	87
MSO2265	15.1947	-92.5887	MANGO	M1X	29	srlm	125
MSO2266	15.1906	-92.5927	MANGO	M1X	29	srlm	116
MSO2269	15.1824	-92.5965	MANGO	M1X	29	srlm	125
MSO2271	15.1784	-92.6002	MANGO	M1X	29	srlm	103
MSO2275	15.1677	-92.6103	MANGO	M1X	29	srlm	110
MSO2278	15.1531	-92.6175	NARANJA	M1X	29	srlm	82
MSO605	15.1492	-92.622	MANGO	M1X	29	srlm	107
MSO607	15.1559	-92.6273	MANGO	M1X	29	srlm	0
MSO2276	15.1632	-92.6136	MANGO	M1X	29	srlm	121
MSO2277	15.1591	-92.6149	GUAYABA	M1X	29	srlm	188
MSO10225	15.1739	-92.6326	MANGO	M1X	29	srlm	78
MSO15223	15.1981	-92.6203	MANGO	M1X	29	srlm	99
MSO15224	15.1885	-92.6218	MANGO	M1X	29	srlm	78
MSO15225	15.1815	-92.6332	MANGO	M1X	29	srlm	89
MSO15226	15.163	-92.6469	MANGO	M1X	29	srlm	104
MSO15227	15.1628	-92.6221	MANGO	M1X	29	srlm	0
MSO15228	15.1753	-92.6117	MANGO	M1X	29	srlm	110
MSO15229	15.1884	-92.606	MANGO	M1X	29	srlm	81
MSO2230	15.2003	-92.6021	MANGO	M1X	30	srlm	69
MSO2229	15.2032	-92.5986	MANGO	M1X	30	srlm	52
MSO10224	15.1727	-92.6421	MANGO	M1X	30	srlm	54
MSO37748	15.1789	-92.6195	MANGO	M1X	30	srlm	48
MSO640	15.1486	-92.6182	MANGO	M1X	30	srlm	36
MSO2267	15.1863	-92.5944	MANGO	M1X	30	srlm	51
MSO2272	15.1728	-92.6041	MANGO	M1X	30	srlm	56
MSO2241	15.1647	-92.6299	MANGO	M1X	30	srlm	69
MSO608	15.1469	-92.6282	MANGO	M1X	30	srlm	51
MSO2243	15.1591	-92.6349	MANGO	M1X	30	srlm	47
MSO2244	15.1574	-92.6391	MANGO	M1X	30	srlm	26
MSO2242	15.1609	-92.6316	MANGO	M1X	30	srlm	64
MSO2232	15.1924	-92.6121	MANGO	M1X	30	srlm	75
MSO2231	15.1957	-92.6082	MANGO	M1X	30	srlm	87
MSO2239	15.1732	-92.6232	MANGO	M1X	30	srlm	38
MSO2236	15.1876	-92.6148	MANGO	M1X	30	srlm	66
MSO2240	15.1688	-92.627	MANGO	M1X	30	srlm	61
MSO2265	15.1947	-92.5887	MANGO	M1X	30	srlm	72
MSO2266	15.1906	-92.5927	MANGO	M1X	30	srlm	54
MSO2269	15.1824	-92.5965	MANGO	M1X	30	srlm	36
MSO2271	15.1784	-92.6002	MANGO	M1X	30	srlm	49
MSO2275	15.1677	-92.6103	MANGO	M1X	30	srlm	57
MSO2278	15.1531	-92.6175	NARANJA	M1X	30	srlm	0
MSO605	15.1492	-92.622	MANGO	M1X	30	srlm	54
MSO607	15.1559	-92.6273	MANGO	M1X	30	srlm	48
MSO2276	15.1632	-92.6136	MANGO	M1X	30	srlm	67
MSO2277	15.1591	-92.6149	GUAYABA	M1X	30	srlm	46
MSO10225	15.1739	-92.6326	MANGO	M1X	30	srlm	52
MSO15223	15.1981	-92.6203	MANGO	M1X	30	srlm	51
MSO15224	15.1885	-92.6218	MANGO	M1X	30	srlm	0
MSO15225	15.1815	-92.6332	MANGO	M1X	30	srlm	64
MSO15226	15.163	-92.6469	MANGO	M1X	30	srlm	60
MSO15227	15.1628	-92.6221	MANGO	M1X	30	srlm	48
MSO15228	15.1753	-92.6117	MANGO	M1X	30	srlm	54
MSO15229	15.1884	-92.606	MANGO	M1X	30	srlm	61
MSO2230	15.2003	-92.6021	MANGO	M1X	31	srlm	121
MSO2229	15.2032	-92.5986	MANGO	M1X	31	srlm	106
MSO10224	15.1727	-92.6421	MANGO	M1X	31	srlm	112
MSO37748	15.1789	-92.6195	MANGO	M1X	31	srlm	105
MSO640	15.1486	-92.6182	MANGO	M1X	31	srlm	98
MSO2267	15.1863	-92.5944	MANGO	M1X	31	srlm	124
MSO2272	15.1728	-92.6041	MANGO	M1X	31	srlm	102
MSO2241	15.1647	-92.6299	MANGO	M1X	31	srlm	111
MSO608	15.1469	-92.6282	MANGO	M1X	31	srlm	98
MSO2243	15.1591	-92.6349	MANGO	M1X	31	srlm	125
MSO2244	15.1574	-92.6391	MANGO	M1X	31	srlm	97
MSO2242	15.1609	-92.6316	MANGO	M1X	31	srlm	114
MSO2232	15.1924	-92.6121	MANGO	M1X	31	srlm	105
MSO2231	15.1957	-92.6082	MANGO	M1X	31	srlm	105
MSO2239	15.1732	-92.6232	MANGO	M1X	31	srlm	96
MSO2236	15.1876	-92.6148	MANGO	M1X	31	srlm	114
MSO2240	15.1688	-92.627	MANGO	M1X	31	srlm	105
MSO2265	15.1947	-92.5887	MANGO	M1X	31	srlm	79
MSO2266	15.1906	-92.5927	MANGO	M1X	31	srlm	115
MSO2269	15.1824	-92.5965	MANGO	M1X	31	srlm	99
MSO2271	15.1784	-92.6002	MANGO	M1X	31	srlm	94
MSO2275	15.1677	-92.6103	MANGO	M1X	31	srlm	110
MSO2278	15.1531	-92.6175	NARANJA	M1X	31	srlm	92
MSO605	15.1492	-92.622	MANGO	M1X	31	srlm	85
MSO607	15.1559	-92.6273	MANGO	M1X	31	srlm	131
MSO2276	15.1632	-92.6136	MANGO	M1X	31	srlm	104
MSO2277	15.1591	-92.6149	GUAYABA	M1X	31	srlm	99
MSO10225	15.1739	-92.6326	MANGO	M1X	31	srlm	115
MSO15223	15.1981	-92.6203	MANGO	M1X	31	srlm	120
MSO15224	15.1885	-92.6218	MANGO	M1X	31	srlm	102
MSO15225	15.1815	-92.6332	MANGO	M1X	31	srlm	104
MSO15226	15.163	-92.6469	MANGO	M1X	31	srlm	87
MSO15227	15.1628	-92.6221	MANGO	M1X	31	srlm	106
MSO15228	15.1753	-92.6117	MANGO	M1X	31	srlm	99
MSO15229	15.1884	-92.606	MANGO	M1X	31	srlm	75
MSO2230	15.2003	-92.6021	MANGO	M1X	32	srlm	62
MSO2229	15.2032	-92.5986	MANGO	M1X	32	srlm	48
MSO10224	15.1727	-92.6421	MANGO	M1X	32	srlm	39
MSO37748	15.1789	-92.6195	MANGO	M1X	32	srlm	54
MSO640	15.1486	-92.6182	MANGO	M1X	32	srlm	51
MSO2267	15.1863	-92.5944	MANGO	M1X	32	srlm	55
MSO2272	15.1728	-92.6041	MANGO	M1X	32	srlm	52
MSO2241	15.1647	-92.6299	MANGO	M1X	32	srlm	46
MSO608	15.1469	-92.6282	MANGO	M1X	32	srlm	58
MSO2243	15.1591	-92.6349	MANGO	M1X	32	srlm	0
MSO2244	15.1574	-92.6391	MANGO	M1X	32	srlm	54
MSO2242	15.1609	-92.6316	MANGO	M1X	32	srlm	68
MSO2232	15.1924	-92.6121	MANGO	M1X	32	srlm	62
MSO2231	15.1957	-92.6082	MANGO	M1X	32	srlm	48
MSO2239	15.1732	-92.6232	MANGO	M1X	32	srlm	47
MSO2236	15.1876	-92.6148	MANGO	M1X	32	srlm	59
MSO2240	15.1688	-92.627	MANGO	M1X	32	srlm	57
MSO2265	15.1947	-92.5887	MANGO	M1X	32	srlm	51
MSO2266	15.1906	-92.5927	MANGO	M1X	32	srlm	53
MSO2269	15.1824	-92.5965	MANGO	M1X	32	srlm	59
MSO2271	15.1784	-92.6002	MANGO	M1X	32	srlm	54
MSO2275	15.1677	-92.6103	MANGO	M1X	32	srlm	50
MSO2278	15.1531	-92.6175	NARANJA	M1X	32	srlm	49
MSO605	15.1492	-92.622	MANGO	M1X	32	srlm	45
MSO607	15.1559	-92.6273	MANGO	M1X	32	srlm	51
MSO2276	15.1632	-92.6136	MANGO	M1X	32	srlm	51
MSO2277	15.1591	-92.6149	GUAYABA	M1X	32	srlm	0
MSO10225	15.1739	-92.6326	MANGO	M1X	32	srlm	50
MSO15223	15.1981	-92.6203	MANGO	M1X	32	srlm	48
MSO15224	15.1885	-92.6218	MANGO	M1X	32	srlm	49
MSO15225	15.1815	-92.6332	MANGO	M1X	32	srlm	54
MSO15226	15.163	-92.6469	MANGO	M1X	32	srlm	65
MSO15227	15.1628	-92.6221	MANGO	M1X	32	srlm	55
MSO15228	15.1753	-92.6117	MANGO	M1X	32	srlm	54
MSO15229	15.1884	-92.606	MANGO	M1X	32	srlm	62
MSO2230	15.2003	-92.6021	MANGO	M1X	33	srlm	87
MSO2229	15.2032	-92.5986	MANGO	M1X	33	srlm	78
MSO10224	15.1727	-92.6421	MANGO	M1X	33	srlm	92
MSO37748	15.1789	-92.6195	MANGO	M1X	33	srlm	78
MSO640	15.1486	-92.6182	MANGO	M1X	33	srlm	68
MSO2267	15.1863	-92.5944	MANGO	M1X	33	srlm	77
MSO2272	15.1728	-92.6041	MANGO	M1X	33	srlm	81
MSO2241	15.1647	-92.6299	MANGO	M1X	33	srlm	95
MSO608	15.1469	-92.6282	MANGO	M1X	33	srlm	78
MSO2243	15.1591	-92.6349	MANGO	M1X	33	srlm	0
MSO2244	15.1574	-92.6391	MANGO	M1X	33	srlm	69
MSO2242	15.1609	-92.6316	MANGO	M1X	33	srlm	97
MSO2232	15.1924	-92.6121	MANGO	M1X	33	srlm	81
MSO2231	15.1957	-92.6082	MANGO	M1X	33	srlm	87
MSO2239	15.1732	-92.6232	MANGO	M1X	33	srlm	91
MSO2236	15.1876	-92.6148	MANGO	M1X	33	srlm	91
MSO2240	15.1688	-92.627	MANGO	M1X	33	srlm	99
MSO2265	15.1947	-92.5887	MANGO	M1X	33	srlm	54
MSO2266	15.1906	-92.5927	MANGO	M1X	33	srlm	82
MSO2269	15.1824	-92.5965	MANGO	M1X	33	srlm	69
MSO2271	15.1784	-92.6002	MANGO	M1X	33	srlm	99
MSO2275	15.1677	-92.6103	MANGO	M1X	33	srlm	91
MSO2278	15.1531	-92.6175	NARANJA	M1X	33	srlm	86
MSO605	15.1492	-92.622	MANGO	M1X	33	srlm	76
MSO607	15.1559	-92.6273	MANGO	M1X	33	srlm	77
MSO2276	15.1632	-92.6136	MANGO	M1X	33	srlm	75
MSO2277	15.1591	-92.6149	GUAYABA	M1X	33	srlm	0
MSO10225	15.1739	-92.6326	MANGO	M1X	33	srlm	108
MSO15223	15.1981	-92.6203	MANGO	M1X	33	srlm	94
MSO15224	15.1885	-92.6218	MANGO	M1X	33	srlm	81
MSO15225	15.1815	-92.6332	MANGO	M1X	33	srlm	0
MSO15226	15.163	-92.6469	MANGO	M1X	33	srlm	99
MSO15227	15.1628	-92.6221	MANGO	M1X	33	srlm	68
MSO15228	15.1753	-92.6117	MANGO	M1X	33	srlm	87
MSO15229	15.1884	-92.606	MANGO	M1X	33	srlm	106
MSO2230	15.2003	-92.6021	MANGO	M1X	34	srlm	77
MSO2229	15.2032	-92.5986	MANGO	M1X	34	srlm	64
MSO10224	15.1727	-92.6421	MANGO	M1X	34	srlm	76
MSO37748	15.1789	-92.6195	MANGO	M1X	34	srlm	65
MSO640	15.1486	-92.6182	MANGO	M1X	34	srlm	79
MSO2267	15.1863	-92.5944	MANGO	M1X	34	srlm	61
MSO2272	15.1728	-92.6041	MANGO	M1X	34	srlm	71
MSO2241	15.1647	-92.6299	MANGO	M1X	34	srlm	64
MSO608	15.1469	-92.6282	MANGO	M1X	34	srlm	73
MSO2243	15.1591	-92.6349	MANGO	M1X	34	srlm	51
MSO2244	15.1574	-92.6391	MANGO	M1X	34	srlm	70
MSO2242	15.1609	-92.6316	MANGO	M1X	34	srlm	0
MSO2232	15.1924	-92.6121	MANGO	M1X	34	srlm	71
MSO2231	15.1957	-92.6082	MANGO	M1X	34	srlm	70
MSO2239	15.1732	-92.6232	MANGO	M1X	34	srlm	82
MSO2236	15.1876	-92.6148	MANGO	M1X	34	srlm	77
MSO2240	15.1688	-92.627	MANGO	M1X	34	srlm	71
MSO2265	15.1947	-92.5887	MANGO	M1X	34	srlm	74
MSO2266	15.1906	-92.5927	MANGO	M1X	34	srlm	59
MSO2269	15.1824	-92.5965	MANGO	M1X	34	srlm	72
MSO2271	15.1784	-92.6002	MANGO	M1X	34	srlm	115
MSO2275	15.1677	-92.6103	MANGO	M1X	34	srlm	50
MSO2278	15.1531	-92.6175	NARANJA	M1X	34	srlm	71
MSO605	15.1492	-92.622	MANGO	M1X	34	srlm	104
MSO607	15.1559	-92.6273	MANGO	M1X	34	srlm	64
MSO2276	15.1632	-92.6136	MANGO	M1X	34	srlm	66
MSO2277	15.1591	-92.6149	GUAYABA	M1X	34	srlm	0
MSO10225	15.1739	-92.6326	MANGO	M1X	34	srlm	69
MSO15223	15.1981	-92.6203	MANGO	M1X	34	srlm	68
MSO15224	15.1885	-92.6218	MANGO	M1X	34	srlm	84
MSO15225	15.1815	-92.6332	MANGO	M1X	34	srlm	115
MSO15226	15.163	-92.6469	MANGO	M1X	34	srlm	75
MSO15227	15.1628	-92.6221	MANGO	M1X	34	srlm	87
MSO15228	15.1753	-92.6117	MANGO	M1X	34	srlm	74
MSO15229	15.1884	-92.606	MANGO	M1X	34	srlm	101
MSO2230	15.2003	-92.6021	MANGO	M1X	35	srlm	71
MSO2229	15.2032	-92.5986	MANGO	M1X	35	srlm	57
MSO10224	15.1727	-92.6421	MANGO	M1X	35	srlm	82
MSO37748	15.1789	-92.6195	MANGO	M1X	35	srlm	64
MSO640	15.1486	-92.6182	MANGO	M1X	35	srlm	87
MSO2267	15.1863	-92.5944	MANGO	M1X	35	srlm	99
MSO2272	15.1728	-92.6041	MANGO	M1X	35	srlm	74
MSO2241	15.1647	-92.6299	MANGO	M1X	35	srlm	0
MSO608	15.1469	-92.6282	MANGO	M1X	35	srlm	88
MSO2243	15.1591	-92.6349	MANGO	M1X	35	srlm	67
MSO2244	15.1574	-92.6391	MANGO	M1X	35	srlm	78
MSO2242	15.1609	-92.6316	MANGO	M1X	35	srlm	65
MSO2232	15.1924	-92.6121	MANGO	M1X	35	srlm	65
MSO2231	15.1957	-92.6082	MANGO	M1X	35	srlm	45
MSO2239	15.1732	-92.6232	MANGO	M1X	35	srlm	85
MSO2236	15.1876	-92.6148	MANGO	M1X	35	srlm	41
MSO2240	15.1688	-92.627	MANGO	M1X	35	srlm	57
MSO2265	15.1947	-92.5887	MANGO	M1X	35	srlm	77
MSO2266	15.1906	-92.5927	MANGO	M1X	35	srlm	58
MSO2269	15.1824	-92.5965	MANGO	M1X	35	srlm	56
MSO2271	15.1784	-92.6002	MANGO	M1X	35	srlm	70
MSO2275	15.1677	-92.6103	MANGO	M1X	35	srlm	48
MSO2278	15.1531	-92.6175	NARANJA	M1X	35	srlm	74
MSO605	15.1492	-92.622	MANGO	M1X	35	srlm	66
MSO607	15.1559	-92.6273	MANGO	M1X	35	srlm	61
MSO2276	15.1632	-92.6136	MANGO	M1X	35	srlm	0
MSO2277	15.1591	-92.6149	GUAYABA	M1X	35	srlm	66
MSO10225	15.1739	-92.6326	MANGO	M1X	35	srlm	58
MSO15223	15.1981	-92.6203	MANGO	M1X	35	srlm	45
MSO15224	15.1885	-92.6218	MANGO	M1X	35	srlm	55
MSO15225	15.1815	-92.6332	MANGO	M1X	35	srlm	64
MSO15226	15.163	-92.6469	MANGO	M1X	35	srlm	77
MSO15227	15.1628	-92.6221	MANGO	M1X	35	srlm	0
MSO15228	15.1753	-92.6117	MANGO	M1X	35	srlm	47
MSO15229	15.1884	-92.606	MANGO	M1X	35	srlm	56
MSO2230	15.2003	-92.6021	MANGO	M1X	36	srlm	51
MSO2229	15.2032	-92.5986	MANGO	M1X	36	srlm	47
MSO10224	15.1727	-92.6421	MANGO	M1X	36	srlm	39
MSO37748	15.1789	-92.6195	MANGO	M1X	36	srlm	38
MSO640	15.1486	-92.6182	MANGO	M1X	36	srlm	55
MSO2267	15.1863	-92.5944	MANGO	M1X	36	srlm	65
MSO2272	15.1728	-92.6041	MANGO	M1X	36	srlm	42
MSO2241	15.1647	-92.6299	MANGO	M1X	36	srlm	51
MSO608	15.1469	-92.6282	MANGO	M1X	36	srlm	45
MSO2243	15.1591	-92.6349	MANGO	M1X	36	srlm	39
MSO2244	15.1574	-92.6391	MANGO	M1X	36	srlm	46
MSO2242	15.1609	-92.6316	MANGO	M1X	36	srlm	38
MSO2232	15.1924	-92.6121	MANGO	M1X	36	srlm	42
MSO2231	15.1957	-92.6082	MANGO	M1X	36	srlm	57
MSO2239	15.1732	-92.6232	MANGO	M1X	36	srlm	58
MSO2236	15.1876	-92.6148	MANGO	M1X	36	srlm	63
MSO2240	15.1688	-92.627	MANGO	M1X	36	srlm	34
MSO2265	15.1947	-92.5887	MANGO	M1X	36	srlm	43
MSO2266	15.1906	-92.5927	MANGO	M1X	36	srlm	49
MSO2269	15.1824	-92.5965	MANGO	M1X	36	srlm	42
MSO2271	15.1784	-92.6002	MANGO	M1X	36	srlm	55
MSO2275	15.1677	-92.6103	MANGO	M1X	36	srlm	71
MSO2278	15.1531	-92.6175	NARANJA	M1X	36	srlm	55
MSO605	15.1492	-92.622	MANGO	M1X	36	srlm	34
MSO607	15.1559	-92.6273	MANGO	M1X	36	srlm	39
MSO2276	15.1632	-92.6136	MANGO	M1X	36	srlm	55
MSO2277	15.1591	-92.6149	GUAYABA	M1X	36	srlm	54
MSO10225	15.1739	-92.6326	MANGO	M1X	36	srlm	41
MSO15223	15.1981	-92.6203	MANGO	M1X	36	srlm	36
MSO15224	15.1885	-92.6218	MANGO	M1X	36	srlm	43
MSO15225	15.1815	-92.6332	MANGO	M1X	36	srlm	35
MSO15226	15.163	-92.6469	MANGO	M1X	36	srlm	42
MSO15227	15.1628	-92.6221	MANGO	M1X	36	srlm	46
MSO15228	15.1753	-92.6117	MANGO	M1X	36	srlm	58
MSO15229	15.1884	-92.606	MANGO	M1X	36	srlm	46
MSO2230	15.2003	-92.6021	MANGO	M1X	37	srlm	44
MSO2229	15.2032	-92.5986	MANGO	M1X	37	srlm	38
MSO10224	15.1727	-92.6421	MANGO	M1X	37	srlm	62
MSO37748	15.1789	-92.6195	MANGO	M1X	37	srlm	33
MSO640	15.1486	-92.6182	MANGO	M1X	37	srlm	45
MSO2267	15.1863	-92.5944	MANGO	M1X	37	srlm	32
MSO2272	15.1728	-92.6041	MANGO	M1X	37	srlm	36
MSO2241	15.1647	-92.6299	MANGO	M1X	37	srlm	37
MSO608	15.1469	-92.6282	MANGO	M1X	37	srlm	40
MSO2243	15.1591	-92.6349	MANGO	M1X	37	srlm	36
MSO2244	15.1574	-92.6391	MANGO	M1X	37	srlm	35
MSO2242	15.1609	-92.6316	MANGO	M1X	37	srlm	44
MSO2232	15.1924	-92.6121	MANGO	M1X	37	srlm	50
MSO2231	15.1957	-92.6082	MANGO	M1X	37	srlm	0
MSO2239	15.1732	-92.6232	MANGO	M1X	37	srlm	44
MSO2236	15.1876	-92.6148	MANGO	M1X	37	srlm	38
MSO2240	15.1688	-92.627	MANGO	M1X	37	srlm	54
MSO2265	15.1947	-92.5887	MANGO	M1X	37	srlm	62
MSO2266	15.1906	-92.5927	MANGO	M1X	37	srlm	32
MSO2269	15.1824	-92.5965	MANGO	M1X	37	srlm	44
MSO2271	15.1784	-92.6002	MANGO	M1X	37	srlm	51
MSO2275	15.1677	-92.6103	MANGO	M1X	37	srlm	22
MSO2278	15.1531	-92.6175	NARANJA	M1X	37	srlm	65
MSO605	15.1492	-92.622	MANGO	M1X	37	srlm	33
MSO607	15.1559	-92.6273	MANGO	M1X	37	srlm	36
MSO2276	15.1632	-92.6136	MANGO	M1X	37	srlm	52
MSO2277	15.1591	-92.6149	GUAYABA	M1X	37	srlm	44
MSO10225	15.1739	-92.6326	MANGO	M1X	37	srlm	29
MSO15223	15.1981	-92.6203	MANGO	M1X	37	srlm	30
MSO15224	15.1885	-92.6218	MANGO	M1X	37	srlm	29
MSO15225	15.1815	-92.6332	MANGO	M1X	37	srlm	22
MSO15226	15.163	-92.6469	MANGO	M1X	37	srlm	45
MSO15227	15.1628	-92.6221	MANGO	M1X	37	srlm	30
MSO15228	15.1753	-92.6117	MANGO	M1X	37	srlm	38
MSO15229	15.1884	-92.606	MANGO	M1X	37	srlm	40
MSO2230	15.2003	-92.6021	MANGO	M1X	38	srlm	32
MSO2229	15.2032	-92.5986	MANGO	M1X	38	srlm	0
MSO10224	15.1727	-92.6421	MANGO	M1X	38	srlm	35
MSO37748	15.1789	-92.6195	MANGO	M1X	38	srlm	21
MSO640	15.1486	-92.6182	MANGO	M1X	38	srlm	44
MSO2267	15.1863	-92.5944	MANGO	M1X	38	srlm	29
MSO2272	15.1728	-92.6041	MANGO	M1X	38	srlm	28
MSO2241	15.1647	-92.6299	MANGO	M1X	38	srlm	19
MSO608	15.1469	-92.6282	MANGO	M1X	38	srlm	44
MSO2243	15.1591	-92.6349	MANGO	M1X	38	srlm	38
MSO2244	15.1574	-92.6391	MANGO	M1X	38	srlm	0
MSO2242	15.1609	-92.6316	MANGO	M1X	38	srlm	21
MSO2232	15.1924	-92.6121	MANGO	M1X	38	srlm	30
MSO2231	15.1957	-92.6082	MANGO	M1X	38	srlm	28
MSO2239	15.1732	-92.6232	MANGO	M1X	38	srlm	24
MSO2236	15.1876	-92.6148	MANGO	M1X	38	srlm	16
MSO2240	15.1688	-92.627	MANGO	M1X	38	srlm	34
MSO2265	15.1947	-92.5887	MANGO	M1X	38	srlm	22
MSO2266	15.1906	-92.5927	MANGO	M1X	38	srlm	21
MSO2269	15.1824	-92.5965	MANGO	M1X	38	srlm	35
MSO2271	15.1784	-92.6002	MANGO	M1X	38	srlm	16
MSO2275	15.1677	-92.6103	MANGO	M1X	38	srlm	44
MSO2278	15.1531	-92.6175	NARANJA	M1X	38	srlm	46
MSO605	15.1492	-92.622	MANGO	M1X	38	srlm	38
MSO607	15.1559	-92.6273	MANGO	M1X	38	srlm	29
MSO2276	15.1632	-92.6136	MANGO	M1X	38	srlm	33
MSO2277	15.1591	-92.6149	GUAYABA	M1X	38	srlm	24
MSO10225	15.1739	-92.6326	MANGO	M1X	38	srlm	48
MSO15223	15.1981	-92.6203	MANGO	M1X	38	srlm	42
MSO15224	15.1885	-92.6218	MANGO	M1X	38	srlm	46
MSO15225	15.1815	-92.6332	MANGO	M1X	38	srlm	24
MSO15226	15.163	-92.6469	MANGO	M1X	38	srlm	17
MSO15227	15.1628	-92.6221	MANGO	M1X	38	srlm	29
MSO15228	15.1753	-92.6117	MANGO	M1X	38	srlm	25
MSO15229	15.1884	-92.606	MANGO	M1X	38	srlm	16
MSO2230	15.2003	-92.6021	MANGO	M1X	39	srlm	61
MSO2229	15.2032	-92.5986	MANGO	M1X	39	srlm	67
MSO10224	15.1727	-92.6421	MANGO	M1X	39	srlm	51
MSO37748	15.1789	-92.6195	MANGO	M1X	39	srlm	49
MSO640	15.1486	-92.6182	MANGO	M1X	39	srlm	71
MSO2267	15.1863	-92.5944	MANGO	M1X	39	srlm	55
MSO2272	15.1728	-92.6041	MANGO	M1X	39	srlm	42
MSO2241	15.1647	-92.6299	MANGO	M1X	39	srlm	48
MSO608	15.1469	-92.6282	MANGO	M1X	39	srlm	66
MSO2243	15.1591	-92.6349	MANGO	M1X	39	srlm	48
MSO2244	15.1574	-92.6391	MANGO	M1X	39	srlm	49
MSO2242	15.1609	-92.6316	MANGO	M1X	39	srlm	51
MSO2232	15.1924	-92.6121	MANGO	M1X	39	srlm	66
MSO2231	15.1957	-92.6082	MANGO	M1X	39	srlm	60
MSO2239	15.1732	-92.6232	MANGO	M1X	39	srlm	74
MSO2236	15.1876	-92.6148	MANGO	M1X	39	srlm	44
MSO2240	15.1688	-92.627	MANGO	M1X	39	srlm	51
MSO2265	15.1947	-92.5887	MANGO	M1X	39	srlm	56
MSO2266	15.1906	-92.5927	MANGO	M1X	39	srlm	55
MSO2269	15.1824	-92.5965	MANGO	M1X	39	srlm	66
MSO2271	15.1784	-92.6002	MANGO	M1X	39	srlm	45
MSO2275	15.1677	-92.6103	MANGO	M1X	39	srlm	0
MSO2278	15.1531	-92.6175	NARANJA	M1X	39	srlm	66
MSO605	15.1492	-92.622	MANGO	M1X	39	srlm	54
MSO607	15.1559	-92.6273	MANGO	M1X	39	srlm	66
MSO2276	15.1632	-92.6136	MANGO	M1X	39	srlm	0
MSO2277	15.1591	-92.6149	GUAYABA	M1X	39	srlm	0
MSO10225	15.1739	-92.6326	MANGO	M1X	39	srlm	74
MSO15223	15.1981	-92.6203	MANGO	M1X	39	srlm	49
MSO15224	15.1885	-92.6218	MANGO	M1X	39	srlm	55
MSO15225	15.1815	-92.6332	MANGO	M1X	39	srlm	70
MSO15226	15.163	-92.6469	MANGO	M1X	39	srlm	41
MSO15227	15.1628	-92.6221	MANGO	M1X	39	srlm	75
MSO15228	15.1753	-92.6117	MANGO	M1X	39	srlm	66
MSO15229	15.1884	-92.606	MANGO	M1X	39	srlm	74
MSO2230	15.2003	-92.6021	MANGO	M1X	40	srlm	29
MSO2229	15.2032	-92.5986	MANGO	M1X	40	srlm	33
MSO10224	15.1727	-92.6421	MANGO	M1X	40	srlm	31
MSO37748	15.1789	-92.6195	MANGO	M1X	40	srlm	54
MSO640	15.1486	-92.6182	MANGO	M1X	40	srlm	21
MSO2267	15.1863	-92.5944	MANGO	M1X	40	srlm	24
MSO2272	15.1728	-92.6041	MANGO	M1X	40	srlm	29
MSO2241	15.1647	-92.6299	MANGO	M1X	40	srlm	43
MSO608	15.1469	-92.6282	MANGO	M1X	40	srlm	42
MSO2243	15.1591	-92.6349	MANGO	M1X	40	srlm	41
MSO2244	15.1574	-92.6391	MANGO	M1X	40	srlm	29
MSO2242	15.1609	-92.6316	MANGO	M1X	40	srlm	33
MSO2232	15.1924	-92.6121	MANGO	M1X	40	srlm	21
MSO2231	15.1957	-92.6082	MANGO	M1X	40	srlm	0
MSO2239	15.1732	-92.6232	MANGO	M1X	40	srlm	16
MSO2236	15.1876	-92.6148	MANGO	M1X	40	srlm	33
MSO2240	15.1688	-92.627	MANGO	M1X	40	srlm	42
MSO2265	15.1947	-92.5887	MANGO	M1X	40	srlm	42
MSO2266	15.1906	-92.5927	MANGO	M1X	40	srlm	47
MSO2269	15.1824	-92.5965	MANGO	M1X	40	srlm	32
MSO2271	15.1784	-92.6002	MANGO	M1X	40	srlm	31
MSO2275	15.1677	-92.6103	MANGO	M1X	40	srlm	30
MSO2278	15.1531	-92.6175	NARANJA	M1X	40	srlm	28
MSO605	15.1492	-92.622	MANGO	M1X	40	srlm	34
MSO607	15.1559	-92.6273	MANGO	M1X	40	srlm	42
MSO2276	15.1632	-92.6136	MANGO	M1X	40	srlm	39
MSO2277	15.1591	-92.6149	GUAYABA	M1X	40	srlm	25
MSO10225	15.1739	-92.6326	MANGO	M1X	40	srlm	22
MSO15223	15.1981	-92.6203	MANGO	M1X	40	srlm	0
MSO15224	15.1885	-92.6218	MANGO	M1X	40	srlm	19
MSO15225	15.1815	-92.6332	MANGO	M1X	40	srlm	0
MSO15226	15.163	-92.6469	MANGO	M1X	40	srlm	34
MSO15227	15.1628	-92.6221	MANGO	M1X	40	srlm	43
MSO15228	15.1753	-92.6117	MANGO	M1X	40	srlm	34
MSO15229	15.1884	-92.606	MANGO	M1X	40	srlm	31
MSO9944	15.4136	-92.8921	MANGO	M1W	21	crlm	43
MSO9943	15.4045	-92.8937	MANGO	M1W	21	crlm	39
MSO8312	15.4112	-92.8857	MANGO	M1W	21	crlm	0
MSO8329	15.3972	-92.8976	MANGO	M1W	21	crlm	0
MSO8330	15.3892	-92.9037	MANGO	M1W	21	crlm	0
MSO8340	15.4282	-92.9085	MANGO	M1W	21	crlm	0
MSO8344	15.3965	-92.9201	MANGO	M1W	21	crlm	34
MSO8341	15.4245	-92.9136	MANGO	M1W	21	crlm	55
MSO8342	15.3867	-92.9191	MANGO	M1W	21	crlm	45
MSO8343	15.4075	-92.9215	MANGO	M1W	21	crlm	52
MSO8346	15.3784	-92.9243	MANGO	M1W	21	crlm	55
MSO8345	15.3867	-92.9212	MANGO	M1W	21	crlm	24
MSO8347	15.3677	-92.9318	MANGO	M1W	21	crlm	30
MSO15230	15.4259	-92.905	OTROS	M1W	21	crlm	55
MSO15231	15.4216	-92.9081	MANGO	M1W	21	crlm	24
MSO15232	15.4137	-92.9077	MANGO	M1W	21	crlm	30
MSO15233	15.4098	-92.9058	CAIMITO	M1W	21	crlm	47
MSO15234	15.404	-92.9057	MANGO	M1W	21	crlm	44
MSO15235	15.3983	-92.909	MANGO	M1W	21	crlm	52
MSO15238	15.3774	-92.9146	MANGO	M1W	21	crlm	0
MSO15239	15.3719	-92.9289	NARANJA	M1W	21	crlm	56
MSO15240	15.3794	-92.9301	OTROS	M1W	21	crlm	74
MSO15241	15.3805	-92.9535	OTROS	M1W	21	crlm	80
MSO15242	15.381	-92.9424	OTROS	M1W	21	crlm	55
MSO15243	15.3816	-92.948	OTROS	M1W	21	crlm	52
MSO15244	15.3789	-92.9535	MANGO	M1W	21	crlm	56
MSO15245	15.3972	-92.9268	OTROS	M1W	21	crlm	98
MSO15246	15.3978	-92.9312	OTROS	M1W	21	crlm	87
MSO15247	15.3983	-92.9357	OTROS	M1W	21	crlm	94
MSO15248	15.4034	-92.9209	OTROS	M1W	21	crlm	75
MSO15249	15.3916	-92.9317	MANGO	M1W	21	crlm	61
MSO15250	15.3867	-92.9437	MANGO	M1W	21	crlm	51
MSO15251	15.3658	-92.9279	MANGO	M1W	21	crlm	52
MSO9944	15.4136	-92.8921	MANGO	M1W	22	crlm	22
MSO9943	15.4045	-92.8937	MANGO	M1W	22	crlm	21
MSO8312	15.4112	-92.8857	MANGO	M1W	22	crlm	24
MSO8329	15.3972	-92.8976	MANGO	M1W	22	crlm	18
MSO8330	15.3892	-92.9037	MANGO	M1W	22	crlm	13
MSO8340	15.4282	-92.9085	MANGO	M1W	22	crlm	12
MSO8344	15.3965	-92.9201	MANGO	M1W	22	crlm	7
MSO8341	15.4245	-92.9136	MANGO	M1W	22	crlm	17
MSO8342	15.3867	-92.9191	MANGO	M1W	22	crlm	4
MSO8343	15.4075	-92.9215	MANGO	M1W	22	crlm	15
MSO8346	15.3784	-92.9243	MANGO	M1W	22	crlm	16
MSO8345	15.3867	-92.9212	MANGO	M1W	22	crlm	1
MSO8347	15.3677	-92.9318	MANGO	M1W	22	crlm	8
MSO15230	15.4259	-92.905	OTROS	M1W	22	crlm	16
MSO15231	15.4216	-92.9081	MANGO	M1W	22	crlm	24
MSO15232	15.4137	-92.9077	MANGO	M1W	22	crlm	15
MSO15233	15.4098	-92.9058	CAIMITO	M1W	22	crlm	10
MSO15234	15.404	-92.9057	MANGO	M1W	22	crlm	24
MSO15235	15.3983	-92.909	MANGO	M1W	22	crlm	24
MSO15238	15.3774	-92.9146	MANGO	M1W	22	crlm	12
MSO15239	15.3719	-92.9289	NARANJA	M1W	22	crlm	25
MSO15240	15.3794	-92.9301	OTROS	M1W	22	crlm	35
MSO15241	15.3805	-92.9535	OTROS	M1W	22	crlm	21
MSO15242	15.381	-92.9424	OTROS	M1W	22	crlm	18
MSO15243	15.3816	-92.948	OTROS	M1W	22	crlm	8
MSO15244	15.3789	-92.9535	MANGO	M1W	22	crlm	0
MSO15245	15.3972	-92.9268	OTROS	M1W	22	crlm	31
MSO15246	15.3978	-92.9312	OTROS	M1W	22	crlm	22
MSO15247	15.3983	-92.9357	OTROS	M1W	22	crlm	29
MSO15248	15.4034	-92.9209	OTROS	M1W	22	crlm	28
MSO15249	15.3916	-92.9317	MANGO	M1W	22	crlm	28
MSO15250	15.3867	-92.9437	MANGO	M1W	22	crlm	32
MSO15251	15.3658	-92.9279	MANGO	M1W	22	crlm	21
MSO9944	15.4136	-92.8921	MANGO	M1W	23	crlm	71
MSO9943	15.4045	-92.8937	MANGO	M1W	23	crlm	65
MSO8312	15.4112	-92.8857	MANGO	M1W	23	crlm	65
MSO8329	15.3972	-92.8976	MANGO	M1W	23	crlm	60
MSO8330	15.3892	-92.9037	MANGO	M1W	23	crlm	59
MSO8340	15.4282	-92.9085	MANGO	M1W	23	crlm	66
MSO8344	15.3965	-92.9201	MANGO	M1W	23	crlm	49
MSO8341	15.4245	-92.9136	MANGO	M1W	23	crlm	51
MSO8342	15.3867	-92.9191	MANGO	M1W	23	crlm	60
MSO8343	15.4075	-92.9215	MANGO	M1W	23	crlm	74
MSO8346	15.3784	-92.9243	MANGO	M1W	23	crlm	48
MSO8345	15.3867	-92.9212	MANGO	M1W	23	crlm	59
MSO8347	15.3677	-92.9318	MANGO	M1W	23	crlm	66
MSO15230	15.4259	-92.905	OTROS	M1W	23	crlm	75
MSO15231	15.4216	-92.9081	MANGO	M1W	23	crlm	78
MSO15232	15.4137	-92.9077	MANGO	M1W	23	crlm	55
MSO15233	15.4098	-92.9058	CAIMITO	M1W	23	crlm	75
MSO15234	15.404	-92.9057	MANGO	M1W	23	crlm	56
MSO15235	15.3983	-92.909	MANGO	M1W	23	crlm	66
MSO15238	15.3774	-92.9146	MANGO	M1W	23	crlm	58
MSO15239	15.3719	-92.9289	NARANJA	M1W	23	crlm	72
MSO15240	15.3794	-92.9301	OTROS	M1W	23	crlm	65
MSO15241	15.3805	-92.9535	OTROS	M1W	23	crlm	45
MSO15242	15.381	-92.9424	OTROS	M1W	23	crlm	55
MSO15243	15.3816	-92.948	OTROS	M1W	23	crlm	55
MSO15244	15.3789	-92.9535	MANGO	M1W	23	crlm	47
MSO15245	15.3972	-92.9268	OTROS	M1W	23	crlm	72
MSO15246	15.3978	-92.9312	OTROS	M1W	23	crlm	84
MSO15247	15.3983	-92.9357	OTROS	M1W	23	crlm	56
MSO15248	15.4034	-92.9209	OTROS	M1W	23	crlm	65
MSO15249	15.3916	-92.9317	MANGO	M1W	23	crlm	65
MSO15250	15.3867	-92.9437	MANGO	M1W	23	crlm	64
MSO15251	15.3658	-92.9279	MANGO	M1W	23	crlm	69
MSO9944	15.4136	-92.8921	MANGO	M1W	24	crlm	14
MSO9943	15.4045	-92.8937	MANGO	M1W	24	crlm	12
MSO8312	15.4112	-92.8857	MANGO	M1W	24	crlm	8
MSO8329	15.3972	-92.8976	MANGO	M1W	24	crlm	0
MSO8330	15.3892	-92.9037	MANGO	M1W	24	crlm	13
MSO8340	15.4282	-92.9085	MANGO	M1W	24	crlm	15
MSO8344	15.3965	-92.9201	MANGO	M1W	24	crlm	10
MSO8341	15.4245	-92.9136	MANGO	M1W	24	crlm	11
MSO8342	15.3867	-92.9191	MANGO	M1W	24	crlm	9
MSO8343	15.4075	-92.9215	MANGO	M1W	24	crlm	8
MSO8346	15.3784	-92.9243	MANGO	M1W	24	crlm	16
MSO8345	15.3867	-92.9212	MANGO	M1W	24	crlm	15
MSO8347	15.3677	-92.9318	MANGO	M1W	24	crlm	9
MSO15230	15.4259	-92.905	OTROS	M1W	24	crlm	14
MSO15231	15.4216	-92.9081	MANGO	M1W	24	crlm	6
MSO15232	15.4137	-92.9077	MANGO	M1W	24	crlm	11
MSO15233	15.4098	-92.9058	CAIMITO	M1W	24	crlm	11
MSO15234	15.404	-92.9057	MANGO	M1W	24	crlm	9
MSO15235	15.3983	-92.909	MANGO	M1W	24	crlm	11
MSO15238	15.3774	-92.9146	MANGO	M1W	24	crlm	8
MSO15239	15.3719	-92.9289	NARANJA	M1W	24	crlm	16
MSO15240	15.3794	-92.9301	OTROS	M1W	24	crlm	12
MSO15241	15.3805	-92.9535	OTROS	M1W	24	crlm	8
MSO15242	15.381	-92.9424	OTROS	M1W	24	crlm	16
MSO15243	15.3816	-92.948	OTROS	M1W	24	crlm	13
MSO15244	15.3789	-92.9535	MANGO	M1W	24	crlm	12
MSO15245	15.3972	-92.9268	OTROS	M1W	24	crlm	12
MSO15246	15.3978	-92.9312	OTROS	M1W	24	crlm	13
MSO15247	15.3983	-92.9357	OTROS	M1W	24	crlm	14
MSO15248	15.4034	-92.9209	OTROS	M1W	24	crlm	14
MSO15249	15.3916	-92.9317	MANGO	M1W	24	crlm	12
MSO15250	15.3867	-92.9437	MANGO	M1W	24	crlm	11
MSO15251	15.3658	-92.9279	MANGO	M1W	24	crlm	14
MSO9944	15.4136	-92.8921	MANGO	M1W	25	crlm	12
MSO9943	15.4045	-92.8937	MANGO	M1W	25	crlm	10
MSO8312	15.4112	-92.8857	MANGO	M1W	25	crlm	8
MSO8329	15.3972	-92.8976	MANGO	M1W	25	crlm	7
MSO8330	15.3892	-92.9037	MANGO	M1W	25	crlm	10
MSO8340	15.4282	-92.9085	MANGO	M1W	25	crlm	8
MSO8344	15.3965	-92.9201	MANGO	M1W	25	crlm	16
MSO8341	15.4245	-92.9136	MANGO	M1W	25	crlm	15
MSO8342	15.3867	-92.9191	MANGO	M1W	25	crlm	10
MSO8343	15.4075	-92.9215	MANGO	M1W	25	crlm	9
MSO8346	15.3784	-92.9243	MANGO	M1W	25	crlm	8
MSO8345	15.3867	-92.9212	MANGO	M1W	25	crlm	13
MSO8347	15.3677	-92.9318	MANGO	M1W	25	crlm	14
MSO15230	15.4259	-92.905	OTROS	M1W	25	crlm	9
MSO15231	15.4216	-92.9081	MANGO	M1W	25	crlm	7
MSO15232	15.4137	-92.9077	MANGO	M1W	25	crlm	16
MSO15233	15.4098	-92.9058	CAIMITO	M1W	25	crlm	14
MSO15234	15.404	-92.9057	MANGO	M1W	25	crlm	15
MSO15235	15.3983	-92.909	MANGO	M1W	25	crlm	13
MSO15238	15.3774	-92.9146	MANGO	M1W	25	crlm	12
MSO15239	15.3719	-92.9289	NARANJA	M1W	25	crlm	17
MSO15240	15.3794	-92.9301	OTROS	M1W	25	crlm	5
MSO15241	15.3805	-92.9535	OTROS	M1W	25	crlm	4
MSO15242	15.381	-92.9424	OTROS	M1W	25	crlm	8
MSO15243	15.3816	-92.948	OTROS	M1W	25	crlm	7
MSO15244	15.3789	-92.9535	MANGO	M1W	25	crlm	6
MSO15245	15.3972	-92.9268	OTROS	M1W	25	crlm	14
MSO15246	15.3978	-92.9312	OTROS	M1W	25	crlm	12
MSO15247	15.3983	-92.9357	OTROS	M1W	25	crlm	3
MSO15248	15.4034	-92.9209	OTROS	M1W	25	crlm	16
MSO15249	15.3916	-92.9317	MANGO	M1W	25	crlm	9
MSO15250	15.3867	-92.9437	MANGO	M1W	25	crlm	8
MSO15251	15.3658	-92.9279	MANGO	M1W	25	crlm	10
MSO9944	15.4136	-92.8921	MANGO	M1W	26	crlm	28
MSO9943	15.4045	-92.8937	MANGO	M1W	26	crlm	23
MSO8312	15.4112	-92.8857	MANGO	M1W	26	crlm	24
MSO8329	15.3972	-92.8976	MANGO	M1W	26	crlm	25
MSO8330	15.3892	-92.9037	MANGO	M1W	26	crlm	22
MSO8340	15.4282	-92.9085	MANGO	M1W	26	crlm	18
MSO8344	15.3965	-92.9201	MANGO	M1W	26	crlm	32
MSO8341	15.4245	-92.9136	MANGO	M1W	26	crlm	30
MSO8342	15.3867	-92.9191	MANGO	M1W	26	crlm	29
MSO8343	15.4075	-92.9215	MANGO	M1W	26	crlm	32
MSO8346	15.3784	-92.9243	MANGO	M1W	26	crlm	23
MSO8345	15.3867	-92.9212	MANGO	M1W	26	crlm	16
MSO8347	15.3677	-92.9318	MANGO	M1W	26	crlm	30
MSO15230	15.4259	-92.905	OTROS	M1W	26	crlm	32
MSO15231	15.4216	-92.9081	MANGO	M1W	26	crlm	35
MSO15232	15.4137	-92.9077	MANGO	M1W	26	crlm	36
MSO15233	15.4098	-92.9058	CAIMITO	M1W	26	crlm	18
MSO15234	15.404	-92.9057	MANGO	M1W	26	crlm	25
MSO15235	15.3983	-92.909	MANGO	M1W	26	crlm	27
MSO15238	15.3774	-92.9146	MANGO	M1W	26	crlm	33
MSO15239	15.3719	-92.9289	NARANJA	M1W	26	crlm	24
MSO15240	15.3794	-92.9301	OTROS	M1W	26	crlm	36
MSO15241	15.3805	-92.9535	OTROS	M1W	26	crlm	38
MSO15242	15.381	-92.9424	OTROS	M1W	26	crlm	37
MSO15243	15.3816	-92.948	OTROS	M1W	26	crlm	0
MSO15244	15.3789	-92.9535	MANGO	M1W	26	crlm	47
MSO15245	15.3972	-92.9268	OTROS	M1W	26	crlm	29
MSO15246	15.3978	-92.9312	OTROS	M1W	26	crlm	24
MSO15247	15.3983	-92.9357	OTROS	M1W	26	crlm	18
MSO15248	15.4034	-92.9209	OTROS	M1W	26	crlm	56
MSO15249	15.3916	-92.9317	MANGO	M1W	26	crlm	30
MSO15250	15.3867	-92.9437	MANGO	M1W	26	crlm	28
MSO15251	15.3658	-92.9279	MANGO	M1W	26	crlm	25
MSO9944	15.4136	-92.8921	MANGO	M1W	27	crlm	45
MSO9943	15.4045	-92.8937	MANGO	M1W	27	crlm	51
MSO8312	15.4112	-92.8857	MANGO	M1W	27	crlm	0
MSO8329	15.3972	-92.8976	MANGO	M1W	27	crlm	44
MSO8330	15.3892	-92.9037	MANGO	M1W	27	crlm	38
MSO8340	15.4282	-92.9085	MANGO	M1W	27	crlm	34
MSO8344	15.3965	-92.9201	MANGO	M1W	27	crlm	42
MSO8341	15.4245	-92.9136	MANGO	M1W	27	crlm	48
MSO8342	15.3867	-92.9191	MANGO	M1W	27	crlm	35
MSO8343	15.4075	-92.9215	MANGO	M1W	27	crlm	31
MSO8346	15.3784	-92.9243	MANGO	M1W	27	crlm	39
MSO8345	15.3867	-92.9212	MANGO	M1W	27	crlm	41
MSO8347	15.3677	-92.9318	MANGO	M1W	27	crlm	28
MSO15230	15.4259	-92.905	OTROS	M1W	27	crlm	35
MSO15231	15.4216	-92.9081	MANGO	M1W	27	crlm	44
MSO15232	15.4137	-92.9077	MANGO	M1W	27	crlm	56
MSO15233	15.4098	-92.9058	CAIMITO	M1W	27	crlm	52
MSO15234	15.404	-92.9057	MANGO	M1W	27	crlm	51
MSO15235	15.3983	-92.909	MANGO	M1W	27	crlm	43
MSO15238	15.3774	-92.9146	MANGO	M1W	27	crlm	39
MSO15239	15.3719	-92.9289	NARANJA	M1W	27	crlm	38
MSO15240	15.3794	-92.9301	OTROS	M1W	27	crlm	44
MSO15241	15.3805	-92.9535	OTROS	M1W	27	crlm	45
MSO15242	15.381	-92.9424	OTROS	M1W	27	crlm	48
MSO15243	15.3816	-92.948	OTROS	M1W	27	crlm	44
MSO15244	15.3789	-92.9535	MANGO	M1W	27	crlm	48
MSO15245	15.3972	-92.9268	OTROS	M1W	27	crlm	49
MSO15246	15.3978	-92.9312	OTROS	M1W	27	crlm	55
MSO15247	15.3983	-92.9357	OTROS	M1W	27	crlm	22
MSO15248	15.4034	-92.9209	OTROS	M1W	27	crlm	41
MSO15249	15.3916	-92.9317	MANGO	M1W	27	crlm	37
MSO15250	15.3867	-92.9437	MANGO	M1W	27	crlm	44
MSO15251	15.3658	-92.9279	MANGO	M1W	27	crlm	43
MSO9944	15.4136	-92.8921	MANGO	M1W	28	crlm	75
MSO9943	15.4045	-92.8937	MANGO	M1W	28	crlm	120
MSO8312	15.4112	-92.8857	MANGO	M1W	28	crlm	69
MSO8329	15.3972	-92.8976	MANGO	M1W	28	crlm	68
MSO8330	15.3892	-92.9037	MANGO	M1W	28	crlm	74
MSO8340	15.4282	-92.9085	MANGO	M1W	28	crlm	0
MSO8344	15.3965	-92.9201	MANGO	M1W	28	crlm	88
MSO8341	15.4245	-92.9136	MANGO	M1W	28	crlm	0
MSO8342	15.3867	-92.9191	MANGO	M1W	28	crlm	0
MSO8343	15.4075	-92.9215	MANGO	M1W	28	crlm	74
MSO8346	15.3784	-92.9243	MANGO	M1W	28	crlm	114
MSO8345	15.3867	-92.9212	MANGO	M1W	28	crlm	87
MSO8347	15.3677	-92.9318	MANGO	M1W	28	crlm	124
MSO15230	15.4259	-92.905	OTROS	M1W	28	crlm	45
MSO15231	15.4216	-92.9081	MANGO	M1W	28	crlm	87
MSO15232	15.4137	-92.9077	MANGO	M1W	28	crlm	65
MSO15233	15.4098	-92.9058	CAIMITO	M1W	28	crlm	64
MSO15234	15.404	-92.9057	MANGO	M1W	28	crlm	74
MSO15235	15.3983	-92.909	MANGO	M1W	28	crlm	35
MSO15238	15.3774	-92.9146	MANGO	M1W	28	crlm	65
MSO15239	15.3719	-92.9289	NARANJA	M1W	28	crlm	124
MSO15240	15.3794	-92.9301	OTROS	M1W	28	crlm	64
MSO15241	15.3805	-92.9535	OTROS	M1W	28	crlm	60
MSO15242	15.381	-92.9424	OTROS	M1W	28	crlm	75
MSO15243	15.3816	-92.948	OTROS	M1W	28	crlm	65
MSO15244	15.3789	-92.9535	MANGO	M1W	28	crlm	105
MSO15245	15.3972	-92.9268	OTROS	M1W	28	crlm	85
MSO15246	15.3978	-92.9312	OTROS	M1W	28	crlm	74
MSO15247	15.3983	-92.9357	OTROS	M1W	28	crlm	91
MSO15248	15.4034	-92.9209	OTROS	M1W	28	crlm	96
MSO15249	15.3916	-92.9317	MANGO	M1W	28	crlm	74
MSO15250	15.3867	-92.9437	MANGO	M1W	28	crlm	86
MSO15251	15.3658	-92.9279	MANGO	M1W	28	crlm	74
MSO9944	15.4136	-92.8921	MANGO	M1W	29	crlm	88
MSO9943	15.4045	-92.8937	MANGO	M1W	29	crlm	91
MSO8312	15.4112	-92.8857	MANGO	M1W	29	crlm	68
MSO8329	15.3972	-92.8976	MANGO	M1W	29	crlm	75
MSO8330	15.3892	-92.9037	MANGO	M1W	29	crlm	94
MSO8340	15.4282	-92.9085	MANGO	M1W	29	crlm	86
MSO8344	15.3965	-92.9201	MANGO	M1W	29	crlm	94
MSO8341	15.4245	-92.9136	MANGO	M1W	29	crlm	76
MSO8342	15.3867	-92.9191	MANGO	M1W	29	crlm	65
MSO8343	15.4075	-92.9215	MANGO	M1W	29	crlm	94
MSO8346	15.3784	-92.9243	MANGO	M1W	29	crlm	77
MSO8345	15.3867	-92.9212	MANGO	M1W	29	crlm	87
MSO8347	15.3677	-92.9318	MANGO	M1W	29	crlm	97
MSO15230	15.4259	-92.905	OTROS	M1W	29	crlm	0
MSO15231	15.4216	-92.9081	MANGO	M1W	29	crlm	0
MSO15232	15.4137	-92.9077	MANGO	M1W	29	crlm	94
MSO15233	15.4098	-92.9058	CAIMITO	M1W	29	crlm	99
MSO15234	15.404	-92.9057	MANGO	M1W	29	crlm	87
MSO15235	15.3983	-92.909	MANGO	M1W	29	crlm	105
MSO15238	15.3774	-92.9146	MANGO	M1W	29	crlm	69
MSO15239	15.3719	-92.9289	NARANJA	M1W	29	crlm	68
MSO15240	15.3794	-92.9301	OTROS	M1W	29	crlm	95
MSO15241	15.3805	-92.9535	OTROS	M1W	29	crlm	92
MSO15242	15.381	-92.9424	OTROS	M1W	29	crlm	93
MSO15243	15.3816	-92.948	OTROS	M1W	29	crlm	115
MSO15244	15.3789	-92.9535	MANGO	M1W	29	crlm	88
MSO15245	15.3972	-92.9268	OTROS	M1W	29	crlm	110
MSO15246	15.3978	-92.9312	OTROS	M1W	29	crlm	121
MSO15247	15.3983	-92.9357	OTROS	M1W	29	crlm	105
MSO15248	15.4034	-92.9209	OTROS	M1W	29	crlm	55
MSO15249	15.3916	-92.9317	MANGO	M1W	29	crlm	88
MSO15250	15.3867	-92.9437	MANGO	M1W	29	crlm	77
MSO15251	15.3658	-92.9279	MANGO	M1W	29	crlm	88
MSO9944	15.4136	-92.8921	MANGO	M1W	30	crlm	0
MSO9943	15.4045	-92.8937	MANGO	M1W	30	crlm	101
MSO8312	15.4112	-92.8857	MANGO	M1W	30	crlm	88
MSO8329	15.3972	-92.8976	MANGO	M1W	30	crlm	50
MSO8330	15.3892	-92.9037	MANGO	M1W	30	crlm	115
MSO8340	15.4282	-92.9085	MANGO	M1W	30	crlm	141
MSO8344	15.3965	-92.9201	MANGO	M1W	30	crlm	50
MSO8341	15.4245	-92.9136	MANGO	M1W	30	crlm	56
MSO8342	15.3867	-92.9191	MANGO	M1W	30	crlm	145
MSO8343	15.4075	-92.9215	MANGO	M1W	30	crlm	84
MSO8346	15.3784	-92.9243	MANGO	M1W	30	crlm	168
MSO8345	15.3867	-92.9212	MANGO	M1W	30	crlm	55
MSO8347	15.3677	-92.9318	MANGO	M1W	30	crlm	52
MSO15230	15.4259	-92.905	OTROS	M1W	30	crlm	98
MSO15231	15.4216	-92.9081	MANGO	M1W	30	crlm	147
MSO15232	15.4137	-92.9077	MANGO	M1W	30	crlm	25
MSO15233	15.4098	-92.9058	CAIMITO	M1W	30	crlm	88
MSO15234	15.404	-92.9057	MANGO	M1W	30	crlm	56
MSO15235	15.3983	-92.909	MANGO	M1W	30	crlm	89
MSO15238	15.3774	-92.9146	MANGO	M1W	30	crlm	26
MSO15239	15.3719	-92.9289	NARANJA	M1W	30	crlm	158
MSO15240	15.3794	-92.9301	OTROS	M1W	30	crlm	65
MSO15241	15.3805	-92.9535	OTROS	M1W	30	crlm	145
MSO15242	15.381	-92.9424	OTROS	M1W	30	crlm	155
MSO15243	15.3816	-92.948	OTROS	M1W	30	crlm	165
MSO15244	15.3789	-92.9535	MANGO	M1W	30	crlm	104
MSO15245	15.3972	-92.9268	OTROS	M1W	30	crlm	125
MSO15246	15.3978	-92.9312	OTROS	M1W	30	crlm	80
MSO15247	15.3983	-92.9357	OTROS	M1W	30	crlm	165
MSO15248	15.4034	-92.9209	OTROS	M1W	30	crlm	75
MSO15249	15.3916	-92.9317	MANGO	M1W	30	crlm	120
MSO15250	15.3867	-92.9437	MANGO	M1W	30	crlm	88
MSO15251	15.3658	-92.9279	MANGO	M1W	30	crlm	75
MSO9944	15.4136	-92.8921	MANGO	M1W	31	crlm	107
MSO9943	15.4045	-92.8937	MANGO	M1W	31	crlm	63
MSO8312	15.4112	-92.8857	MANGO	M1W	31	crlm	95
MSO8329	15.3972	-92.8976	MANGO	M1W	31	crlm	50
MSO8330	15.3892	-92.9037	MANGO	M1W	31	crlm	69
MSO8340	15.4282	-92.9085	MANGO	M1W	31	crlm	200
MSO8344	15.3965	-92.9201	MANGO	M1W	31	crlm	185
MSO8341	15.4245	-92.9136	MANGO	M1W	31	crlm	145
MSO8342	15.3867	-92.9191	MANGO	M1W	31	crlm	271
MSO8343	15.4075	-92.9215	MANGO	M1W	31	crlm	182
MSO8346	15.3784	-92.9243	MANGO	M1W	31	crlm	43
MSO8345	15.3867	-92.9212	MANGO	M1W	31	crlm	78
MSO8347	15.3677	-92.9318	MANGO	M1W	31	crlm	99
MSO15230	15.4259	-92.905	OTROS	M1W	31	crlm	85
MSO15231	15.4216	-92.9081	MANGO	M1W	31	crlm	49
MSO15232	15.4137	-92.9077	MANGO	M1W	31	crlm	65
MSO15233	15.4098	-92.9058	CAIMITO	M1W	31	crlm	0
MSO15234	15.404	-92.9057	MANGO	M1W	31	crlm	0
MSO15235	15.3983	-92.909	MANGO	M1W	31	crlm	4
MSO15238	15.3774	-92.9146	MANGO	M1W	31	crlm	158
MSO15239	15.3719	-92.9289	NARANJA	M1W	31	crlm	56
MSO15240	15.3794	-92.9301	OTROS	M1W	31	crlm	0
MSO15241	15.3805	-92.9535	OTROS	M1W	31	crlm	65
MSO15242	15.381	-92.9424	OTROS	M1W	31	crlm	95
MSO15243	15.3816	-92.948	OTROS	M1W	31	crlm	66
MSO15244	15.3789	-92.9535	MANGO	M1W	31	crlm	60
MSO15245	15.3972	-92.9268	OTROS	M1W	31	crlm	185
MSO15246	15.3978	-92.9312	OTROS	M1W	31	crlm	200
MSO15247	15.3983	-92.9357	OTROS	M1W	31	crlm	240
MSO15248	15.4034	-92.9209	OTROS	M1W	31	crlm	160
MSO15249	15.3916	-92.9317	MANGO	M1W	31	crlm	129
MSO15250	15.3867	-92.9437	MANGO	M1W	31	crlm	145
MSO15251	15.3658	-92.9279	MANGO	M1W	31	crlm	101
MSO9944	15.4136	-92.8921	MANGO	M1W	32	crlm	30
MSO9943	15.4045	-92.8937	MANGO	M1W	32	crlm	28
MSO8312	15.4112	-92.8857	MANGO	M1W	32	crlm	158
MSO8329	15.3972	-92.8976	MANGO	M1W	32	crlm	199
MSO8330	15.3892	-92.9037	MANGO	M1W	32	crlm	125
MSO8340	15.4282	-92.9085	MANGO	M1W	32	crlm	16
MSO8344	15.3965	-92.9201	MANGO	M1W	32	crlm	14
MSO8341	15.4245	-92.9136	MANGO	M1W	32	crlm	12
MSO8342	15.3867	-92.9191	MANGO	M1W	32	crlm	17
MSO8343	15.4075	-92.9215	MANGO	M1W	32	crlm	33
MSO8346	15.3784	-92.9243	MANGO	M1W	32	crlm	0
MSO8345	15.3867	-92.9212	MANGO	M1W	32	crlm	22
MSO8347	15.3677	-92.9318	MANGO	M1W	32	crlm	0
MSO15230	15.4259	-92.905	OTROS	M1W	32	crlm	19
MSO15231	15.4216	-92.9081	MANGO	M1W	32	crlm	17
MSO15232	15.4137	-92.9077	MANGO	M1W	32	crlm	35
MSO15233	15.4098	-92.9058	CAIMITO	M1W	32	crlm	24
MSO15234	15.404	-92.9057	MANGO	M1W	32	crlm	46
MSO15235	15.3983	-92.909	MANGO	M1W	32	crlm	50
MSO15238	15.3774	-92.9146	MANGO	M1W	32	crlm	135
MSO15239	15.3719	-92.9289	NARANJA	M1W	32	crlm	21
MSO15240	15.3794	-92.9301	OTROS	M1W	32	crlm	17
MSO15241	15.3805	-92.9535	OTROS	M1W	32	crlm	16
MSO15242	15.381	-92.9424	OTROS	M1W	32	crlm	37
MSO15243	15.3816	-92.948	OTROS	M1W	32	crlm	12
MSO15244	15.3789	-92.9535	MANGO	M1W	32	crlm	6
MSO15245	15.3972	-92.9268	OTROS	M1W	32	crlm	18
MSO15246	15.3978	-92.9312	OTROS	M1W	32	crlm	16
MSO15247	15.3983	-92.9357	OTROS	M1W	32	crlm	40
MSO15248	15.4034	-92.9209	OTROS	M1W	32	crlm	12
MSO15249	15.3916	-92.9317	MANGO	M1W	32	crlm	28
MSO15250	15.3867	-92.9437	MANGO	M1W	32	crlm	23
MSO15251	15.3658	-92.9279	MANGO	M1W	32	crlm	33
MSO9944	15.4136	-92.8921	MANGO	M1W	33	crlm	0
MSO9943	15.4045	-92.8937	MANGO	M1W	33	crlm	0
MSO8312	15.4112	-92.8857	MANGO	M1W	33	crlm	0
MSO8329	15.3972	-92.8976	MANGO	M1W	33	crlm	0
MSO8330	15.3892	-92.9037	MANGO	M1W	33	crlm	0
MSO8340	15.4282	-92.9085	MANGO	M1W	33	crlm	95
MSO8344	15.3965	-92.9201	MANGO	M1W	33	crlm	88
MSO8341	15.4245	-92.9136	MANGO	M1W	33	crlm	248
MSO8342	15.3867	-92.9191	MANGO	M1W	33	crlm	219
MSO8343	15.4075	-92.9215	MANGO	M1W	33	crlm	271
MSO8346	15.3784	-92.9243	MANGO	M1W	33	crlm	87
MSO8345	15.3867	-92.9212	MANGO	M1W	33	crlm	69
MSO8347	15.3677	-92.9318	MANGO	M1W	33	crlm	54
MSO15230	15.4259	-92.905	OTROS	M1W	33	crlm	26
MSO15231	15.4216	-92.9081	MANGO	M1W	33	crlm	88
MSO15232	15.4137	-92.9077	MANGO	M1W	33	crlm	46
MSO15233	15.4098	-92.9058	CAIMITO	M1W	33	crlm	96
MSO15234	15.404	-92.9057	MANGO	M1W	33	crlm	56
MSO15235	15.3983	-92.909	MANGO	M1W	33	crlm	74
MSO15238	15.3774	-92.9146	MANGO	M1W	33	crlm	221
MSO15239	15.3719	-92.9289	NARANJA	M1W	33	crlm	0
MSO15240	15.3794	-92.9301	OTROS	M1W	33	crlm	46
MSO15241	15.3805	-92.9535	OTROS	M1W	33	crlm	71
MSO15242	15.381	-92.9424	OTROS	M1W	33	crlm	99
MSO15243	15.3816	-92.948	OTROS	M1W	33	crlm	45
MSO15244	15.3789	-92.9535	MANGO	M1W	33	crlm	65
MSO15245	15.3972	-92.9268	OTROS	M1W	33	crlm	85
MSO15246	15.3978	-92.9312	OTROS	M1W	33	crlm	71
MSO15247	15.3983	-92.9357	OTROS	M1W	33	crlm	252
MSO15248	15.4034	-92.9209	OTROS	M1W	33	crlm	298
MSO15249	15.3916	-92.9317	MANGO	M1W	33	crlm	26
MSO15250	15.3867	-92.9437	MANGO	M1W	33	crlm	93
MSO15251	15.3658	-92.9279	MANGO	M1W	33	crlm	99
MSO9944	15.4136	-92.8921	MANGO	M1W	34	crlm	30
MSO9943	15.4045	-92.8937	MANGO	M1W	34	crlm	29
MSO8312	15.4112	-92.8857	MANGO	M1W	34	crlm	25
MSO8329	15.3972	-92.8976	MANGO	M1W	34	crlm	19
MSO8330	15.3892	-92.9037	MANGO	M1W	34	crlm	0
MSO8340	15.4282	-92.9085	MANGO	M1W	34	crlm	0
MSO8344	15.3965	-92.9201	MANGO	M1W	34	crlm	14
MSO8341	15.4245	-92.9136	MANGO	M1W	34	crlm	0
MSO8342	15.3867	-92.9191	MANGO	M1W	34	crlm	62
MSO8343	15.4075	-92.9215	MANGO	M1W	34	crlm	0
MSO8346	15.3784	-92.9243	MANGO	M1W	34	crlm	9
MSO8345	15.3867	-92.9212	MANGO	M1W	34	crlm	0
MSO8347	15.3677	-92.9318	MANGO	M1W	34	crlm	70
MSO15230	15.4259	-92.905	OTROS	M1W	34	crlm	0
MSO15231	15.4216	-92.9081	MANGO	M1W	34	crlm	0
MSO15232	15.4137	-92.9077	MANGO	M1W	34	crlm	16
MSO15233	15.4098	-92.9058	CAIMITO	M1W	34	crlm	33
MSO15234	15.404	-92.9057	MANGO	M1W	34	crlm	24
MSO15235	15.3983	-92.909	MANGO	M1W	34	crlm	0
MSO15238	15.3774	-92.9146	MANGO	M1W	34	crlm	12
MSO15239	15.3719	-92.9289	NARANJA	M1W	34	crlm	32
MSO15240	15.3794	-92.9301	OTROS	M1W	34	crlm	75
MSO15241	15.3805	-92.9535	OTROS	M1W	34	crlm	72
MSO15242	15.381	-92.9424	OTROS	M1W	34	crlm	65
MSO15243	15.3816	-92.948	OTROS	M1W	34	crlm	83
MSO15244	15.3789	-92.9535	MANGO	M1W	34	crlm	74
MSO15245	15.3972	-92.9268	OTROS	M1W	34	crlm	0
MSO15246	15.3978	-92.9312	OTROS	M1W	34	crlm	45
MSO15247	15.3983	-92.9357	OTROS	M1W	34	crlm	27
MSO15248	15.4034	-92.9209	OTROS	M1W	34	crlm	19
MSO15249	15.3916	-92.9317	MANGO	M1W	34	crlm	41
MSO15250	15.3867	-92.9437	MANGO	M1W	34	crlm	19
MSO15251	15.3658	-92.9279	MANGO	M1W	34	crlm	26
MSO9944	15.4136	-92.8921	MANGO	M1W	35	crlm	115
MSO9943	15.4045	-92.8937	MANGO	M1W	35	crlm	167
MSO8312	15.4112	-92.8857	MANGO	M1W	35	crlm	118
MSO8329	15.3972	-92.8976	MANGO	M1W	35	crlm	167
MSO8330	15.3892	-92.9037	MANGO	M1W	35	crlm	119
MSO8340	15.4282	-92.9085	MANGO	M1W	35	crlm	154
MSO8344	15.3965	-92.9201	MANGO	M1W	35	crlm	145
MSO8341	15.4245	-92.9136	MANGO	M1W	35	crlm	187
MSO8342	15.3867	-92.9191	MANGO	M1W	35	crlm	127
MSO8343	15.4075	-92.9215	MANGO	M1W	35	crlm	144
MSO8346	15.3784	-92.9243	MANGO	M1W	35	crlm	104
MSO8345	15.3867	-92.9212	MANGO	M1W	35	crlm	125
MSO8347	15.3677	-92.9318	MANGO	M1W	35	crlm	125
MSO15230	15.4259	-92.905	OTROS	M1W	35	crlm	25
MSO15231	15.4216	-92.9081	MANGO	M1W	35	crlm	13
MSO15232	15.4137	-92.9077	MANGO	M1W	35	crlm	16
MSO15233	15.4098	-92.9058	CAIMITO	M1W	35	crlm	30
MSO15234	15.404	-92.9057	MANGO	M1W	35	crlm	15
MSO15235	15.3983	-92.909	MANGO	M1W	35	crlm	35
MSO15238	15.3774	-92.9146	MANGO	M1W	35	crlm	46
MSO15239	15.3719	-92.9289	NARANJA	M1W	35	crlm	115
MSO15240	15.3794	-92.9301	OTROS	M1W	35	crlm	24
MSO15241	15.3805	-92.9535	OTROS	M1W	35	crlm	12
MSO15242	15.381	-92.9424	OTROS	M1W	35	crlm	4
MSO15243	15.3816	-92.948	OTROS	M1W	35	crlm	0
MSO15244	15.3789	-92.9535	MANGO	M1W	35	crlm	0
MSO15245	15.3972	-92.9268	OTROS	M1W	35	crlm	45
MSO15246	15.3978	-92.9312	OTROS	M1W	35	crlm	18
MSO15247	15.3983	-92.9357	OTROS	M1W	35	crlm	0
MSO15248	15.4034	-92.9209	OTROS	M1W	35	crlm	55
MSO15249	15.3916	-92.9317	MANGO	M1W	35	crlm	44
MSO15250	15.3867	-92.9437	MANGO	M1W	35	crlm	0
MSO15251	15.3658	-92.9279	MANGO	M1W	35	crlm	116
MSO9944	15.4136	-92.8921	MANGO	M1W	36	crlm	13
MSO9943	15.4045	-92.8937	MANGO	M1W	36	crlm	0
MSO8312	15.4112	-92.8857	MANGO	M1W	36	crlm	0
MSO8329	15.3972	-92.8976	MANGO	M1W	36	crlm	0
MSO8330	15.3892	-92.9037	MANGO	M1W	36	crlm	0
MSO8340	15.4282	-92.9085	MANGO	M1W	36	crlm	12
MSO8344	15.3965	-92.9201	MANGO	M1W	36	crlm	9
MSO8341	15.4245	-92.9136	MANGO	M1W	36	crlm	7
MSO8342	15.3867	-92.9191	MANGO	M1W	36	crlm	238
MSO8343	15.4075	-92.9215	MANGO	M1W	36	crlm	174
MSO8346	15.3784	-92.9243	MANGO	M1W	36	crlm	12
MSO8345	15.3867	-92.9212	MANGO	M1W	36	crlm	16
MSO8347	15.3677	-92.9318	MANGO	M1W	36	crlm	0
MSO15230	15.4259	-92.905	OTROS	M1W	36	crlm	14
MSO15231	15.4216	-92.9081	MANGO	M1W	36	crlm	24
MSO15232	15.4137	-92.9077	MANGO	M1W	36	crlm	19
MSO15233	15.4098	-92.9058	CAIMITO	M1W	36	crlm	35
MSO15234	15.404	-92.9057	MANGO	M1W	36	crlm	22
MSO15235	15.3983	-92.909	MANGO	M1W	36	crlm	40
MSO15238	15.3774	-92.9146	MANGO	M1W	36	crlm	0
MSO15239	15.3719	-92.9289	NARANJA	M1W	36	crlm	0
MSO15240	15.3794	-92.9301	OTROS	M1W	36	crlm	12
MSO15241	15.3805	-92.9535	OTROS	M1W	36	crlm	19
MSO15242	15.381	-92.9424	OTROS	M1W	36	crlm	22
MSO15243	15.3816	-92.948	OTROS	M1W	36	crlm	42
MSO15244	15.3789	-92.9535	MANGO	M1W	36	crlm	74
MSO15245	15.3972	-92.9268	OTROS	M1W	36	crlm	167
MSO15246	15.3978	-92.9312	OTROS	M1W	36	crlm	148
MSO15247	15.3983	-92.9357	OTROS	M1W	36	crlm	201
MSO15248	15.4034	-92.9209	OTROS	M1W	36	crlm	44
MSO15249	15.3916	-92.9317	MANGO	M1W	36	crlm	174
MSO15250	15.3867	-92.9437	MANGO	M1W	36	crlm	12
MSO15251	15.3658	-92.9279	MANGO	M1W	36	crlm	1
MSO9944	15.4136	-92.8921	MANGO	M1W	37	crlm	0
MSO9943	15.4045	-92.8937	MANGO	M1W	37	crlm	0
MSO8312	15.4112	-92.8857	MANGO	M1W	37	crlm	0
MSO8329	15.3972	-92.8976	MANGO	M1W	37	crlm	0
MSO8330	15.3892	-92.9037	MANGO	M1W	37	crlm	15
MSO8340	15.4282	-92.9085	MANGO	M1W	37	crlm	0
MSO8344	15.3965	-92.9201	MANGO	M1W	37	crlm	95
MSO8341	15.4245	-92.9136	MANGO	M1W	37	crlm	0
MSO8342	15.3867	-92.9191	MANGO	M1W	37	crlm	261
MSO8343	15.4075	-92.9215	MANGO	M1W	37	crlm	306
MSO8346	15.3784	-92.9243	MANGO	M1W	37	crlm	244
MSO8345	15.3867	-92.9212	MANGO	M1W	37	crlm	188
MSO8347	15.3677	-92.9318	MANGO	M1W	37	crlm	0
MSO15230	15.4259	-92.905	OTROS	M1W	37	crlm	0
MSO15231	15.4216	-92.9081	MANGO	M1W	37	crlm	12
MSO15232	15.4137	-92.9077	MANGO	M1W	37	crlm	18
MSO15233	15.4098	-92.9058	CAIMITO	M1W	37	crlm	35
MSO15234	15.404	-92.9057	MANGO	M1W	37	crlm	75
MSO15235	15.3983	-92.909	MANGO	M1W	37	crlm	44
MSO15238	15.3774	-92.9146	MANGO	M1W	37	crlm	0
MSO15239	15.3719	-92.9289	NARANJA	M1W	37	crlm	0
MSO15240	15.3794	-92.9301	OTROS	M1W	37	crlm	42
MSO15241	15.3805	-92.9535	OTROS	M1W	37	crlm	56
MSO15242	15.381	-92.9424	OTROS	M1W	37	crlm	75
MSO15243	15.3816	-92.948	OTROS	M1W	37	crlm	55
MSO15244	15.3789	-92.9535	MANGO	M1W	37	crlm	0
MSO15245	15.3972	-92.9268	OTROS	M1W	37	crlm	42
MSO15246	15.3978	-92.9312	OTROS	M1W	37	crlm	17
MSO15247	15.3983	-92.9357	OTROS	M1W	37	crlm	6
MSO15248	15.4034	-92.9209	OTROS	M1W	37	crlm	202
MSO15249	15.3916	-92.9317	MANGO	M1W	37	crlm	11
MSO15250	15.3867	-92.9437	MANGO	M1W	37	crlm	21
MSO15251	15.3658	-92.9279	MANGO	M1W	37	crlm	0
MSO9944	15.4136	-92.8921	MANGO	M1W	38	crlm	61
MSO9943	15.4045	-92.8937	MANGO	M1W	38	crlm	112
MSO8312	15.4112	-92.8857	MANGO	M1W	38	crlm	14
MSO8329	15.3972	-92.8976	MANGO	M1W	38	crlm	44
MSO8330	15.3892	-92.9037	MANGO	M1W	38	crlm	99
MSO8340	15.4282	-92.9085	MANGO	M1W	38	crlm	0
MSO8344	15.3965	-92.9201	MANGO	M1W	38	crlm	125
MSO8341	15.4245	-92.9136	MANGO	M1W	38	crlm	0
MSO8342	15.3867	-92.9191	MANGO	M1W	38	crlm	0
MSO8343	15.4075	-92.9215	MANGO	M1W	38	crlm	0
MSO8346	15.3784	-92.9243	MANGO	M1W	38	crlm	12
MSO8345	15.3867	-92.9212	MANGO	M1W	38	crlm	24
MSO8347	15.3677	-92.9318	MANGO	M1W	38	crlm	30
MSO15230	15.4259	-92.905	OTROS	M1W	38	crlm	0
MSO15231	15.4216	-92.9081	MANGO	M1W	38	crlm	0
MSO15232	15.4137	-92.9077	MANGO	M1W	38	crlm	182
MSO15233	15.4098	-92.9058	CAIMITO	M1W	38	crlm	101
MSO15234	15.404	-92.9057	MANGO	M1W	38	crlm	115
MSO15235	15.3983	-92.909	MANGO	M1W	38	crlm	124
MSO15238	15.3774	-92.9146	MANGO	M1W	38	crlm	17
MSO15239	15.3719	-92.9289	NARANJA	M1W	38	crlm	24
MSO15240	15.3794	-92.9301	OTROS	M1W	38	crlm	21
MSO15241	15.3805	-92.9535	OTROS	M1W	38	crlm	9
MSO15242	15.381	-92.9424	OTROS	M1W	38	crlm	12
MSO15243	15.3816	-92.948	OTROS	M1W	38	crlm	0
MSO15244	15.3789	-92.9535	MANGO	M1W	38	crlm	0
MSO15245	15.3972	-92.9268	OTROS	M1W	38	crlm	18
MSO15246	15.3978	-92.9312	OTROS	M1W	38	crlm	0
MSO15247	15.3983	-92.9357	OTROS	M1W	38	crlm	0
MSO15248	15.4034	-92.9209	OTROS	M1W	38	crlm	25
MSO15249	15.3916	-92.9317	MANGO	M1W	38	crlm	44
MSO15250	15.3867	-92.9437	MANGO	M1W	38	crlm	0
MSO15251	15.3658	-92.9279	MANGO	M1W	38	crlm	32
MSO9944	15.4136	-92.8921	MANGO	M1W	39	crlm	99
MSO9943	15.4045	-92.8937	MANGO	M1W	39	crlm	188
MSO8312	15.4112	-92.8857	MANGO	M1W	39	crlm	171
MSO8329	15.3972	-92.8976	MANGO	M1W	39	crlm	187
MSO8330	15.3892	-92.9037	MANGO	M1W	39	crlm	142
MSO8340	15.4282	-92.9085	MANGO	M1W	39	crlm	0
MSO8344	15.3965	-92.9201	MANGO	M1W	39	crlm	231
MSO8341	15.4245	-92.9136	MANGO	M1W	39	crlm	199
MSO8342	15.3867	-92.9191	MANGO	M1W	39	crlm	185
MSO8343	15.4075	-92.9215	MANGO	M1W	39	crlm	34
MSO8346	15.3784	-92.9243	MANGO	M1W	39	crlm	0
MSO8345	15.3867	-92.9212	MANGO	M1W	39	crlm	34
MSO8347	15.3677	-92.9318	MANGO	M1W	39	crlm	0
MSO15230	15.4259	-92.905	OTROS	M1W	39	crlm	0
MSO15231	15.4216	-92.9081	MANGO	M1W	39	crlm	0
MSO15232	15.4137	-92.9077	MANGO	M1W	39	crlm	16
MSO15233	15.4098	-92.9058	CAIMITO	M1W	39	crlm	18
MSO15234	15.404	-92.9057	MANGO	M1W	39	crlm	0
MSO15235	15.3983	-92.909	MANGO	M1W	39	crlm	0
MSO15238	15.3774	-92.9146	MANGO	M1W	39	crlm	24
MSO15239	15.3719	-92.9289	NARANJA	M1W	39	crlm	0
MSO15240	15.3794	-92.9301	OTROS	M1W	39	crlm	151
MSO15241	15.3805	-92.9535	OTROS	M1W	39	crlm	149
MSO15242	15.381	-92.9424	OTROS	M1W	39	crlm	131
MSO15243	15.3816	-92.948	OTROS	M1W	39	crlm	22
MSO15244	15.3789	-92.9535	MANGO	M1W	39	crlm	11
MSO15245	15.3972	-92.9268	OTROS	M1W	39	crlm	32
MSO15246	15.3978	-92.9312	OTROS	M1W	39	crlm	0
MSO15247	15.3983	-92.9357	OTROS	M1W	39	crlm	0
MSO15248	15.4034	-92.9209	OTROS	M1W	39	crlm	33
MSO15249	15.3916	-92.9317	MANGO	M1W	39	crlm	24
MSO15250	15.3867	-92.9437	MANGO	M1W	39	crlm	44
MSO15251	15.3658	-92.9279	MANGO	M1W	39	crlm	0
MSO9944	15.4136	-92.8921	MANGO	M1W	40	crlm	2
MSO9943	15.4045	-92.8937	MANGO	M1W	40	crlm	16
MSO8312	15.4112	-92.8857	MANGO	M1W	40	crlm	22
MSO8329	15.3972	-92.8976	MANGO	M1W	40	crlm	113
MSO8330	15.3892	-92.9037	MANGO	M1W	40	crlm	12
MSO8340	15.4282	-92.9085	MANGO	M1W	40	crlm	0
MSO8344	15.3965	-92.9201	MANGO	M1W	40	crlm	18
MSO8341	15.4245	-92.9136	MANGO	M1W	40	crlm	0
MSO8342	15.3867	-92.9191	MANGO	M1W	40	crlm	0
MSO8343	15.4075	-92.9215	MANGO	M1W	40	crlm	0
MSO8346	15.3784	-92.9243	MANGO	M1W	40	crlm	97
MSO8345	15.3867	-92.9212	MANGO	M1W	40	crlm	112
MSO8347	15.3677	-92.9318	MANGO	M1W	40	crlm	154
MSO15230	15.4259	-92.905	OTROS	M1W	40	crlm	0
MSO15231	15.4216	-92.9081	MANGO	M1W	40	crlm	0
MSO15232	15.4137	-92.9077	MANGO	M1W	40	crlm	21
MSO15233	15.4098	-92.9058	CAIMITO	M1W	40	crlm	32
MSO15234	15.404	-92.9057	MANGO	M1W	40	crlm	4
MSO15235	15.3983	-92.909	MANGO	M1W	40	crlm	85
MSO15238	15.3774	-92.9146	MANGO	M1W	40	crlm	66
MSO15239	15.3719	-92.9289	NARANJA	M1W	40	crlm	17
MSO15240	15.3794	-92.9301	OTROS	M1W	40	crlm	23
MSO15241	15.3805	-92.9535	OTROS	M1W	40	crlm	2
MSO15242	15.381	-92.9424	OTROS	M1W	40	crlm	58
MSO15243	15.3816	-92.948	OTROS	M1W	40	crlm	0
MSO15244	15.3789	-92.9535	MANGO	M1W	40	crlm	24
MSO15245	15.3972	-92.9268	OTROS	M1W	40	crlm	121
MSO15246	15.3978	-92.9312	OTROS	M1W	40	crlm	0
MSO15247	15.3983	-92.9357	OTROS	M1W	40	crlm	26
MSO15248	15.4034	-92.9209	OTROS	M1W	40	crlm	9
MSO15249	15.3916	-92.9317	MANGO	M1W	40	crlm	84
MSO15250	15.3867	-92.9437	MANGO	M1W	40	crlm	82
MSO15251	15.3658	-92.9279	MANGO	M1W	40	crlm	41

## Sheet: C.capitata_per_polygon
WEEK	Polygon	Rel_machine	Area	Long	Wide	Density	Req_material	pcent_distrib	FTD	capture	installed_traps	positive_traps	Nb_released	pcent_positive_traps	pcent_recapt
21	M1X	smart	3000	7500	4000	2000	6000000	1	5.04	1235	35	35	6000000	1	0.0205833
22	M1X	smart	3000	7500	4000	2000	6000000	0.97	1.24	305	35	34	5820000	0.971429	0.00524055
23	M1X	smart	3000	7500	4000	2000	6000000	1	1.84	450	35	35	6000000	1	0.0075
24	M1X	smart	3000	7500	4000	2000	6000000	1	1.36	332	35	35	6000000	1	0.00553333
25	M1X	smart	3000	7500	4000	2000	6000000	1	0.34	84	35	35	6000000	1	0.0014
26	M1X	smart	3000	7500	4000	1500	4500000	0.97	2.52	617	35	34	4365000	0.971429	0.0141352
27	M1X	smart	3000	7500	4000	1500	4500000	0.97	3.69	904	35	34	4365000	0.971429	0.0207102
28	M1X	smart	3000	7500	4000	1500	4500000	1	8.79	2154	35	35	4500000	1	0.0478667
29	M1X	smart	3000	7500	4000	1500	4500000	0.91	14.9	3651	35	32	4095000	0.914286	0.0891575
30	M1X	smart	3000	7500	4000	1500	4500000	0.94	7.44	1823	35	33	4230000	0.942857	0.0430969
31	M1X	smart	3000	7500	4000	1000	3000000	1	14.91	3654	35	35	3000000	1	0.1218
32	M1X	smart	3000	7500	4000	1000	3000000	0.94	7.18	1760	35	33	2820000	0.942857	0.0624113
33	M1X	smart	3000	7500	4000	1000	3000000	0.91	11.02	2701	35	32	2730000	0.914286	0.0989377
34	M1X	smart	3000	7500	4000	1000	3000000	0.94	10.08	2470	35	33	2820000	0.942857	0.0875887
35	M1X	smart	3000	7500	4000	1000	3000000	0.91	8.58	2103	35	32	2730000	0.914286	0.077033
36	M1X	smart	3000	7500	4000	500	1500000	1	6.75	1654	35	35	1500000	1	0.110267
37	M1X	smart	3000	7500	4000	500	1500000	0.97	5.6	1372	35	34	1455000	0.971429	0.0942955
38	M1X	smart	3000	7500	4000	500	1500000	0.94	4.07	998	35	33	1410000	0.942857	0.0707801
39	M1X	smart	3000	7500	4000	500	1500000	0.91	7.61	1865	35	32	1365000	0.914286	0.13663
40	M1X	smart	3000	7500	4000	500	1500000	0.91	2.02	1054	35	32	1365000	0.914286	0.0772161
21	M1W	conveyor	3000	7500	4000	2000	6000000	0.85	6.58	1520	33	28	5100000	0.848485	0.0298039
22	M1W	conveyor	3000	7500	4000	2000	6000000	0.97	2.6	601	33	32	5820000	0.969697	0.0103265
23	M1W	conveyor	3000	7500	4000	2000	6000000	1	8.96	2070	33	33	6000000	1	0.0345
24	M1W	conveyor	3000	7500	4000	2000	6000000	0.97	1.63	377	33	32	5820000	0.969697	0.00647766
25	M1W	conveyor	3000	7500	4000	2000	6000000	1	1.49	345	33	33	6000000	1	0.00575
26	M1W	conveyor	3000	7500	4000	1500	4500000	0.97	4.03	930	33	32	4365000	0.969697	0.0213058
27	M1W	conveyor	3000	7500	4000	1500	4500000	0.97	5.86	1354	33	32	4365000	0.969697	0.0310195
28	M1W	conveyor	3000	7500	4000	1500	4500000	0.91	10.39	2401	33	30	4095000	0.909091	0.0586325
29	M1W	conveyor	3000	7500	4000	1500	4500000	0.94	11.87	2741	33	31	4230000	0.939394	0.0647991
30	M1W	conveyor	3000	7500	4000	1500	4500000	0.94	13.65	3154	33	31	4230000	0.939394	0.0745626
31	M1W	conveyor	3000	7500	4000	1000	3000000	0.91	14.94	3450	33	30	2730000	0.909091	0.126374
32	M1W	conveyor	3000	7500	4000	1000	3000000	0.85	5.45	1259	33	28	2550000	0.848485	0.0493725
33	M1W	conveyor	3000	7500	4000	1000	3000000	0.82	12.94	2988	33	27	2460000	0.818182	0.121463
34	M1W	conveyor	3000	7500	4000	1000	3000000	0.73	3.99	921	33	24	2190000	0.727273	0.0420548
35	M1W	conveyor	3000	7500	4000	1000	3000000	0.88	10.43	2410	33	29	2640000	0.878788	0.0912879
36	M1W	conveyor	3000	7500	4000	500	1500000	0.79	6.71	1551	33	26	1185000	0.787879	0.130886
37	M1W	conveyor	3000	7500	4000	500	1500000	0.64	7.88	1820	33	21	960000	0.636364	0.189583
38	M1W	conveyor	3000	7500	4000	500	1500000	0.64	5.39	1245	33	21	960000	0.636364	0.129688
39	M1W	conveyor	3000	7500	4000	500	1500000	0.67	9.2	2125	33	22	1005000	0.666667	0.211443
40	M1W	conveyor	3000	7500	4000	500	1500000	0.76	5.37	1241	33	25	1140000	0.757576	0.10886

## Sheet: G.p.gambiensis_per_polygon
Date	capture	Nb_released	positive_traps	installed_traps	type	temp
2013-11-14	3	4582	3	19	paper_box	ambient
2013-11-21	0	3732	0	19	paper_box	ambiant
2013-11-28	0	1971	0	19	paper_box	ambiant
2013-12-05	1	2107	1	19	paper_box	ambiant
2013-12-12	1	3974	1	19	paper_box	ambiant
2013-12-19	2	3207	2	19	paper_box	ambiant
2013-12-26	2	6233	1	19	paper_box	ambiant
2014-01-02	7	9851	4	19	paper_box	controlled
2014-01-09	5	9851	4	19	paper_box	controlled
2014-01-16	6	7749	4	19	paper_box	controlled
2014-01-23	4	7560	3	19	paper_box	controlled
2014-01-29	6	8752	6	19	paper_box	controlled
2014-02-05	7	9895	4	19	paper_box	controlled
2014-02-12	8	6147	2	19	paper_box	controlled
2014-02-26	11	8805	6	19	paper_box	controlled
2014-03-05	0	7295	0	19	msrm	06to10
2014-03-12	1	8401	1	19	msrm	06to10
2014-03-19	1	10069	1	19	msrm	06to10
2014-03-26	0	2377	0	19	msrm	06to10
2014-04-02	2	7872	2	19	msrm	06to10
2014-04-10	1	5097	1	19	msrm	06to10
2014-04-16	3	6485	3	19	msrm	09to12
2014-04-23	2	4911	1	19	msrm	09to12
2014-05-01	6	5000	2	19	msrm	09to12
2014-05-07	5	5573	2	19	msrm	09to12
2014-05-14	2	10273	2	19	msrm	09to12
